# Supplementary material
Source: publisher site journal article supplement (https://www.spandidos-publications.com/4849/downloadSupplementary)
Supplement: Supplementary file 1 [file downloadSupplementary]

## Sheet: DPSCEXOvsDPSC
Table SIII. Statistics of differentially expressed proteins in DPSC-Exos.
Protein accession	Protein description	DPSCEXO/DPSC Ratio	Regulated Type	DPSCEXO/DPSC P value	Gene name	MW [kDa]	Coverage [%]	Subcellular localization	Biological Process	Cellular Component	Molecular Function	KEGG KO No.	KEGG Gene	KEGG pathway	IPR ID	Domain description
P02656	Apolipoprotein C-III OS=Homo sapiens OX=9606 GN=APOC3 PE=1 SV=1	17.818	Up	9.3631e-07	APOC3	10.852	16.2	extracellular	GO:0060627 regulation of vesicle-mediated transport; GO:0044700 single organism signaling; GO:0044085 cellular component biogenesis; GO:0065008 regulation of biological quality; GO:0032371 regulation of sterol transport; GO:0034379 very-low-density lipoprotein particle assembly; GO:0044255 cellular lipid metabolic process; GO:0070328 triglyceride homeostasis; GO:0019216 regulation of lipid metabo…	GO:0005615 extracellular space; GO:0044421 extracellular region part; GO:0031410 cytoplasmic vesicle; GO:0005737 cytoplasm; GO:0031982 vesicle; GO:0034358 plasma lipoprotein particle; GO:0034385 triglyceride-rich plasma lipoprotein particle; GO:0032991 macromolecular complex; GO:0044424 intracellular part; GO:0005623 cell; GO:0034361 very-low-density lipoprotein particle; GO:0005769 early endosom…	GO:0015485 cholesterol binding; GO:0032934 sterol binding; GO:0055102 lipase inhibitor activity; GO:0070653 high-density lipoprotein particle receptor binding; GO:0005102 receptor binding; GO:0043167 ion binding; GO:0005515 protein binding; GO:0098772 molecular function regulator; GO:0004857 enzyme inhibitor activity; GO:0005496 steroid binding; GO:0097159 organic cyclic compound binding; GO:0070…	K08759	APOC3; apolipoprotein C-III	hsa03320 PPAR signaling pathway - Homo sapiens (human); hsa04979 Cholesterol metabolism - Homo sapiens (human);
Q96EY1	DnaJ homolog subfamily A member 3, mitochondrial OS=Homo sapiens OX=9606 GN=DNAJA3 PE=1 SV=2	1.507	Up	0.00090327	DNAJA3	52.488	4	mitochondria	GO:0044700 single organism signaling; GO:0002694 regulation of leukocyte activation; GO:0010941 regulation of cell death; GO:0031347 regulation of defense response; GO:0044237 cellular metabolic process; GO:0032088 negative regulation of NF-kappaB transcription factor activity; GO:0042110 T cell activation; GO:0010466 negative regulation of peptidase activity; GO:0008152 metabolic process; GO:003…	GO:0016020 membrane; GO:0019898 extrinsic component of membrane; GO:0071944 cell periphery; GO:0030054 cell junction; GO:0005737 cytoplasm; GO:0044424 intracellular part; GO:0005623 cell; GO:0044422 organelle part; GO:0043228 non-membrane-bounded organelle; GO:0031974 membrane-enclosed lumen; GO:0098590 plasma membrane region; GO:0070013 intracellular organelle lumen; GO:0044425 membrane part; GO…	GO:1901265 nucleoside phosphate binding; GO:0005102 receptor binding; GO:0060589 nucleoside-triphosphatase regulator activity; GO:0019901 protein kinase binding; GO:0030695 GTPase regulator activity; GO:0005515 protein binding; GO:0098772 molecular function regulator; GO:0030544 Hsp70 protein binding; GO:1901363 heterocyclic compound binding; GO:0097159 organic cyclic compound binding; GO:0032553…	K09504	DNAJA3; DnaJ homolog subfamily A member 3	hsa05203 Viral carcinogenesis - Homo sapiens (human);	IPR008971; IPR002939; IPR001623; IPR001305;	HSP40/DnaJ peptide-binding; Chaperone DnaJ, C-terminal; DnaJ domain; Heat shock protein DnaJ, cysteine-rich domain;
P05388	60S acidic ribosomal protein P0 OS=Homo sapiens OX=9606 GN=RPLP0 PE=1 SV=1	0.563	Down	0.00128201	RPLP0	34.273	32.8	cytoplasm,nucleus	GO:0044085 cellular component biogenesis; GO:0022613 ribonucleoprotein complex biogenesis; GO:0072594 establishment of protein localization to organelle; GO:0006518 peptide metabolic process; GO:0009058 biosynthetic process; GO:0044764 multi-organism cellular process; GO:0044237 cellular metabolic process; GO:0071345 cellular response to cytokine stimulus; GO:0015031 protein transport; GO:0051234…	GO:0016020 membrane; GO:0030425 dendrite; GO:0044421 extracellular region part; GO:0005783 endoplasmic reticulum; GO:0030054 cell junction; GO:0031982 vesicle; GO:0005737 cytoplasm; GO:0032991 macromolecular complex; GO:0044424 intracellular part; GO:0005623 cell; GO:0036464 cytoplasmic ribonucleoprotein granule; GO:0044422 organelle part; GO:0043228 non-membrane-bounded organelle; GO:0070062 ext…	GO:0097159 organic cyclic compound binding; GO:1901363 heterocyclic compound binding; GO:0003723 RNA binding; GO:0005488 binding; GO:0003676 nucleic acid binding; GO:0005515 protein binding; GO:0005198 structural molecule activity; GO:0003735 structural constituent of ribosome;	K02941	RP-LP0, RPLP0; large subunit ribosomal protein LP0	hsa03010 Ribosome - Homo sapiens (human);
Q9QC07	Endogenous retrovirus group K member 18 Pol protein OS=Homo sapiens OX=9606 GN=ERVK-18 PE=3 SV=2	4.237	Up	0.000160583	ERVK-18	91.946	2.6	mitochondria	GO:0006725 cellular aromatic compound metabolic process; GO:0006259 DNA metabolic process; GO:0009058 biosynthetic process; GO:0044237 cellular metabolic process; GO:0071704 organic substance metabolic process; GO:0008152 metabolic process; GO:0046483 heterocycle metabolic process; GO:0019438 aromatic compound biosynthetic process; GO:0006139 nucleobase-containing compound metabolic process; GO:0…		GO:0003677 DNA binding; GO:0004523 RNA-DNA hybrid ribonuclease activity; GO:0043167 ion binding; GO:0003964 RNA-directed DNA polymerase activity; GO:0004521 endoribonuclease activity; GO:0016787 hydrolase activity; GO:0016891 endoribonuclease activity, producing 5'-phosphomonoesters; GO:0008270 zinc ion binding; GO:1901363 heterocyclic compound binding; GO:0097159 organic cyclic compound binding;…				IPR001584; IPR000477; IPR012337; IPR002156; IPR017856; IPR003308; IPR010661;	Integrase, catalytic core; Reverse transcriptase domain; Ribonuclease H-like domain; Ribonuclease H domain; Integrase, N-terminal zinc-binding domain-like; Integrase, N-terminal zinc-binding domain; Reverse transcriptase thumb;
Q9H3S7	Tyrosine-protein phosphatase non-receptor type 23 OS=Homo sapiens OX=9606 GN=PTPN23 PE=1 SV=1	1.918	Up	0.00117877	PTPN23	178.97	10.9	nucleus	GO:0044085 cellular component biogenesis; GO:0060627 regulation of vesicle-mediated transport; GO:1903391 regulation of adherens junction organization; GO:0010633 negative regulation of epithelial cell migration; GO:0060271 cilium assembly; GO:0044699 single-organism process; GO:0051241 negative regulation of multicellular organismal process; GO:0044237 cellular metabolic process; GO:0015031 prot…	GO:0044421 extracellular region part; GO:0031410 cytoplasmic vesicle; GO:0005737 cytoplasm; GO:0031982 vesicle; GO:0044424 intracellular part; GO:0016604 nuclear body; GO:0005623 cell; GO:0044422 organelle part; GO:0005769 early endosome; GO:0043228 non-membrane-bounded organelle; GO:0070062 extracellular exosome; GO:0031974 membrane-enclosed lumen; GO:0005856 cytoskeleton; GO:0005654 nucleoplasm…	GO:0004725 protein tyrosine phosphatase activity; GO:0003824 catalytic activity; GO:0042578 phosphoric ester hydrolase activity; GO:0005488 binding; GO:0016791 phosphatase activity; GO:0019901 protein kinase binding; GO:0016788 hydrolase activity, acting on ester bonds; GO:0016787 hydrolase activity; GO:0005515 protein binding; GO:0004721 phosphoprotein phosphatase activity; GO:0019900 kinase bin…	K18040	PTPN23; tyrosine-protein phosphatase non-receptor type 23 [EC:3.1.3.48]		IPR029021; IPR000387; IPR003595; IPR000242; IPR025304; IPR004328;	Protein-tyrosine phosphatase-like; Tyrosine specific protein phosphatases domain; Protein-tyrosine phosphatase, catalytic; PTP type protein phosphatase; ALIX V-shaped domain; BRO1 domain;
Q9H1X3	DnaJ homolog subfamily C member 25 OS=Homo sapiens OX=9606 GN=DNAJC25 PE=1 SV=1	5.51	Up	2.2311e-05	DNAJC25	42.403	3.3	plasma membrane		GO:0031224 intrinsic component of membrane; GO:0016020 membrane; GO:0016021 integral component of membrane; GO:0044425 membrane part;		K19371	DNAJC25; DnaJ homolog subfamily C member 25		IPR001623;	DnaJ domain;
O75342	Arachidonate 12-lipoxygenase, 12R-type OS=Homo sapiens OX=9606 GN=ALOX12B PE=1 SV=1	0.315	Down	0.00029976	ALOX12B	80.355	1	cytoplasm	GO:0065008 regulation of biological quality; GO:0032270 positive regulation of cellular protein metabolic process; GO:0006672 ceramide metabolic process; GO:0044255 cellular lipid metabolic process; GO:0044237 cellular metabolic process; GO:0042157 lipoprotein metabolic process; GO:0008610 lipid biosynthetic process; GO:0008152 metabolic process; GO:0030148 sphingolipid biosynthetic process; GO:0…	GO:0044464 cell part; GO:0005622 intracellular; GO:0005737 cytoplasm; GO:0044424 intracellular part; GO:0005623 cell; GO:0005829 cytosol; GO:0044444 cytoplasmic part;	GO:0004052 arachidonate 12-lipoxygenase activity; GO:0016702 oxidoreductase activity, acting on single donors with incorporation of molecular oxygen, incorporation of two atoms of oxygen; GO:1990136 linoleate 9S-lipoxygenase activity; GO:0005506 iron ion binding; GO:0016701 oxidoreductase activity, acting on single donors with incorporation of molecular oxygen; GO:0046914 transition metal ion bin…	K08021	ALOX12B; arachidonate 12-lipoxygenase (R-type) [EC:1.13.11.-]	hsa00590 Arachidonic acid metabolism - Homo sapiens (human); hsa01100 Metabolic pathways - Homo sapiens (human); hsa04726 Serotonergic synapse - Homo sapiens (human);	IPR001024; IPR013819;	PLAT/LH2 domain; Lipoxygenase, C-terminal;
Q13438	Protein OS-9 OS=Homo sapiens OX=9606 GN=OS9 PE=1 SV=1	2.544	Up	0.00046042	OS9	75.561	6.7	endoplasmic reticulum	GO:0036508 protein alpha-1,2-demannosylation; GO:0065008 regulation of biological quality; GO:1904380 endoplasmic reticulum mannose trimming; GO:0006517 protein deglycosylation; GO:0090317 negative regulation of intracellular protein transport; GO:0044699 single-organism process; GO:0036503 ERAD pathway; GO:1905897 regulation of response to endoplasmic reticulum stress; GO:0044237 cellular metabo…	GO:0000153 cytoplasmic ubiquitin ligase complex; GO:0016020 membrane; GO:0005788 endoplasmic reticulum lumen; GO:0043229 intracellular organelle; GO:0042175 nuclear outer membrane-endoplasmic reticulum membrane network; GO:0005783 endoplasmic reticulum; GO:0005737 cytoplasm; GO:0044446 intracellular organelle part; GO:0032991 macromolecular complex; GO:0012505 endomembrane system; GO:0044424 intr…	GO:0002020 protease binding; GO:0030246 carbohydrate binding; GO:0097367 carbohydrate derivative binding; GO:0005515 protein binding; GO:0001948 glycoprotein binding; GO:0019899 enzyme binding; GO:0005488 binding;	K10088	OS9; protein OS-9	hsa04141 Protein processing in endoplasmic reticulum - Homo sapiens (human);	IPR009011; IPR012913;	Mannose-6-phosphate receptor binding domain; Glucosidase II beta subunit-like;
Q9H974	Queuine tRNA-ribosyltransferase accessory subunit 2 OS=Homo sapiens OX=9606 GN=QTRT2 PE=1 SV=1	2.916	Up	7.9312e-07	QTRT2	46.712	3.6	cytoplasm	GO:0009116 nucleoside metabolic process; GO:0006725 cellular aromatic compound metabolic process; GO:0044699 single-organism process; GO:0009163 nucleoside biosynthetic process; GO:0009058 biosynthetic process; GO:1901566 organonitrogen compound biosynthetic process; GO:0009451 RNA modification; GO:0044237 cellular metabolic process; GO:0071704 organic substance metabolic process; GO:0008152 meta…	GO:0043229 intracellular organelle; GO:0016020 membrane; GO:0019867 outer membrane; GO:0044429 mitochondrial part; GO:0098588 bounding membrane of organelle; GO:0031090 organelle membrane; GO:0005741 mitochondrial outer membrane; GO:0005737 cytoplasm; GO:0044446 intracellular organelle part; GO:0031967 organelle envelope; GO:0044424 intracellular part; GO:0005623 cell; GO:0044422 organelle part; …	GO:0016763 transferase activity, transferring pentosyl groups; GO:0042802 identical protein binding; GO:0046982 protein heterodimerization activity; GO:0003824 catalytic activity; GO:0008479 queuine tRNA-ribosyltransferase activity; GO:0042803 protein homodimerization activity; GO:0005488 binding; GO:0043167 ion binding; GO:0046983 protein dimerization activity; GO:0046872 metal ion binding; GO:0…	K15407	QTRTD1; queuine tRNA-ribosyltransferase subunit QTRTD1 [EC:2.4.2.29]
Q8NCL4	Polypeptide N-acetylgalactosaminyltransferase 6 OS=Homo sapiens OX=9606 GN=GALNT6 PE=2 SV=2	1.933	Up	0.022645	GALNT6	71.158	8.2	extracellular	GO:0006486 protein glycosylation; GO:0043413 macromolecule glycosylation; GO:0009101 glycoprotein biosynthetic process; GO:0044763 single-organism cellular process; GO:0044267 cellular protein metabolic process; GO:0009100 glycoprotein metabolic process; GO:0044699 single-organism process; GO:0009058 biosynthetic process; GO:0044238 primary metabolic process; GO:0044237 cellular metabolic process…	GO:0043229 intracellular organelle; GO:0016020 membrane; GO:0098588 bounding membrane of organelle; GO:0031090 organelle membrane; GO:0044446 intracellular organelle part; GO:0005737 cytoplasm; GO:0000139 Golgi membrane; GO:0031224 intrinsic component of membrane; GO:0012505 endomembrane system; GO:0044424 intracellular part; GO:0005623 cell; GO:0016021 integral component of membrane; GO:0044422 …	GO:0004653 polypeptide N-acetylgalactosaminyltransferase activity; GO:0016758 transferase activity, transferring hexosyl groups; GO:0003824 catalytic activity; GO:0005488 binding; GO:0043167 ion binding; GO:0030246 carbohydrate binding; GO:0046872 metal ion binding; GO:0043169 cation binding; GO:0008194 UDP-glycosyltransferase activity; GO:0016757 transferase activity, transferring glycosyl group…	K00710	GALNT; polypeptide N-acetylgalactosaminyltransferase [EC:2.4.1.41]	hsa00512 Mucin type O-glycan biosynthesis - Homo sapiens (human); hsa01100 Metabolic pathways - Homo sapiens (human);	IPR029044; IPR000772; IPR001173;	Nucleotide-diphospho-sugar transferases; Ricin B, lectin domain; Glycosyltransferase 2-like;
Q9UPN4	Centrosomal protein of 131 kDa OS=Homo sapiens OX=9606 GN=CEP131 PE=1 SV=3	3.367	Up	2.3034e-05	CEP131	122.15	2.5	cytoplasm,nucleus	GO:0098840 protein transport along microtubule; GO:0044085 cellular component biogenesis; GO:0022414 reproductive process; GO:0048869 cellular developmental process; GO:1905508 protein localization to microtubule organizing center; GO:0060271 cilium assembly; GO:0044699 single-organism process; GO:0010564 regulation of cell cycle process; GO:0015031 protein transport; GO:0044782 cilium organizati…	GO:0044421 extracellular region part; GO:0044450 microtubule organizing center part; GO:0031410 cytoplasmic vesicle; GO:0035869 ciliary transition zone; GO:0005737 cytoplasm; GO:0031982 vesicle; GO:0044424 intracellular part; GO:0005623 cell; GO:0044422 organelle part; GO:0043228 non-membrane-bounded organelle; GO:0005856 cytoskeleton; GO:0005815 microtubule organizing center; GO:0015630 microtub…	GO:0042802 identical protein binding; GO:0042803 protein homodimerization activity; GO:0005488 binding; GO:0044877 macromolecular complex binding; GO:0046983 protein dimerization activity; GO:0005515 protein binding; GO:0032403 protein complex binding;	K16540	AZI1, CEP131; 5-azacytidine-induced protein 1
P08123	Collagen alpha-2(I) chain OS=Homo sapiens OX=9606 GN=COL1A2 PE=1 SV=7	9.04	Up	1.1993e-07	COL1A2	129.31	64.8	extracellular	GO:0044085 cellular component biogenesis; GO:0044700 single organism signaling; GO:0001101 response to acid chemical; GO:0007596 blood coagulation; GO:0065008 regulation of biological quality; GO:0051674 localization of cell; GO:0030199 collagen fibril organization; GO:0007166 cell surface receptor signaling pathway; GO:0001568 blood vessel development; GO:0071560 cellular response to transformin…	GO:0005584 collagen type I trimer; GO:0005615 extracellular space; GO:0005783 endoplasmic reticulum; GO:0044421 extracellular region part; GO:0098643 banded collagen fibril; GO:0031982 vesicle; GO:0005737 cytoplasm; GO:0005583 fibrillar collagen trimer; GO:0032991 macromolecular complex; GO:0044424 intracellular part; GO:0099512 supramolecular fiber; GO:0005623 cell; GO:0099080 supramolecular com…	GO:0005201 extracellular matrix structural constituent; GO:0030674 protein binding, bridging; GO:0042802 identical protein binding; GO:0019838 growth factor binding; GO:0005488 binding; GO:0043167 ion binding; GO:0048407 platelet-derived growth factor binding; GO:0046872 metal ion binding; GO:0043169 cation binding; GO:0005515 protein binding; GO:0060090 binding, bridging; GO:0046332 SMAD binding…	K06236	COL1A; collagen, type I, alpha	hsa04151 PI3K-Akt signaling pathway - Homo sapiens (human); hsa04510 Focal adhesion - Homo sapiens (human); hsa04512 ECM-receptor interaction - Homo sapiens (human); hsa04611 Platelet activation - Homo sapiens (human); hsa04926 Relaxin signaling pathway - Homo sapiens (human); hsa04933 AGE-RAGE signaling pathway in diabetic complications - Homo sapiens (human); hsa04974 Protein digestion and abso…	IPR000885;	Fibrillar collagen, C-terminal;
P18084	Integrin beta-5 OS=Homo sapiens OX=9606 GN=ITGB5 PE=1 SV=1	3.655	Up	6.4483e-05	ITGB5	88.053	4.6	extracellular	GO:0044085 cellular component biogenesis; GO:0044409 entry into host; GO:0044700 single organism signaling; GO:0003012 muscle system process; GO:0007166 cell surface receptor signaling pathway; GO:0048869 cellular developmental process; GO:0071560 cellular response to transforming growth factor beta stimulus; GO:0030038 contractile actin filament bundle assembly; GO:0044699 single-organism proces…	GO:0016020 membrane; GO:0044421 extracellular region part; GO:0098636 protein complex involved in cell adhesion; GO:0031410 cytoplasmic vesicle; GO:0030054 cell junction; GO:0071944 cell periphery; GO:0098796 membrane protein complex; GO:0005737 cytoplasm; GO:0031982 vesicle; GO:0031224 intrinsic component of membrane; GO:0032991 macromolecular complex; GO:0044424 intracellular part; GO:0005887 i…	GO:0060089 molecular transducer activity; GO:0005515 protein binding; GO:0004872 receptor activity; GO:0001618 virus receptor activity; GO:0005488 binding;	K06588	ITGB5; integrin beta 5	hsa04145 Phagosome - Homo sapiens (human); hsa04151 PI3K-Akt signaling pathway - Homo sapiens (human); hsa04510 Focal adhesion - Homo sapiens (human); hsa04512 ECM-receptor interaction - Homo sapiens (human); hsa04810 Regulation of actin cytoskeleton - Homo sapiens (human); hsa05165 Human papillomavirus infection - Homo sapiens (human); hsa05205 Proteoglycans in cancer - Homo sapiens (human); hsa…	IPR032695; IPR033760; IPR002369; IPR016201; IPR012896; IPR014836; IPR002035;	Integrin domain; Integrin beta N-terminal; Integrin beta subunit, VWA domain; PSI domain; Integrin beta subunit, tail; Integrin beta subunit, cytoplasmic domain; von Willebrand factor, type A;
O43583	Density-regulated protein OS=Homo sapiens OX=9606 GN=DENR PE=1 SV=2	0.536	Down	0.0133609	DENR	22.092	31.8	cytoplasm	GO:0044085 cellular component biogenesis; GO:0016043 cellular component organization; GO:0022613 ribonucleoprotein complex biogenesis; GO:0006518 peptide metabolic process; GO:0022618 ribonucleoprotein complex assembly; GO:0044267 cellular protein metabolic process; GO:0044699 single-organism process; GO:1903008 organelle disassembly; GO:0002188 translation reinitiation; GO:0009058 biosynthetic p…	GO:0070992 translation initiation complex; GO:0044464 cell part; GO:0005622 intracellular; GO:0005737 cytoplasm; GO:0032991 macromolecular complex; GO:0044424 intracellular part; GO:1990904 ribonucleoprotein complex; GO:0005623 cell; GO:0030529 intracellular ribonucleoprotein complex; GO:0044444 cytoplasmic part;	GO:0097159 organic cyclic compound binding; GO:1901363 heterocyclic compound binding; GO:0043022 ribosome binding; GO:0008135 translation factor activity, RNA binding; GO:0003729 mRNA binding; GO:0003723 RNA binding; GO:0005488 binding; GO:0003676 nucleic acid binding; GO:0044877 macromolecular complex binding; GO:0003743 translation initiation factor activity; GO:0005515 protein binding; GO:0043…				IPR001950;	SUI1 domain;
Q96J84	Kin of IRRE-like protein 1 OS=Homo sapiens OX=9606 GN=KIRREL1 PE=1 SV=2	2.416	Up	0.0187594	KIRREL1	83.535	7.5	extracellular	GO:0030833 regulation of actin filament polymerization; GO:0065008 regulation of biological quality; GO:0032273 positive regulation of protein polymerization; GO:0044699 single-organism process; GO:0030832 regulation of actin filament length; GO:0031400 negative regulation of protein modification process; GO:0051130 positive regulation of cellular component organization; GO:0022610 biological adh…	GO:0030425 dendrite; GO:0016020 membrane; GO:0044421 extracellular region part; GO:0030054 cell junction; GO:0098857 membrane microdomain; GO:0071944 cell periphery; GO:0005737 cytoplasm; GO:0031982 vesicle; GO:0031224 intrinsic component of membrane; GO:0044424 intracellular part; GO:0005911 cell-cell junction; GO:0005623 cell; GO:0070062 extracellular exosome; GO:0098590 plasma membrane region;…	GO:0005515 protein binding; GO:0008092 cytoskeletal protein binding; GO:0017022 myosin binding; GO:0005488 binding;				IPR003598; IPR007110; IPR013783; IPR013162; IPR003599; IPR013098;	Immunoglobulin subtype 2; Immunoglobulin-like domain; Immunoglobulin-like fold; CD80-like, immunoglobulin C2-set; Immunoglobulin subtype; Immunoglobulin I-set;
Q9Y5Y2	Cytosolic Fe-S cluster assembly factor NUBP2 OS=Homo sapiens OX=9606 GN=NUBP2 PE=1 SV=1	1.887	Up	0.0087447	NUBP2	28.825	24.4	mitochondria	GO:0006790 sulfur compound metabolic process; GO:0044085 cellular component biogenesis; GO:0051188 cofactor biosynthetic process; GO:0016043 cellular component organization; GO:0044763 single-organism cellular process; GO:0044699 single-organism process; GO:0009058 biosynthetic process; GO:0044237 cellular metabolic process; GO:0044249 cellular biosynthetic process; GO:0051186 cofactor metabolic …	GO:0043229 intracellular organelle; GO:0005929 cilium; GO:0000922 spindle pole; GO:0042995 cell projection; GO:0044450 microtubule organizing center part; GO:0043232 intracellular non-membrane-bounded organelle; GO:0044430 cytoskeletal part; GO:0005737 cytoplasm; GO:0044446 intracellular organelle part; GO:0044424 intracellular part; GO:0005623 cell; GO:0005819 spindle; GO:0044422 organelle part;…	GO:0005524 ATP binding; GO:1901265 nucleoside phosphate binding; GO:0001882 nucleoside binding; GO:0043167 ion binding; GO:0005515 protein binding; GO:0000166 nucleotide binding; GO:0051539 4 iron, 4 sulfur cluster binding; GO:0097159 organic cyclic compound binding; GO:1901363 heterocyclic compound binding; GO:0032549 ribonucleoside binding; GO:0097367 carbohydrate derivative binding; GO:0032553…				IPR027417;	P-loop containing nucleoside triphosphate hydrolase;
Q08426	Peroxisomal bifunctional enzyme OS=Homo sapiens OX=9606 GN=EHHADH PE=1 SV=3	1.574	Up	0.029481	EHHADH	79.494	3.3	mitochondria	GO:0034440 lipid oxidation; GO:0044267 cellular protein metabolic process; GO:0044699 single-organism process; GO:0044255 cellular lipid metabolic process; GO:0044237 cellular metabolic process; GO:0071704 organic substance metabolic process; GO:0008152 metabolic process; GO:0030258 lipid modification; GO:0043543 protein acylation; GO:0032787 monocarboxylic acid metabolic process; GO:0044248 cell…	GO:0043229 intracellular organelle; GO:0044439 peroxisomal part; GO:0005777 peroxisome; GO:0044446 intracellular organelle part; GO:0005737 cytoplasm; GO:0044438 microbody part; GO:0044424 intracellular part; GO:0005829 cytosol; GO:0005623 cell; GO:0044422 organelle part; GO:0005739 mitochondrion; GO:0031974 membrane-enclosed lumen; GO:0043231 intracellular membrane-bounded organelle; GO:0043226 …	GO:0005102 receptor binding; GO:0016829 lyase activity; GO:0016836 hydro-lyase activity; GO:0005515 protein binding; GO:0004165 dodecenoyl-CoA delta-isomerase activity; GO:0016835 carbon-oxygen lyase activity; GO:0004300 enoyl-CoA hydratase activity; GO:0016491 oxidoreductase activity; GO:0016614 oxidoreductase activity, acting on CH-OH group of donors; GO:0016616 oxidoreductase activity, acting …	K07514	EHHADH; enoyl-CoA hydratase / 3-hydroxyacyl-CoA dehydrogenase / 3,2-trans-enoyl-CoA isomerase [EC:4.2.1.17 1.1.1.35 5.3.3.8]	hsa00071 Fatty acid degradation - Homo sapiens (human); hsa00280 Valine, leucine and isoleucine degradation - Homo sapiens (human); hsa00310 Lysine degradation - Homo sapiens (human); hsa00380 Tryptophan metabolism - Homo sapiens (human); hsa00410 beta-Alanine metabolism - Homo sapiens (human); hsa00640 Propanoate metabolism - Homo sapiens (human); hsa00650 Butanoate metabolism - Homo sapiens (hu…	IPR029045; IPR013328; IPR008927; IPR016040; IPR006176; IPR006108;	ClpP/crotonase-like domain; 6-phosphogluconate dehydrogenase, domain 2; 6-phosphogluconate dehydrogenase C-terminal domain-like; NAD(P)-binding domain; 3-hydroxyacyl-CoA dehydrogenase, NAD binding; 3-hydroxyacyl-CoA dehydrogenase, C-terminal;
P00441	Superoxide dismutase [Cu-Zn] OS=Homo sapiens OX=9606 GN=SOD1 PE=1 SV=2	0.591	Down	0.0173766	SOD1	15.936	40.3	cytoplasm	GO:0044700 single organism signaling; GO:0002694 regulation of leukocyte activation; GO:0010941 regulation of cell death; GO:0048732 gland development; GO:0007272 ensheathment of neurons; GO:0022414 reproductive process; GO:0097332 response to antipsychotic drug; GO:0043523 regulation of neuron apoptotic process; GO:0046683 response to organophosphorus; GO:0044237 cellular metabolic process; GO:0…	GO:0030425 dendrite; GO:0044421 extracellular region part; GO:0099568 cytoplasmic region; GO:0005737 cytoplasm; GO:0032838 cell projection cytoplasm; GO:0043025 neuronal cell body; GO:0032991 macromolecular complex; GO:0005623 cell; GO:0044422 organelle part; GO:0070062 extracellular exosome; GO:0005654 nucleoplasm; GO:0032839 dendrite cytoplasm; GO:0043209 myelin sheath; GO:0005622 intracellular…	GO:0004784 superoxide dismutase activity; GO:0031267 small GTPase binding; GO:0017048 Rho GTPase binding; GO:0048365 Rac GTPase binding; GO:0019903 protein phosphatase binding; GO:0016721 oxidoreductase activity, acting on superoxide radicals as acceptor; GO:0051087 chaperone binding; GO:0043167 ion binding; GO:0046983 protein dimerization activity; GO:0016209 antioxidant activity; GO:0005515 pro…	K04565	SOD1; superoxide dismutase, Cu-Zn family [EC:1.15.1.1]	hsa04146 Peroxisome - Homo sapiens (human); hsa04213 Longevity regulating pathway - multiple species - Homo sapiens (human); hsa05014 Amyotrophic lateral sclerosis (ALS) - Homo sapiens (human); hsa05016 Huntington disease - Homo sapiens (human); hsa05020 Prion diseases - Homo sapiens (human);	IPR001424;	Superoxide dismutase, copper/zinc binding domain;
Q9C0H2	Protein tweety homolog 3 OS=Homo sapiens OX=9606 GN=TTYH3 PE=1 SV=3	1.557	Up	0.0035011	TTYH3	57.544	3.4	plasma membrane	GO:0098661 inorganic anion transmembrane transport; GO:0006820 anion transport; GO:0006810 transport; GO:0055085 transmembrane transport; GO:0034220 ion transmembrane transport; GO:0098660 inorganic ion transmembrane transport; GO:0006811 ion transport; GO:0006821 chloride transport; GO:0051179 localization; GO:0098656 anion transmembrane transport; GO:0015698 inorganic anion transport; GO:190247…	GO:0016020 membrane; GO:0044421 extracellular region part; GO:0071944 cell periphery; GO:0031982 vesicle; GO:0031224 intrinsic component of membrane; GO:0032991 macromolecular complex; GO:0005623 cell; GO:1902495 transmembrane transporter complex; GO:0016021 integral component of membrane; GO:0005576 extracellular region; GO:0005886 plasma membrane; GO:0043226 organelle; GO:0070062 extracellular …	GO:0022839 ion gated channel activity; GO:0015075 ion transmembrane transporter activity; GO:0022803 passive transmembrane transporter activity; GO:0061778 intracellular chloride channel activity; GO:0005253 anion channel activity; GO:0022892 substrate-specific transporter activity; GO:0005254 chloride channel activity; GO:0015267 channel activity; GO:0015103 inorganic anion transmembrane transpo…	K22641
Q9UII2	ATPase inhibitor, mitochondrial OS=Homo sapiens OX=9606 GN=ATP5IF1 PE=1 SV=1	0.42	Down	0.0032555	ATP5IF1	12.249	24.5	mitochondria	GO:0044085 cellular component biogenesis; GO:0010941 regulation of cell death; GO:0065008 regulation of biological quality; GO:0032270 positive regulation of cellular protein metabolic process; GO:0002262 myeloid cell homeostasis; GO:1903533 regulation of protein targeting; GO:0010821 regulation of mitochondrion organization; GO:0044237 cellular metabolic process; GO:0008285 negative regulation o…	GO:0043226 organelle; GO:0043231 intracellular membrane-bounded organelle; GO:0043229 intracellular organelle; GO:0044464 cell part; GO:0005622 intracellular; GO:0005737 cytoplasm; GO:0009986 cell surface; GO:0044424 intracellular part; GO:0043227 membrane-bounded organelle; GO:0005623 cell; GO:0005739 mitochondrion; GO:0044444 cytoplasmic part;	GO:0042030 ATPase inhibitor activity; GO:0042802 identical protein binding; GO:0043532 angiostatin binding; GO:0030234 enzyme regulator activity; GO:0051117 ATPase binding; GO:0042803 protein homodimerization activity; GO:0005488 binding; GO:0060589 nucleoside-triphosphatase regulator activity; GO:0046983 protein dimerization activity; GO:0005515 protein binding; GO:0060590 ATPase regulator activ…	K22255	ATPIF1; ATPase inhibitor, mitochondrial
H7BZ55	Putative ciliary rootlet coiled-coil protein 2 OS=Homo sapiens OX=9606 GN=CROCC2 PE=5 SV=3	2.582	Up	4.6576e-06	CROCC2	185.87	0.5	cytoplasm,nucleus
P02452	Collagen alpha-1(I) chain OS=Homo sapiens OX=9606 GN=COL1A1 PE=1 SV=5	9.267	Up	1.147e-07	COL1A1	138.94	62	extracellular	GO:0044700 single organism signaling; GO:0044085 cellular component biogenesis; GO:0030199 collagen fibril organization; GO:0043009 chordate embryonic development; GO:0009891 positive regulation of biosynthetic process; GO:0046683 response to organophosphorus; GO:0008152 metabolic process; GO:0065003 macromolecular complex assembly; GO:0060343 trabecula formation; GO:0090263 positive regulation o…	GO:0005584 collagen type I trimer; GO:0005783 endoplasmic reticulum; GO:0005615 extracellular space; GO:0098643 banded collagen fibril; GO:0044421 extracellular region part; GO:0031410 cytoplasmic vesicle; GO:0031982 vesicle; GO:0005737 cytoplasm; GO:0005583 fibrillar collagen trimer; GO:0032991 macromolecular complex; GO:0099512 supramolecular fiber; GO:0044424 intracellular part; GO:0099080 sup…	GO:0005201 extracellular matrix structural constituent; GO:0042802 identical protein binding; GO:0019838 growth factor binding; GO:0005488 binding; GO:0043167 ion binding; GO:0048407 platelet-derived growth factor binding; GO:0046872 metal ion binding; GO:0043169 cation binding; GO:0005515 protein binding; GO:0005198 structural molecule activity;	K06236	COL1A; collagen, type I, alpha	hsa04151 PI3K-Akt signaling pathway - Homo sapiens (human); hsa04510 Focal adhesion - Homo sapiens (human); hsa04512 ECM-receptor interaction - Homo sapiens (human); hsa04611 Platelet activation - Homo sapiens (human); hsa04926 Relaxin signaling pathway - Homo sapiens (human); hsa04933 AGE-RAGE signaling pathway in diabetic complications - Homo sapiens (human); hsa04974 Protein digestion and abso…	IPR001007; IPR000885;	VWFC domain; Fibrillar collagen, C-terminal;
Q9Y291	28S ribosomal protein S33, mitochondrial OS=Homo sapiens OX=9606 GN=MRPS33 PE=1 SV=1	0.593	Down	0.04222	MRPS33	12.629	8.5	nucleus	GO:0016043 cellular component organization; GO:0006518 peptide metabolic process; GO:0044267 cellular protein metabolic process; GO:0044699 single-organism process; GO:0009058 biosynthetic process; GO:1901566 organonitrogen compound biosynthetic process; GO:0044237 cellular metabolic process; GO:0043241 protein complex disassembly; GO:0071704 organic substance metabolic process; GO:0008152 metabo…	GO:0016020 membrane; GO:0031090 organelle membrane; GO:0015935 small ribosomal subunit; GO:0005737 cytoplasm; GO:0032991 macromolecular complex; GO:0044424 intracellular part; GO:0005623 cell; GO:0000313 organellar ribosome; GO:0044422 organelle part; GO:0043228 non-membrane-bounded organelle; GO:0005740 mitochondrial envelope; GO:0031974 membrane-enclosed lumen; GO:0070013 intracellular organell…	GO:0003735 structural constituent of ribosome; GO:0005198 structural molecule activity;	K17411	MRPS33; small subunit ribosomal protein S33
P61247	40S ribosomal protein S3a OS=Homo sapiens OX=9606 GN=RPS3A PE=1 SV=2	0.526	Down	2.1552e-05	RPS3A	29.945	62.1	nucleus	GO:0044085 cellular component biogenesis; GO:0022613 ribonucleoprotein complex biogenesis; GO:0010941 regulation of cell death; GO:0072594 establishment of protein localization to organelle; GO:0006518 peptide metabolic process; GO:0048869 cellular developmental process; GO:0044699 single-organism process; GO:0009058 biosynthetic process; GO:0044764 multi-organism cellular process; GO:0044237 cel…	GO:0044421 extracellular region part; GO:0005783 endoplasmic reticulum; GO:0030054 cell junction; GO:0015935 small ribosomal subunit; GO:0031982 vesicle; GO:0005737 cytoplasm; GO:0032991 macromolecular complex; GO:0044424 intracellular part; GO:0005623 cell; GO:0044422 organelle part; GO:0043228 non-membrane-bounded organelle; GO:0070062 extracellular exosome; GO:0031974 membrane-enclosed lumen; …	GO:0097159 organic cyclic compound binding; GO:1901363 heterocyclic compound binding; GO:0003723 RNA binding; GO:0005488 binding; GO:0003676 nucleic acid binding; GO:0005515 protein binding; GO:0005198 structural molecule activity; GO:0003735 structural constituent of ribosome;	K02984	RP-S3Ae, RPS3A; small subunit ribosomal protein S3Ae	hsa03010 Ribosome - Homo sapiens (human);
Q9HD67	Unconventional myosin-X OS=Homo sapiens OX=9606 GN=MYO10 PE=1 SV=3	0.266	Down	0.009015	MYO10	237.34	0.8	nucleus	GO:0044700 single organism signaling; GO:0050794 regulation of cellular process; GO:0046907 intracellular transport; GO:0065008 regulation of biological quality; GO:0002429 immune response-activating cell surface receptor signaling pathway; GO:0007166 cell surface receptor signaling pathway; GO:0002252 immune effector process; GO:0060491 regulation of cell projection assembly; GO:0038094 Fc-gamma…	GO:0016020 membrane; GO:0005938 cell cortex; GO:0071944 cell periphery; GO:0005737 cytoplasm; GO:0099568 cytoplasmic region; GO:0043025 neuronal cell body; GO:0032991 macromolecular complex; GO:0044424 intracellular part; GO:0098858 actin-based cell projection; GO:0005623 cell; GO:0044422 organelle part; GO:0043228 non-membrane-bounded organelle; GO:0031974 membrane-enclosed lumen; GO:0005856 cyt…	GO:0051015 actin filament binding; GO:0060002 plus-end directed microfilament motor activity; GO:1901265 nucleoside phosphate binding; GO:0003774 motor activity; GO:0016817 hydrolase activity, acting on acid anhydrides; GO:0016787 hydrolase activity; GO:0005515 protein binding; GO:0016887 ATPase activity; GO:1901363 heterocyclic compound binding; GO:0097159 organic cyclic compound binding; GO:000…	K12559	MYO10; myosin X	hsa04666 Fc gamma R-mediated phagocytosis - Homo sapiens (human);	IPR019748; IPR027417; IPR000857; IPR001849; IPR019749; IPR031971; IPR011993; IPR001609; IPR000299; IPR000159; IPR014352;	FERM central domain; P-loop containing nucleoside triphosphate hydrolase; MyTH4 domain; Pleckstrin homology domain; Band 4.1 domain; Unconventional myosin-X, coiled coil domain; PH domain-like; Myosin head, motor domain; FERM domain; Ras-associating (RA) domain; FERM/acyl-CoA-binding protein, 3-helical bundle;
O14981	TATA-binding protein-associated factor 172 OS=Homo sapiens OX=9606 GN=BTAF1 PE=1 SV=2	1.757	Up	0.00145774	BTAF1	206.89	0.7	plasma membrane	GO:0050794 regulation of cellular process; GO:0060255 regulation of macromolecule metabolic process; GO:0019219 regulation of nucleobase-containing compound metabolic process; GO:0048523 negative regulation of cellular process; GO:0031324 negative regulation of cellular metabolic process; GO:0048519 negative regulation of biological process; GO:0051253 negative regulation of RNA metabolic process…	GO:0031974 membrane-enclosed lumen; GO:0043231 intracellular membrane-bounded organelle; GO:0043226 organelle; GO:0043229 intracellular organelle; GO:0005634 nucleus; GO:0005654 nucleoplasm; GO:0070013 intracellular organelle lumen; GO:0044464 cell part; GO:0005622 intracellular; GO:0044446 intracellular organelle part; GO:0031981 nuclear lumen; GO:0044424 intracellular part; GO:0043227 membrane-…	GO:1901265 nucleoside phosphate binding; GO:0016817 hydrolase activity, acting on acid anhydrides; GO:0016787 hydrolase activity; GO:0003700 transcription factor activity, sequence-specific DNA binding; GO:1901363 heterocyclic compound binding; GO:0097159 organic cyclic compound binding; GO:0016462 pyrophosphatase activity; GO:0003824 catalytic activity; GO:0032553 ribonucleotide binding; GO:0005…	K15192	BTAF1, MOT1; TATA-binding protein-associated factor [EC:3.6.4.-]		IPR011989; IPR027417; IPR014001; IPR016024; IPR001650; IPR022707; IPR000330;	Armadillo-like helical; P-loop containing nucleoside triphosphate hydrolase; Helicase superfamily 1/2, ATP-binding domain; Armadillo-type fold; Helicase, C-terminal; Domain of unknown function DUF3535; SNF2-related, N-terminal domain;
Q8NC44	Reticulophagy regulator 2 OS=Homo sapiens OX=9606 GN=RETREG2 PE=1 SV=3	2.125	Up	7.7168e-05	RETREG2	57.829	4.6	plasma membrane		GO:0031224 intrinsic component of membrane; GO:0016020 membrane; GO:0016021 integral component of membrane; GO:0044425 membrane part;
Q9Y6R0	Numb-like protein OS=Homo sapiens OX=9606 GN=NUMBL PE=1 SV=1	1.587	Up	0.00022036	NUMBL	64.891	22	nucleus	GO:0044700 single organism signaling; GO:0048103 somatic stem cell division; GO:0007166 cell surface receptor signaling pathway; GO:0007420 brain development; GO:0048869 cellular developmental process; GO:0048666 neuron development; GO:0045216 cell-cell junction organization; GO:0032989 cellular component morphogenesis; GO:0022008 neurogenesis; GO:0044699 single-organism process; GO:0071345 cellu…	GO:0044424 intracellular part; GO:0005623 cell; GO:0044464 cell part; GO:0005622 intracellular; GO:0005737 cytoplasm;	GO:0005515 protein binding; GO:0005488 binding;	K06057	NUMBL; numb	hsa04330 Notch signaling pathway - Homo sapiens (human);	IPR010449; IPR011993; IPR006020;	NUMB domain; PH domain-like; PTB/PI domain;
Q15427	Splicing factor 3B subunit 4 OS=Homo sapiens OX=9606 GN=SF3B4 PE=1 SV=1	0.542	Down	0.0188026	SF3B4	44.385	3.3	nucleus	GO:0033120 positive regulation of RNA splicing; GO:0050794 regulation of cellular process; GO:0050685 positive regulation of mRNA processing; GO:0006725 cellular aromatic compound metabolic process; GO:0060255 regulation of macromolecule metabolic process; GO:0019219 regulation of nucleobase-containing compound metabolic process; GO:0044237 cellular metabolic process; GO:0071704 organic substance…	GO:0043229 intracellular organelle; GO:0044446 intracellular organelle part; GO:0032991 macromolecular complex; GO:0031981 nuclear lumen; GO:0044424 intracellular part; GO:0005681 spliceosomal complex; GO:0005623 cell; GO:0044422 organelle part; GO:0043226 organelle; GO:0043231 intracellular membrane-bounded organelle; GO:0031974 membrane-enclosed lumen; GO:0005654 nucleoplasm; GO:0005634 nucleus…	GO:0097159 organic cyclic compound binding; GO:1901363 heterocyclic compound binding; GO:0003723 RNA binding; GO:1901265 nucleoside phosphate binding; GO:0005488 binding; GO:0003676 nucleic acid binding; GO:0005515 protein binding; GO:0000166 nucleotide binding; GO:0036094 small molecule binding;	K12831	SF3B4, SAP49; splicing factor 3B subunit 4	hsa03040 Spliceosome - Homo sapiens (human);	IPR034158; IPR000504; IPR012677; IPR034159;	SF3B4, RNA recognition motif 1; RNA recognition motif domain; Nucleotide-binding alpha-beta plait domain; SF3B4, RNA recognition motif 2;
Q6UWP8	Suprabasin OS=Homo sapiens OX=9606 GN=SBSN PE=1 SV=2	6.391	Up	0.00090275	SBSN	60.54	15.3	extracellular		GO:0031012 extracellular matrix; GO:0070062 extracellular exosome; GO:0043226 organelle; GO:0044421 extracellular region part; GO:0031982 vesicle; GO:1903561 extracellular vesicle; GO:0043227 membrane-bounded organelle; GO:0005576 extracellular region; GO:0043230 extracellular organelle;
Q86TB9	Protein PAT1 homolog 1 OS=Homo sapiens OX=9606 GN=PATL1 PE=1 SV=2	2.068	Up	0.0040552	PATL1	86.849	4.3	nucleus	GO:0044085 cellular component biogenesis; GO:0016043 cellular component organization; GO:0022613 ribonucleoprotein complex biogenesis; GO:0022618 ribonucleoprotein complex assembly; GO:0006725 cellular aromatic compound metabolic process; GO:0060255 regulation of macromolecule metabolic process; GO:0048519 negative regulation of biological process; GO:0044237 cellular metabolic process; GO:007170…	GO:0000932 P-body; GO:0005737 cytoplasm; GO:0032991 macromolecular complex; GO:0044424 intracellular part; GO:0005623 cell; GO:0016604 nuclear body; GO:0036464 cytoplasmic ribonucleoprotein granule; GO:0044422 organelle part; GO:0043228 non-membrane-bounded organelle; GO:0031974 membrane-enclosed lumen; GO:0005654 nucleoplasm; GO:0016605 PML body; GO:0070013 intracellular organelle lumen; GO:0016…	GO:0097159 organic cyclic compound binding; GO:1901363 heterocyclic compound binding; GO:0003723 RNA binding; GO:0008187 poly-pyrimidine tract binding; GO:0005488 binding; GO:0003676 nucleic acid binding; GO:0005515 protein binding; GO:0070717 poly-purine tract binding; GO:0008266 poly(U) RNA binding; GO:0034046 poly(G) binding; GO:0003727 single-stranded RNA binding;	K12617	PATL1, PAT1; DNA topoisomerase 2-associated protein PAT1	hsa03018 RNA degradation - Homo sapiens (human);
O15121	Sphingolipid delta(4)-desaturase DES1 OS=Homo sapiens OX=9606 GN=DEGS1 PE=1 SV=1	3.311	Up	0.0149782	DEGS1	37.866	5	plasma membrane	GO:0045321 leukocyte activation; GO:0016053 organic acid biosynthetic process; GO:0006643 membrane lipid metabolic process; GO:0006672 ceramide metabolic process; GO:0044699 single-organism process; GO:0044255 cellular lipid metabolic process; GO:0009058 biosynthetic process; GO:0044237 cellular metabolic process; GO:0051234 establishment of localization; GO:0008610 lipid biosynthetic process; GO…	GO:0016020 membrane; GO:0042175 nuclear outer membrane-endoplasmic reticulum membrane network; GO:0005783 endoplasmic reticulum; GO:0031090 organelle membrane; GO:0031410 cytoplasmic vesicle; GO:0071944 cell periphery; GO:0031982 vesicle; GO:0005737 cytoplasm; GO:0044433 cytoplasmic vesicle part; GO:0031224 intrinsic component of membrane; GO:0044424 intracellular part; GO:0005887 integral compon…	GO:0009055 electron carrier activity; GO:0042284 sphingolipid delta-4 desaturase activity; GO:0016705 oxidoreductase activity, acting on paired donors, with incorporation or reduction of molecular oxygen; GO:0003824 catalytic activity; GO:0016491 oxidoreductase activity;	K04712	DEGS; sphingolipid 4-desaturase/C4-monooxygenase [EC:1.14.19.17 1.14.18.5]	hsa00600 Sphingolipid metabolism - Homo sapiens (human); hsa01100 Metabolic pathways - Homo sapiens (human); hsa04071 Sphingolipid signaling pathway - Homo sapiens (human);	IPR013866; IPR005804;	Sphingolipid delta4-desaturase, N-terminal; Fatty acid desaturase domain;
Q3ZAQ7	Vacuolar ATPase assembly integral membrane protein VMA21 OS=Homo sapiens OX=9606 GN=VMA21 PE=1 SV=1	1.796	Up	0.034237	VMA21	11.354	11.9	plasma membrane	GO:0044085 cellular component biogenesis; GO:0016043 cellular component organization; GO:0034622 cellular macromolecular complex assembly; GO:0071822 protein complex subunit organization; GO:0070072 vacuolar proton-transporting V-type ATPase complex assembly; GO:0070070 proton-transporting V-type ATPase complex assembly; GO:0043933 macromolecular complex subunit organization; GO:0051336 regulatio…	GO:0030658 transport vesicle membrane; GO:0016020 membrane; GO:0042175 nuclear outer membrane-endoplasmic reticulum membrane network; GO:0005783 endoplasmic reticulum; GO:0031090 organelle membrane; GO:0031410 cytoplasmic vesicle; GO:0098796 membrane protein complex; GO:0031982 vesicle; GO:0005737 cytoplasm; GO:0044433 cytoplasmic vesicle part; GO:0031224 intrinsic component of membrane; GO:00329…
Q9Y2W2	WW domain-binding protein 11 OS=Homo sapiens OX=9606 GN=WBP11 PE=1 SV=1	1.585	Up	0.00122124	WBP11	69.997	9.7	nucleus	GO:0044085 cellular component biogenesis; GO:0022613 ribonucleoprotein complex biogenesis; GO:1903955 positive regulation of protein targeting to mitochondrion; GO:1903533 regulation of protein targeting; GO:0010821 regulation of mitochondrion organization; GO:0044237 cellular metabolic process; GO:1903749 positive regulation of establishment of protein localization to mitochondrion; GO:0051130 p…	GO:0043229 intracellular organelle; GO:0044446 intracellular organelle part; GO:0005737 cytoplasm; GO:0031981 nuclear lumen; GO:0032991 macromolecular complex; GO:0044424 intracellular part; GO:0005681 spliceosomal complex; GO:0016604 nuclear body; GO:0005829 cytosol; GO:0005623 cell; GO:0044422 organelle part; GO:0031974 membrane-enclosed lumen; GO:0043226 organelle; GO:0043231 intracellular mem…	GO:0097159 organic cyclic compound binding; GO:1901363 heterocyclic compound binding; GO:0003677 DNA binding; GO:0003723 RNA binding; GO:0030234 enzyme regulator activity; GO:0019888 protein phosphatase regulator activity; GO:0019208 phosphatase regulator activity; GO:0005488 binding; GO:0003676 nucleic acid binding; GO:0003697 single-stranded DNA binding; GO:0050699 WW domain binding; GO:0005515…	K12866	WBP11, NPWBP; WW domain-binding protein 11	hsa03040 Spliceosome - Homo sapiens (human);
Q8N6G6	ADAMTS-like protein 1 OS=Homo sapiens OX=9606 GN=ADAMTSL1 PE=1 SV=4	4.991	Up	1.7852e-06	ADAMTSL1	193.41	1.3	extracellular	GO:0043413 macromolecule glycosylation; GO:0036065 fucosylation; GO:0044267 cellular protein metabolic process; GO:0044699 single-organism process; GO:0009058 biosynthetic process; GO:0044237 cellular metabolic process; GO:0071704 organic substance metabolic process; GO:0008152 metabolic process; GO:1901137 carbohydrate derivative biosynthetic process; GO:1901135 carbohydrate derivative metabolic…	GO:0005788 endoplasmic reticulum lumen; GO:0043229 intracellular organelle; GO:0044421 extracellular region part; GO:0005783 endoplasmic reticulum; GO:0005737 cytoplasm; GO:0044446 intracellular organelle part; GO:0012505 endomembrane system; GO:0044424 intracellular part; GO:0005623 cell; GO:0005576 extracellular region; GO:0044422 organelle part; GO:0031012 extracellular matrix; GO:0043226 orga…	GO:0008233 peptidase activity; GO:0046914 transition metal ion binding; GO:0003824 catalytic activity; GO:0005488 binding; GO:0043167 ion binding; GO:0043169 cation binding; GO:0046872 metal ion binding; GO:0070011 peptidase activity, acting on L-amino acid peptides; GO:0016787 hydrolase activity; GO:0005515 protein binding; GO:0008237 metallopeptidase activity; GO:0008270 zinc ion binding;				IPR003598; IPR007110; IPR013783; IPR003599; IPR010909; IPR013098;	Immunoglobulin subtype 2; Immunoglobulin-like domain; Immunoglobulin-like fold; Immunoglobulin subtype; PLAC; Immunoglobulin I-set;
Q9NXF1	Testis-expressed protein 10 OS=Homo sapiens OX=9606 GN=TEX10 PE=1 SV=2	1.855	Up	0.00173654	TEX10	105.67	4.7	plasma membrane	GO:0016072 rRNA metabolic process; GO:0006396 RNA processing; GO:0034470 ncRNA processing; GO:0044085 cellular component biogenesis; GO:0022613 ribonucleoprotein complex biogenesis; GO:0006725 cellular aromatic compound metabolic process; GO:0006807 nitrogen compound metabolic process; GO:0042254 ribosome biogenesis; GO:1901360 organic cyclic compound metabolic process; GO:0044238 primary metabol…	GO:0016020 membrane; GO:0031090 organelle membrane; GO:0005737 cytoplasm; GO:0031224 intrinsic component of membrane; GO:0032991 macromolecular complex; GO:0044424 intracellular part; GO:0005623 cell; GO:0097344 Rix1 complex; GO:0044422 organelle part; GO:0043228 non-membrane-bounded organelle; GO:0031974 membrane-enclosed lumen; GO:1902494 catalytic complex; GO:0005654 nucleoplasm; GO:0031965 nu…	GO:0005515 protein binding; GO:0005488 binding;	K14827	IPI1, TEX10; pre-rRNA-processing protein IPI1		IPR011989; IPR016024;	Armadillo-like helical; Armadillo-type fold;
Q8NBQ5	Estradiol 17-beta-dehydrogenase 11 OS=Homo sapiens OX=9606 GN=HSD17B11 PE=1 SV=3	0.64	Down	0.0178045	HSD17B11	32.935	15	endoplasmic reticulum	GO:0042446 hormone biosynthetic process; GO:0065008 regulation of biological quality; GO:0006710 androgen catabolic process; GO:0044699 single-organism process; GO:0009058 biosynthetic process; GO:0006703 estrogen biosynthetic process; GO:0044237 cellular metabolic process; GO:0071704 organic substance metabolic process; GO:0008610 lipid biosynthetic process; GO:0008209 androgen metabolic process…	GO:0043226 organelle; GO:0043229 intracellular organelle; GO:0043232 intracellular non-membrane-bounded organelle; GO:0044464 cell part; GO:0005622 intracellular; GO:0005737 cytoplasm; GO:0044424 intracellular part; GO:0005829 cytosol; GO:0005811 lipid particle; GO:0005623 cell; GO:0005576 extracellular region; GO:0044444 cytoplasmic part; GO:0043228 non-membrane-bounded organelle;	GO:0016614 oxidoreductase activity, acting on CH-OH group of donors; GO:0016229 steroid dehydrogenase activity; GO:0016616 oxidoreductase activity, acting on the CH-OH group of donors, NAD or NADP as acceptor; GO:0004303 estradiol 17-beta-dehydrogenase activity; GO:0033764 steroid dehydrogenase activity, acting on the CH-OH group of donors, NAD or NADP as acceptor; GO:0003824 catalytic activity; …				IPR016040;	NAD(P)-binding domain;
Q9BYB4	Guanine nucleotide-binding protein subunit beta-like protein 1 OS=Homo sapiens OX=9606 GN=GNB1L PE=1 SV=2	1.858	Up	2.342e-05	GNB1L	35.618	8.3	cytoplasm	GO:0050794 regulation of cellular process; GO:0044700 single organism signaling; GO:0051716 cellular response to stimulus; GO:0035556 intracellular signal transduction; GO:0044699 single-organism process; GO:0023052 signaling; GO:0050896 response to stimulus; GO:0051704 multi-organism process; GO:0007186 G-protein coupled receptor signaling pathway; GO:0007610 behavior; GO:0007165 signal transduc…	GO:0016020 membrane; GO:0044459 plasma membrane part; GO:0005622 intracellular; GO:0044425 membrane part; GO:0044464 cell part; GO:0071944 cell periphery; GO:0005737 cytoplasm; GO:0044424 intracellular part; GO:0005623 cell; GO:0009898 cytoplasmic side of plasma membrane; GO:0098562 cytoplasmic side of membrane; GO:0005886 plasma membrane; GO:0098552 side of membrane;	GO:0005515 protein binding; GO:0005488 binding;				IPR017986; IPR015943;	WD40-repeat-containing domain; WD40/YVTN repeat-like-containing domain;
P35443	Thrombospondin-4 OS=Homo sapiens OX=9606 GN=THBS4 PE=1 SV=2	18.143	Up	2.8082e-06	THBS4	105.87	7.1	extracellular	GO:0051093 negative regulation of developmental process; GO:0030335 positive regulation of cell migration; GO:0032270 positive regulation of cellular protein metabolic process; GO:0051674 localization of cell; GO:0040017 positive regulation of locomotion; GO:0071603 endothelial cell-cell adhesion; GO:0051241 negative regulation of multicellular organismal process; GO:0044699 single-organism proce…	GO:0043229 intracellular organelle; GO:0005615 extracellular space; GO:0044421 extracellular region part; GO:0005783 endoplasmic reticulum; GO:0031982 vesicle; GO:0005737 cytoplasm; GO:0016529 sarcoplasmic reticulum; GO:0012505 endomembrane system; GO:0044424 intracellular part; GO:0016528 sarcoplasm; GO:0005623 cell; GO:0044420 extracellular matrix component; GO:0005576 extracellular region; GO:…	GO:0008083 growth factor activity; GO:0005102 receptor binding; GO:0043167 ion binding; GO:0044877 macromolecular complex binding; GO:0005515 protein binding; GO:0005178 integrin binding; GO:0008201 heparin binding; GO:1901681 sulfur compound binding; GO:0050839 cell adhesion molecule binding; GO:0097367 carbohydrate derivative binding; GO:0005488 binding; GO:0046872 metal ion binding; GO:0043169…	K04659	THBS2S; thrombospondin 2/3/4/5	hsa04145 Phagosome - Homo sapiens (human); hsa04151 PI3K-Akt signaling pathway - Homo sapiens (human); hsa04510 Focal adhesion - Homo sapiens (human); hsa04512 ECM-receptor interaction - Homo sapiens (human); hsa05144 Malaria - Homo sapiens (human); hsa05165 Human papillomavirus infection - Homo sapiens (human);	IPR024665; IPR008859; IPR001881; IPR000742; IPR001791; IPR013320;	Thrombospondin/cartilage oligomeric matrix protein, coiled-coil domain; Thrombospondin, C-terminal; EGF-like calcium-binding domain; EGF-like domain; Laminin G domain; Concanavalin A-like lectin/glucanase domain;
Q08431	Lactadherin OS=Homo sapiens OX=9606 GN=MFGE8 PE=1 SV=3	12.001	Up	8.1616e-08	MFGE8	43.104	57.1	extracellular	GO:0060627 regulation of vesicle-mediated transport; GO:2000425 regulation of apoptotic cell clearance; GO:0001568 blood vessel development; GO:0022414 reproductive process; GO:0044699 single-organism process; GO:0044764 multi-organism cellular process; GO:0044237 cellular metabolic process; GO:0051234 establishment of localization; GO:0006909 phagocytosis; GO:0051130 positive regulation of cellu…	GO:0016020 membrane; GO:0005615 extracellular space; GO:0044421 extracellular region part; GO:0009897 external side of plasma membrane; GO:0019898 extrinsic component of membrane; GO:0071944 cell periphery; GO:0031982 vesicle; GO:0019897 extrinsic component of plasma membrane; GO:0005623 cell; GO:0005576 extracellular region; GO:0005886 plasma membrane; GO:0070062 extracellular exosome; GO:004322…	GO:0050839 cell adhesion molecule binding; GO:0072341 modified amino acid binding; GO:0005102 receptor binding; GO:0005488 binding; GO:0005543 phospholipid binding; GO:0043167 ion binding; GO:0044877 macromolecular complex binding; GO:0008289 lipid binding; GO:0043168 anion binding; GO:0005515 protein binding; GO:0005178 integrin binding; GO:0008429 phosphatidylethanolamine binding; GO:0001786 ph…	K17253	MFGE8; lactadherin		IPR000421; IPR000742; IPR008979;	Coagulation factor 5/8 C-terminal domain; EGF-like domain; Galactose-binding domain-like;
Q8N806	Putative E3 ubiquitin-protein ligase UBR7 OS=Homo sapiens OX=9606 GN=UBR7 PE=1 SV=2	0.586	Down	0.0045994	UBR7	47.998	15.1	cytoplasm,nucleus	GO:0008152 metabolic process; GO:0032446 protein modification by small protein conjugation; GO:0016567 protein ubiquitination; GO:0044260 cellular macromolecule metabolic process; GO:0044267 cellular protein metabolic process; GO:0006464 cellular protein modification process; GO:0043170 macromolecule metabolic process; GO:0019538 protein metabolic process; GO:0070647 protein modification by small…		GO:0046914 transition metal ion binding; GO:0003824 catalytic activity; GO:0005488 binding; GO:0043167 ion binding; GO:0043169 cation binding; GO:0046872 metal ion binding; GO:0008270 zinc ion binding; GO:0016740 transferase activity;	K11979	UBR7; E3 ubiquitin-protein ligase UBR7 [EC:2.3.2.27]		IPR013083; IPR011011; IPR003126;	Zinc finger, RING/FYVE/PHD-type; Zinc finger, FYVE/PHD-type; Zinc finger, UBR-type;
Q9P003	Protein cornichon homolog 4 OS=Homo sapiens OX=9606 GN=CNIH4 PE=1 SV=1	2.101	Up	0.0026586	CNIH4	16.093	14.4	plasma membrane	GO:0045184 establishment of protein localization; GO:0006810 transport; GO:0046907 intracellular transport; GO:0051649 establishment of localization in cell; GO:0016192 vesicle-mediated transport; GO:0048193 Golgi vesicle transport; GO:0071702 organic substance transport; GO:0008104 protein localization; GO:0033036 macromolecule localization; GO:0051179 localization; GO:0006888 ER to Golgi vesicl…	GO:0043229 intracellular organelle; GO:0016020 membrane; GO:0005783 endoplasmic reticulum; GO:0005737 cytoplasm; GO:0031224 intrinsic component of membrane; GO:0012505 endomembrane system; GO:0044424 intracellular part; GO:0005623 cell; GO:0016021 integral component of membrane; GO:0043231 intracellular membrane-bounded organelle; GO:0043226 organelle; GO:0044425 membrane part; GO:0005622 intrace…	GO:0005102 receptor binding; GO:0048020 CCR chemokine receptor binding; GO:0005488 binding; GO:0042379 chemokine receptor binding; GO:0005126 cytokine receptor binding; GO:0005515 protein binding; GO:0001664 G-protein coupled receptor binding; GO:0031730 CCR5 chemokine receptor binding;	K20368	CNIH, ERV14; protein cornichon
Q01581	Hydroxymethylglutaryl-CoA synthase, cytoplasmic OS=Homo sapiens OX=9606 GN=HMGCS1 PE=1 SV=2	2.364	Up	0.00051676	HMGCS1	57.293	7.3	cytoplasm	GO:0048732 gland development; GO:0022414 reproductive process; GO:0006066 alcohol metabolic process; GO:0007420 brain development; GO:0008584 male gonad development; GO:0044699 single-organism process; GO:0044255 cellular lipid metabolic process; GO:0009058 biosynthetic process; GO:0033197 response to vitamin E; GO:0044237 cellular metabolic process; GO:0008610 lipid biosynthetic process; GO:0008…	GO:0044464 cell part; GO:0005622 intracellular; GO:0005737 cytoplasm; GO:0044424 intracellular part; GO:0005623 cell; GO:0005829 cytosol; GO:0044444 cytoplasmic part;	GO:0004421 hydroxymethylglutaryl-CoA synthase activity; GO:0016746 transferase activity, transferring acyl groups; GO:0042802 identical protein binding; GO:0016853 isomerase activity; GO:0003824 catalytic activity; GO:0046912 transferase activity, transferring acyl groups, acyl groups converted into alkyl on transfer; GO:0042803 protein homodimerization activity; GO:0005488 binding; GO:0046983 pr…	K01641	E2.3.3.10; hydroxymethylglutaryl-CoA synthase [EC:2.3.3.10]	hsa00072 Synthesis and degradation of ketone bodies - Homo sapiens (human); hsa00280 Valine, leucine and isoleucine degradation - Homo sapiens (human); hsa00650 Butanoate metabolism - Homo sapiens (human); hsa00900 Terpenoid backbone biosynthesis - Homo sapiens (human); hsa01100 Metabolic pathways - Homo sapiens (human); hsa03320 PPAR signaling pathway - Homo sapiens (human);	IPR013746; IPR016039; IPR013528;	Hydroxymethylglutaryl-coenzyme A synthase C-terminal domain; Thiolase-like; Hydroxymethylglutaryl-coenzyme A synthase, N-terminal;
P55268	Laminin subunit beta-2 OS=Homo sapiens OX=9606 GN=LAMB2 PE=1 SV=2	2.969	Up	1.378e-07	LAMB2	195.98	24.6	extracellular	GO:0007528 neuromuscular junction development; GO:0007601 visual perception; GO:0048666 neuron development; GO:0048869 cellular developmental process; GO:0014037 Schwann cell differentiation; GO:0032989 cellular component morphogenesis; GO:0022008 neurogenesis; GO:0044699 single-organism process; GO:0014044 Schwann cell development; GO:0050877 neurological system process; GO:0009611 response to w…	GO:0043260 laminin-11 complex; GO:0005615 extracellular space; GO:0044421 extracellular region part; GO:0031982 vesicle; GO:0032991 macromolecular complex; GO:0044420 extracellular matrix component; GO:0005576 extracellular region; GO:0043083 synaptic cleft; GO:0045202 synapse; GO:0043256 laminin complex; GO:0005604 basement membrane; GO:0070062 extracellular exosome; GO:0043226 organelle; GO:000…	GO:0050839 cell adhesion molecule binding; GO:0005102 receptor binding; GO:0005488 binding; GO:0044877 macromolecular complex binding; GO:0005515 protein binding; GO:0005178 integrin binding; GO:0005198 structural molecule activity; GO:0032403 protein complex binding;	K06243	LAMB2; laminin, beta 2	hsa04151 PI3K-Akt signaling pathway - Homo sapiens (human); hsa04510 Focal adhesion - Homo sapiens (human); hsa04512 ECM-receptor interaction - Homo sapiens (human); hsa05145 Toxoplasmosis - Homo sapiens (human); hsa05146 Amoebiasis - Homo sapiens (human); hsa05165 Human papillomavirus infection - Homo sapiens (human); hsa05200 Pathways in cancer - Homo sapiens (human); hsa05222 Small cell lung c…	IPR013015; IPR002049; IPR000742; IPR008211;	Laminin IV type B; Laminin EGF domain; EGF-like domain; Laminin, N-terminal;
Q7Z6K3	Protein prenyltransferase alpha subunit repeat-containing protein 1 OS=Homo sapiens OX=9606 GN=PTAR1 PE=1 SV=2	3.745	Up	3.6943e-05	PTAR1	46.405	5	cytoskeleton	GO:0018342 protein prenylation; GO:0008152 metabolic process; GO:0044260 cellular macromolecule metabolic process; GO:0044267 cellular protein metabolic process; GO:0006464 cellular protein modification process; GO:0043170 macromolecule metabolic process; GO:0019538 protein metabolic process; GO:0036211 protein modification process; GO:0043412 macromolecule modification; GO:0044238 primary metabo…		GO:0016765 transferase activity, transferring alkyl or aryl (other than methyl) groups; GO:0004659 prenyltransferase activity; GO:0003824 catalytic activity; GO:0016740 transferase activity; GO:0008318 protein prenyltransferase activity;	K14137	PTAR1; protein prenyltransferase alpha subunit repeat containing protein 1
P05455	Lupus La protein OS=Homo sapiens OX=9606 GN=SSB PE=1 SV=2	0.555	Down	7.9204e-05	SSB	46.836	36.5	nucleus	GO:0075522 IRES-dependent viral translational initiation; GO:1903608 protein localization to cytoplasmic stress granule; GO:0006518 peptide metabolic process; GO:0009058 biosynthetic process; GO:0044764 multi-organism cellular process; GO:0009451 RNA modification; GO:0044237 cellular metabolic process; GO:0008152 metabolic process; GO:0044033 multi-organism metabolic process; GO:0002181 cytoplasm…	GO:0043229 intracellular organelle; GO:0000784 nuclear chromosome, telomeric region; GO:0000781 chromosome, telomeric region; GO:0043232 intracellular non-membrane-bounded organelle; GO:0044446 intracellular organelle part; GO:0032991 macromolecular complex; GO:0031981 nuclear lumen; GO:0044424 intracellular part; GO:0005623 cell; GO:0044422 organelle part; GO:0044427 chromosomal part; GO:0043228…	GO:0097159 organic cyclic compound binding; GO:1901363 heterocyclic compound binding; GO:0003729 mRNA binding; GO:0003723 RNA binding; GO:1901265 nucleoside phosphate binding; GO:0000049 tRNA binding; GO:0005488 binding; GO:0003676 nucleic acid binding; GO:0005515 protein binding; GO:0000166 nucleotide binding; GO:0036094 small molecule binding;	K11090	LA, SSB; lupus La protein	hsa05322 Systemic lupus erythematosus - Homo sapiens (human);	IPR011991; IPR006630; IPR000504; IPR012677; IPR014886;	Winged helix-turn-helix DNA-binding domain; RNA-binding protein Lupus La; RNA recognition motif domain; Nucleotide-binding alpha-beta plait domain; La protein, RNA-binding domain;
O96005	Cleft lip and palate transmembrane protein 1 OS=Homo sapiens OX=9606 GN=CLPTM1 PE=1 SV=1	1.607	Up	0.0146395	CLPTM1	76.096	9.7	plasma membrane	GO:0050794 regulation of cellular process; GO:0050863 regulation of T cell activation; GO:0044707 single-multicellular organism process; GO:0002694 regulation of leukocyte activation; GO:0045580 regulation of T cell differentiation; GO:0048869 cellular developmental process; GO:0033081 regulation of T cell differentiation in thymus; GO:0044699 single-organism process; GO:0051249 regulation of lym…	GO:0016020 membrane; GO:0031226 intrinsic component of plasma membrane; GO:0009897 external side of plasma membrane; GO:0044459 plasma membrane part; GO:0044425 membrane part; GO:0044464 cell part; GO:0071944 cell periphery; GO:0031224 intrinsic component of membrane; GO:0009986 cell surface; GO:0005887 integral component of plasma membrane; GO:0005623 cell; GO:0016021 integral component of membr…	GO:0005515 protein binding; GO:0005488 binding;
Q9NXV6	CDKN2A-interacting protein OS=Homo sapiens OX=9606 GN=CDKN2AIP PE=1 SV=3	2.088	Up	0.00184006	CDKN2AIP	61.124	4	nucleus	GO:0050794 regulation of cellular process; GO:0033554 cellular response to stress; GO:0051716 cellular response to stimulus; GO:0045926 negative regulation of growth; GO:0065008 regulation of biological quality; GO:0040008 regulation of growth; GO:0006950 response to stress; GO:0030307 positive regulation of cell growth; GO:0023051 regulation of signaling; GO:0048522 positive regulation of cellul…	GO:0043229 intracellular organelle; GO:0043232 intracellular non-membrane-bounded organelle; GO:0044446 intracellular organelle part; GO:0031981 nuclear lumen; GO:0044452 nucleolar part; GO:0044424 intracellular part; GO:0005730 nucleolus; GO:0005623 cell; GO:0044422 organelle part; GO:0043228 non-membrane-bounded organelle; GO:0043226 organelle; GO:0043231 intracellular membrane-bounded organell…	GO:0097159 organic cyclic compound binding; GO:1901363 heterocyclic compound binding; GO:0003723 RNA binding; GO:0005515 protein binding; GO:0002039 p53 binding; GO:0005488 binding; GO:0003676 nucleic acid binding;				IPR021859; IPR014720;	XRN-Two Binding Domain, XTBD; Double-stranded RNA-binding domain;
Q14145	Kelch-like ECH-associated protein 1 OS=Homo sapiens OX=9606 GN=KEAP1 PE=1 SV=2	5.024	Up	2.0448e-05	KEAP1	69.666	3.5	cytoplasm,nucleus	GO:0065008 regulation of biological quality; GO:0032270 positive regulation of cellular protein metabolic process; GO:0097659 nucleic acid-templated transcription; GO:0043009 chordate embryonic development; GO:0032436 positive regulation of proteasomal ubiquitin-dependent protein catabolic process; GO:1903533 regulation of protein targeting; GO:0090317 negative regulation of intracellular protein…	GO:0005783 endoplasmic reticulum; GO:0005737 cytoplasm; GO:0032991 macromolecular complex; GO:0099512 supramolecular fiber; GO:0044424 intracellular part; GO:0099080 supramolecular complex; GO:0005623 cell; GO:0044422 organelle part; GO:0043228 non-membrane-bounded organelle; GO:0005856 cytoskeleton; GO:0031974 membrane-enclosed lumen; GO:0005815 microtubule organizing center; GO:0005654 nucleopl…	GO:0005515 protein binding; GO:0008134 transcription factor binding; GO:0005488 binding;	K10456	KLHL19, KEAP1, INRF2; kelch-like protein 19	hsa04120 Ubiquitin mediated proteolysis - Homo sapiens (human); hsa05200 Pathways in cancer - Homo sapiens (human); hsa05225 Hepatocellular carcinoma - Homo sapiens (human); hsa05418 Fluid shear stress and atherosclerosis - Homo sapiens (human);	IPR015916; IPR011333; IPR011705; IPR000210;	Galactose oxidase, beta-propeller; SKP1/BTB/POZ domain; BTB/Kelch-associated; BTB/POZ domain;
Q9P0I2	ER membrane protein complex subunit 3 OS=Homo sapiens OX=9606 GN=EMC3 PE=1 SV=3	2.256	Up	0.00074033	EMC3	29.952	14.9	endoplasmic reticulum	GO:0006457 protein folding; GO:0034975 protein folding in endoplasmic reticulum; GO:0009987 cellular process;	GO:0043229 intracellular organelle; GO:0016020 membrane; GO:0005783 endoplasmic reticulum; GO:0042175 nuclear outer membrane-endoplasmic reticulum membrane network; GO:0098796 membrane protein complex; GO:0005737 cytoplasm; GO:0044446 intracellular organelle part; GO:0012505 endomembrane system; GO:0032991 macromolecular complex; GO:0031224 intrinsic component of membrane; GO:0044424 intracellula…
Q9H1K1	Iron-sulfur cluster assembly enzyme ISCU, mitochondrial OS=Homo sapiens OX=9606 GN=ISCU PE=1 SV=2	1.741	Up	0.00016144	ISCU	17.999	10.8	mitochondria	GO:0044085 cellular component biogenesis; GO:0051188 cofactor biosynthetic process; GO:0006879 cellular iron ion homeostasis; GO:0016043 cellular component organization; GO:0065008 regulation of biological quality; GO:0055076 transition metal ion homeostasis; GO:0030003 cellular cation homeostasis; GO:0055072 iron ion homeostasis; GO:0044699 single-organism process; GO:0009058 biosynthetic proces…	GO:0005759 mitochondrial matrix; GO:0043229 intracellular organelle; GO:0044429 mitochondrial part; GO:0005737 cytoplasm; GO:0044446 intracellular organelle part; GO:0044424 intracellular part; GO:0005829 cytosol; GO:0005623 cell; GO:0005739 mitochondrion; GO:0044422 organelle part; GO:0031974 membrane-enclosed lumen; GO:0043226 organelle; GO:0043231 intracellular membrane-bounded organelle; GO:0…	GO:0051537 2 iron, 2 sulfur cluster binding; GO:0005506 iron ion binding; GO:0043167 ion binding; GO:0005515 protein binding; GO:0051539 4 iron, 4 sulfur cluster binding; GO:0032947 protein complex scaffold; GO:0046914 transition metal ion binding; GO:0003824 catalytic activity; GO:0051536 iron-sulfur cluster binding; GO:0005488 binding; GO:0043169 cation binding; GO:0046872 metal ion binding; GO…	K22068	ISCU; iron-sulfur cluster assembly enzyme ISCU, mitochondrial		IPR002871;	NIF system FeS cluster assembly, NifU, N-terminal;
P31749	RAC-alpha serine/threonine-protein kinase OS=Homo sapiens OX=9606 GN=AKT1 PE=1 SV=2	0.549	Down	0.0005567	AKT1	55.686	23.3	cytoplasm	GO:0044700 single organism signaling; GO:0002694 regulation of leukocyte activation; GO:0032872 regulation of stress-activated MAPK cascade; GO:0048732 gland development; GO:0022414 reproductive process; GO:0010608 posttranscriptional regulation of gene expression; GO:0032436 positive regulation of proteasomal ubiquitin-dependent protein catabolic process; GO:0042593 glucose homeostasis; GO:00902…	GO:0016020 membrane; GO:0030054 cell junction; GO:0071944 cell periphery; GO:0031982 vesicle; GO:0005737 cytoplasm; GO:0032991 macromolecular complex; GO:0044424 intracellular part; GO:0005911 cell-cell junction; GO:0005623 cell; GO:0044422 organelle part; GO:0043228 non-membrane-bounded organelle; GO:0005856 cytoskeleton; GO:0031974 membrane-enclosed lumen; GO:0005815 microtubule organizing cent…	GO:0030235 nitric-oxide synthase regulator activity; GO:1901265 nucleoside phosphate binding; GO:0019903 protein phosphatase binding; GO:0016773 phosphotransferase activity, alcohol group as acceptor; GO:0019901 protein kinase binding; GO:0005515 protein binding; GO:0004672 protein kinase activity; GO:0098772 molecular function regulator; GO:0051721 protein phosphatase 2A binding; GO:0032794 GTPa…	K04456	AKT; RAC serine/threonine-protein kinase [EC:2.7.11.1]	hsa01521 EGFR tyrosine kinase inhibitor resistance - Homo sapiens (human); hsa01522 Endocrine resistance - Homo sapiens (human); hsa01524 Platinum drug resistance - Homo sapiens (human); hsa04010 MAPK signaling pathway - Homo sapiens (human); hsa04012 ErbB signaling pathway - Homo sapiens (human); hsa04014 Ras signaling pathway - Homo sapiens (human); hsa04015 Rap1 signaling pathway - Homo sapien…	IPR000719; IPR011993; IPR000961; IPR011009; IPR017892; IPR001849;	Protein kinase domain; PH domain-like; AGC-kinase, C-terminal; Protein kinase-like domain; Protein kinase, C-terminal; Pleckstrin homology domain;
Q9UMX0	Ubiquilin-1 OS=Homo sapiens OX=9606 GN=UBQLN1 PE=1 SV=2	6.257	Up	6.6162e-07	UBQLN1	62.518	16	nucleus	GO:0044085 cellular component biogenesis; GO:1905037 autophagosome organization; GO:0010941 regulation of cell death; GO:0032270 positive regulation of cellular protein metabolic process; GO:0032436 positive regulation of proteasomal ubiquitin-dependent protein catabolic process; GO:0036503 ERAD pathway; GO:1903170 negative regulation of calcium ion transmembrane transport; GO:0031347 regulation …	GO:0016020 membrane; GO:0005783 endoplasmic reticulum; GO:0031410 cytoplasmic vesicle; GO:0071944 cell periphery; GO:0031982 vesicle; GO:0005737 cytoplasm; GO:0032991 macromolecular complex; GO:0044424 intracellular part; GO:0005623 cell; GO:0044422 organelle part; GO:0005776 autophagosome; GO:1905369 endopeptidase complex; GO:0031974 membrane-enclosed lumen; GO:0005654 nucleoplasm; GO:1902494 ca…	GO:0031593 polyubiquitin binding; GO:0042802 identical protein binding; GO:0005488 binding; GO:0043130 ubiquitin binding; GO:0005515 protein binding; GO:0019900 kinase binding; GO:0032182 ubiquitin-like protein binding; GO:0019899 enzyme binding;	K04523	UBQLN, DSK2; ubiquilin	hsa04141 Protein processing in endoplasmic reticulum - Homo sapiens (human);	IPR006636; IPR015940; IPR029071; IPR000626; IPR009060;	Heat shock chaperonin-binding; Ubiquitin-associated domain; Ubiquitin-related domain; Ubiquitin domain; UBA-like;
Q9Y3U8	60S ribosomal protein L36 OS=Homo sapiens OX=9606 GN=RPL36 PE=1 SV=3	0.57	Down	0.0023028	RPL36	12.254	37.1	nucleus	GO:0044085 cellular component biogenesis; GO:0022613 ribonucleoprotein complex biogenesis; GO:0072594 establishment of protein localization to organelle; GO:0006518 peptide metabolic process; GO:0009058 biosynthetic process; GO:0044764 multi-organism cellular process; GO:0044237 cellular metabolic process; GO:0015031 protein transport; GO:0051234 establishment of localization; GO:0006605 protein …	GO:0016020 membrane; GO:0005737 cytoplasm; GO:0032991 macromolecular complex; GO:0044424 intracellular part; GO:0005623 cell; GO:0044422 organelle part; GO:0043228 non-membrane-bounded organelle; GO:0031974 membrane-enclosed lumen; GO:0070013 intracellular organelle lumen; GO:0044391 ribosomal subunit; GO:0005622 intracellular; GO:0044464 cell part; GO:0044445 cytosolic part; GO:0043227 membrane-…	GO:0097159 organic cyclic compound binding; GO:1901363 heterocyclic compound binding; GO:0003723 RNA binding; GO:0005488 binding; GO:0003676 nucleic acid binding; GO:0005198 structural molecule activity; GO:0003735 structural constituent of ribosome;	K02920	RP-L36e, RPL36; large subunit ribosomal protein L36e	hsa03010 Ribosome - Homo sapiens (human);
Q9H3Z4	DnaJ homolog subfamily C member 5 OS=Homo sapiens OX=9606 GN=DNAJC5 PE=1 SV=1	3.211	Up	0.000143954	DNAJC5	22.149	8.6	cytoplasm	GO:0044700 single organism signaling; GO:0001505 regulation of neurotransmitter levels; GO:0010941 regulation of cell death; GO:0065008 regulation of biological quality; GO:0045321 leukocyte activation; GO:0043523 regulation of neuron apoptotic process; GO:0007269 neurotransmitter secretion; GO:0044699 single-organism process; GO:0099504 synaptic vesicle cycle; GO:0051234 establishment of localiz…	GO:0016020 membrane; GO:0044421 extracellular region part; GO:0031090 organelle membrane; GO:0005737 cytoplasm; GO:0044433 cytoplasmic vesicle part; GO:0005623 cell; GO:0044422 organelle part; GO:0070382 exocytic vesicle; GO:0070062 extracellular exosome; GO:0005765 lysosomal membrane; GO:0030136 clathrin-coated vesicle; GO:0008021 synaptic vesicle; GO:0005622 intracellular; GO:0005764 lysosome; …	GO:0097367 carbohydrate derivative binding; GO:0005515 protein binding; GO:0001948 glycoprotein binding; GO:0043008 ATP-dependent protein binding; GO:0005488 binding;	K09525	DNAJC5; DnaJ homolog subfamily C member 5	hsa04141 Protein processing in endoplasmic reticulum - Homo sapiens (human);	IPR001623;	DnaJ domain;
P21589	5'-nucleotidase OS=Homo sapiens OX=9606 GN=NT5E PE=1 SV=1	1.618	Up	0.00099878	NT5E	63.367	31.9	peroxisome	GO:0042278 purine nucleoside metabolic process; GO:0046135 pyrimidine nucleoside catabolic process; GO:0009116 nucleoside metabolic process; GO:0019362 pyridine nucleotide metabolic process; GO:0009167 purine ribonucleoside monophosphate metabolic process; GO:0009117 nucleotide metabolic process; GO:0006196 AMP catabolic process; GO:0044699 single-organism process; GO:0009163 nucleoside biosynthe…	GO:0016020 membrane; GO:0044421 extracellular region part; GO:0071944 cell periphery; GO:0031982 vesicle; GO:0005737 cytoplasm; GO:0031225 anchored component of membrane; GO:0031224 intrinsic component of membrane; GO:0044424 intracellular part; GO:0005623 cell; GO:0005829 cytosol; GO:0005576 extracellular region; GO:0005886 plasma membrane; GO:0043226 organelle; GO:0070062 extracellular exosome;…	GO:1901265 nucleoside phosphate binding; GO:0016791 phosphatase activity; GO:0008252 nucleotidase activity; GO:0043167 ion binding; GO:0016787 hydrolase activity; GO:0000166 nucleotide binding; GO:1901363 heterocyclic compound binding; GO:0097159 organic cyclic compound binding; GO:0008253 5'-nucleotidase activity; GO:0003824 catalytic activity; GO:0042578 phosphoric ester hydrolase activity; GO:…	K19970	NT5E, CD73; 5'-nucleotidase [EC:3.1.3.5]	hsa00230 Purine metabolism - Homo sapiens (human); hsa00240 Pyrimidine metabolism - Homo sapiens (human); hsa00760 Nicotinate and nicotinamide metabolism - Homo sapiens (human); hsa01100 Metabolic pathways - Homo sapiens (human);	IPR029052; IPR004843; IPR008334;	Metallo-dependent phosphatase-like; Calcineurin-like phosphoesterase domain, ApaH type; 5'-Nucleotidase, C-terminal;
Q8ND24	RING finger protein 214 OS=Homo sapiens OX=9606 GN=RNF214 PE=1 SV=2	1.671	Up	0.00143997	RNF214	77.667	3.1	cytoplasm			GO:0046914 transition metal ion binding; GO:0005488 binding; GO:0043167 ion binding; GO:0043169 cation binding; GO:0046872 metal ion binding; GO:0005515 protein binding; GO:0008270 zinc ion binding;				IPR001841; IPR013083;	Zinc finger, RING-type; Zinc finger, RING/FYVE/PHD-type;
P27707	Deoxycytidine kinase OS=Homo sapiens OX=9606 GN=DCK PE=1 SV=1	2.066	Up	4.2275e-06	DCK	30.518	29.2	nucleus	GO:0016310 phosphorylation; GO:0009116 nucleoside metabolic process; GO:0009165 nucleotide biosynthetic process; GO:0006725 cellular aromatic compound metabolic process; GO:0009117 nucleotide metabolic process; GO:0009157 deoxyribonucleoside monophosphate biosynthetic process; GO:0044699 single-organism process; GO:0009163 nucleoside biosynthetic process; GO:0009058 biosynthetic process; GO:19015…	GO:0043226 organelle; GO:0043231 intracellular membrane-bounded organelle; GO:0043229 intracellular organelle; GO:0005634 nucleus; GO:0044464 cell part; GO:0005622 intracellular; GO:0005737 cytoplasm; GO:0044424 intracellular part; GO:0043227 membrane-bounded organelle; GO:0005829 cytosol; GO:0005623 cell; GO:0044444 cytoplasmic part;	GO:1901265 nucleoside phosphate binding; GO:0004137 deoxycytidine kinase activity; GO:0046983 protein dimerization activity; GO:0019205 nucleobase-containing compound kinase activity; GO:0005515 protein binding; GO:0019136 deoxynucleoside kinase activity; GO:0097159 organic cyclic compound binding; GO:1901363 heterocyclic compound binding; GO:0042802 identical protein binding; GO:0016301 kinase a…	K00893	DCK; deoxycitidine kinase [EC:2.7.1.74]	hsa00230 Purine metabolism - Homo sapiens (human); hsa00240 Pyrimidine metabolism - Homo sapiens (human); hsa01100 Metabolic pathways - Homo sapiens (human);	IPR027417; IPR031314;	P-loop containing nucleoside triphosphate hydrolase; Deoxynucleoside kinase domain;
Q92626	Peroxidasin homolog OS=Homo sapiens OX=9606 GN=PXDN PE=1 SV=2	7.803	Up	4.6772e-07	PXDN	165.27	25.2	extracellular	GO:0050794 regulation of cellular process; GO:0016043 cellular component organization; GO:0009968 negative regulation of signal transduction; GO:0023051 regulation of signaling; GO:0001959 regulation of cytokine-mediated signaling pathway; GO:0044699 single-organism process; GO:0048519 negative regulation of biological process; GO:0048523 negative regulation of cellular process; GO:0050896 respon…	GO:0043229 intracellular organelle; GO:0005615 extracellular space; GO:0044421 extracellular region part; GO:0005783 endoplasmic reticulum; GO:0031982 vesicle; GO:0005737 cytoplasm; GO:0012505 endomembrane system; GO:0044424 intracellular part; GO:0005623 cell; GO:0005576 extracellular region; GO:0070062 extracellular exosome; GO:0043231 intracellular membrane-bounded organelle; GO:0043226 organe…	GO:0005102 receptor binding; GO:0019838 growth factor binding; GO:0019966 interleukin-1 binding; GO:0043167 ion binding; GO:0005126 cytokine receptor binding; GO:0016209 antioxidant activity; GO:0005515 protein binding; GO:0098772 molecular function regulator; GO:0016491 oxidoreductase activity; GO:0097159 organic cyclic compound binding; GO:1901363 heterocyclic compound binding; GO:0005152 inter…	K19511	PXDN, VPO1; peroxidase [EC:1.11.1.7]		IPR003598; IPR007110; IPR000483; IPR013783; IPR001007; IPR003599; IPR032675; IPR013098;	Immunoglobulin subtype 2; Immunoglobulin-like domain; Cysteine-rich flanking region, C-terminal; Immunoglobulin-like fold; VWFC domain; Immunoglobulin subtype; Leucine-rich repeat domain, L domain-like; Immunoglobulin I-set;
Q9HA92	Radical S-adenosyl methionine domain-containing protein 1, mitochondrial OS=Homo sapiens OX=9606 GN=RSAD1 PE=1 SV=2	0.546	Down	0.037078	RSAD1	48.713	1.6	mitochondria	GO:0051188 cofactor biosynthetic process; GO:0018130 heterocycle biosynthetic process; GO:0006725 cellular aromatic compound metabolic process; GO:0055114 oxidation-reduction process; GO:0006779 porphyrin-containing compound biosynthetic process; GO:1901360 organic cyclic compound metabolic process; GO:0044699 single-organism process; GO:0006807 nitrogen compound metabolic process; GO:0009058 bio…	GO:0043226 organelle; GO:0043231 intracellular membrane-bounded organelle; GO:0043229 intracellular organelle; GO:0044464 cell part; GO:0005622 intracellular; GO:0005737 cytoplasm; GO:0044424 intracellular part; GO:0043227 membrane-bounded organelle; GO:0005623 cell; GO:0005739 mitochondrion; GO:0044444 cytoplasmic part;	GO:0016627 oxidoreductase activity, acting on the CH-CH group of donors; GO:0016634 oxidoreductase activity, acting on the CH-CH group of donors, oxygen as acceptor; GO:0003824 catalytic activity; GO:0051536 iron-sulfur cluster binding; GO:0005488 binding; GO:0043167 ion binding; GO:0043169 cation binding; GO:0046872 metal ion binding; GO:0004109 coproporphyrinogen oxidase activity; GO:0051539 4 …				IPR006638; IPR023404; IPR007197; IPR010723;	Elongator protein 3/MiaB/NifB; Radical SAM, alpha/beta horseshoe; Radical SAM; HemN, C-terminal;
Q96PV6	Leukocyte receptor cluster member 8 OS=Homo sapiens OX=9606 GN=LENG8 PE=1 SV=3	4.544	Up	0.0012041	LENG8	88.156	1.8	nucleus			GO:0005515 protein binding; GO:0005488 binding;
P36871	Phosphoglucomutase-1 OS=Homo sapiens OX=9606 GN=PGM1 PE=1 SV=3	1.528	Up	5.7495e-05	PGM1	61.448	44.1	cytoplasm	GO:0009116 nucleoside metabolic process; GO:0045321 leukocyte activation; GO:0006165 nucleoside diphosphate phosphorylation; GO:0019362 pyridine nucleotide metabolic process; GO:0006096 glycolytic process; GO:0009185 ribonucleoside diphosphate metabolic process; GO:0044237 cellular metabolic process; GO:0044264 cellular polysaccharide metabolic process; GO:0006006 glucose metabolic process; GO:00…	GO:1904724 tertiary granule lumen; GO:0044421 extracellular region part; GO:0031410 cytoplasmic vesicle; GO:0005737 cytoplasm; GO:0031982 vesicle; GO:0044433 cytoplasmic vesicle part; GO:0044424 intracellular part; GO:0005623 cell; GO:1904813 ficolin-1-rich granule lumen; GO:0044422 organelle part; GO:0043228 non-membrane-bounded organelle; GO:0070062 extracellular exosome; GO:0005856 cytoskeleto…	GO:0000287 magnesium ion binding; GO:0016853 isomerase activity; GO:0003824 catalytic activity; GO:0004614 phosphoglucomutase activity; GO:0005488 binding; GO:0016868 intramolecular transferase activity, phosphotransferases; GO:0043167 ion binding; GO:0046872 metal ion binding; GO:0043169 cation binding; GO:0005515 protein binding; GO:0016866 intramolecular transferase activity;	K01835	pgm; phosphoglucomutase [EC:5.4.2.2]	hsa00010 Glycolysis / Gluconeogenesis - Homo sapiens (human); hsa00030 Pentose phosphate pathway - Homo sapiens (human); hsa00052 Galactose metabolism - Homo sapiens (human); hsa00230 Purine metabolism - Homo sapiens (human); hsa00500 Starch and sucrose metabolism - Homo sapiens (human); hsa00520 Amino sugar and nucleotide sugar metabolism - Homo sapiens (human); hsa01100 Metabolic pathways - Hom…	IPR005846; IPR005843; IPR005845; IPR016055; IPR005844;	Alpha-D-phosphohexomutase, alpha/beta/alpha domain III; Alpha-D-phosphohexomutase, C-terminal; Alpha-D-phosphohexomutase, alpha/beta/alpha domain II; Alpha-D-phosphohexomutase, alpha/beta/alpha I/II/III; Alpha-D-phosphohexomutase, alpha/beta/alpha domain I;
O15379	Histone deacetylase 3 OS=Homo sapiens OX=9606 GN=HDAC3 PE=1 SV=2	3.207	Up	2.3963e-05	HDAC3	48.847	2.3	cytoplasm	GO:0044085 cellular component biogenesis; GO:0065008 regulation of biological quality; GO:0032872 regulation of stress-activated MAPK cascade; GO:0010941 regulation of cell death; GO:0032270 positive regulation of cellular protein metabolic process; GO:0097659 nucleic acid-templated transcription; GO:1903533 regulation of protein targeting; GO:0009891 positive regulation of biosynthetic process; …	GO:0016020 membrane; GO:0005874 microtubule; GO:0071944 cell periphery; GO:0005737 cytoplasm; GO:0032991 macromolecular complex; GO:0099512 supramolecular fiber; GO:0044424 intracellular part; GO:0017053 transcriptional repressor complex; GO:0099080 supramolecular complex; GO:0005623 cell; GO:0044422 organelle part; GO:0000118 histone deacetylase complex; GO:0043228 non-membrane-bounded organelle…	GO:0003714 transcription corepressor activity; GO:0032041 NAD-dependent histone deacetylase activity (H3-K14 specific); GO:0017136 NAD-dependent histone deacetylase activity; GO:0005515 protein binding; GO:0016787 hydrolase activity; GO:0003682 chromatin binding; GO:0003712 transcription cofactor activity; GO:0030332 cyclin binding; GO:0004407 histone deacetylase activity; GO:0031078 histone deac…	K11404	HDAC3; histone deacetylase 3 [EC:3.5.1.98]	hsa04919 Thyroid hormone signaling pathway - Homo sapiens (human); hsa05034 Alcoholism - Homo sapiens (human); hsa05203 Viral carcinogenesis - Homo sapiens (human);	IPR023801;	Histone deacetylase domain;
Q12923	Tyrosine-protein phosphatase non-receptor type 13 OS=Homo sapiens OX=9606 GN=PTPN13 PE=1 SV=2	1.972	Up	0.0033397	PTPN13	276.9	1	nucleus	GO:0050794 regulation of cellular process; GO:0046486 glycerolipid metabolic process; GO:0006661 phosphatidylinositol biosynthetic process; GO:0023051 regulation of signaling; GO:0008654 phospholipid biosynthetic process; GO:0044267 cellular protein metabolic process; GO:0044699 single-organism process; GO:0044255 cellular lipid metabolic process; GO:0009058 biosynthetic process; GO:0044237 cellu…	GO:0031252 cell leading edge; GO:0043229 intracellular organelle; GO:0016020 membrane; GO:0044421 extracellular region part; GO:0042995 cell projection; GO:0043232 intracellular non-membrane-bounded organelle; GO:0071944 cell periphery; GO:0031982 vesicle; GO:0005737 cytoplasm; GO:0044424 intracellular part; GO:0005623 cell; GO:0005576 extracellular region; GO:0005886 plasma membrane; GO:0043228 …	GO:0043548 phosphatidylinositol 3-kinase binding; GO:0036312 phosphatidylinositol 3-kinase regulatory subunit binding; GO:0004725 protein tyrosine phosphatase activity; GO:0003824 catalytic activity; GO:0042578 phosphoric ester hydrolase activity; GO:0016791 phosphatase activity; GO:0005488 binding; GO:0016788 hydrolase activity, acting on ester bonds; GO:0005515 protein binding; GO:0016787 hydro…	K02374	PTPN13, FAP-1; tyrosine-protein phosphatase non-receptor type 13	hsa04210 Apoptosis - Homo sapiens (human);	IPR019748; IPR000387; IPR018980; IPR003595; IPR001478; IPR011019; IPR029021; IPR018979; IPR019749; IPR000242; IPR029071; IPR011993; IPR014352; IPR000299;	FERM central domain; Tyrosine specific protein phosphatases domain; FERM, C-terminal PH-like domain; Protein-tyrosine phosphatase, catalytic; PDZ domain; KIND domain; Protein-tyrosine phosphatase-like; FERM, N-terminal; Band 4.1 domain; PTP type protein phosphatase; Ubiquitin-related domain; PH domain-like; FERM/acyl-CoA-binding protein, 3-helical bundle; FERM domain;
P85037	Forkhead box protein K1 OS=Homo sapiens OX=9606 GN=FOXK1 PE=1 SV=1	3.147	Up	5.6655e-05	FOXK1	75.456	6.1	nucleus	GO:0070646 protein modification by small protein removal; GO:0097659 nucleic acid-templated transcription; GO:0048869 cellular developmental process; GO:0009891 positive regulation of biosynthetic process; GO:0044699 single-organism process; GO:0009058 biosynthetic process; GO:0044237 cellular metabolic process; GO:0051253 negative regulation of RNA metabolic process; GO:2001141 regulation of RNA…	GO:0043229 intracellular organelle; GO:0044446 intracellular organelle part; GO:0031981 nuclear lumen; GO:0044424 intracellular part; GO:0005623 cell; GO:0044422 organelle part; GO:0043226 organelle; GO:0043231 intracellular membrane-bounded organelle; GO:0031974 membrane-enclosed lumen; GO:0005654 nucleoplasm; GO:0005634 nucleus; GO:0070013 intracellular organelle lumen; GO:0044464 cell part; GO…	GO:0000981 RNA polymerase II transcription factor activity, sequence-specific DNA binding; GO:0003677 DNA binding; GO:0000976 transcription regulatory region sequence-specific DNA binding; GO:0003690 double-stranded DNA binding; GO:1990837 sequence-specific double-stranded DNA binding; GO:0001012 RNA polymerase II regulatory region DNA binding; GO:0005515 protein binding; GO:0043565 sequence-spec…	K09404	FOXK; forkhead box protein K		IPR011991; IPR008984; IPR001766; IPR000253;	Winged helix-turn-helix DNA-binding domain; SMAD/FHA domain; Fork head domain; Forkhead-associated (FHA) domain;
Q5T013	Putative hydroxypyruvate isomerase OS=Homo sapiens OX=9606 GN=HYI PE=1 SV=2	3.294	Up	0.00026107	HYI	30.405	15.9	mitochondria			GO:0016853 isomerase activity; GO:0003824 catalytic activity; GO:0005488 binding; GO:0005515 protein binding; GO:0016860 intramolecular oxidoreductase activity; GO:0016861 intramolecular oxidoreductase activity, interconverting aldoses and ketoses; GO:0008903 hydroxypyruvate isomerase activity;	K01816	hyi, gip; hydroxypyruvate isomerase [EC:5.3.1.22]	hsa00630 Glyoxylate and dicarboxylate metabolism - Homo sapiens (human); hsa01100 Metabolic pathways - Homo sapiens (human);	IPR013022;	Xylose isomerase-like, TIM barrel domain;
O43824	Putative GTP-binding protein 6 OS=Homo sapiens OX=9606 GN=GTPBP6 PE=2 SV=4	21.207	Up	1.8513e-06	GTPBP6	56.897	5	mitochondria		GO:0044424 intracellular part; GO:0005623 cell; GO:0044464 cell part; GO:0005622 intracellular; GO:0005737 cytoplasm;	GO:1901265 nucleoside phosphate binding; GO:0001882 nucleoside binding; GO:0043167 ion binding; GO:0044877 macromolecular complex binding; GO:0000166 nucleotide binding; GO:0043022 ribosome binding; GO:1901363 heterocyclic compound binding; GO:0097159 organic cyclic compound binding; GO:0032549 ribonucleoside binding; GO:0097367 carbohydrate derivative binding; GO:0032553 ribonucleotide binding; …				IPR030394; IPR006073; IPR025121; IPR027417; IPR032305;	HflX-type guanine nucleotide-binding (G) domain; GTP binding domain; GTPase HflX, N-terminal; P-loop containing nucleoside triphosphate hydrolase; GTP-binding protein, middle domain;
P62256	Ubiquitin-conjugating enzyme E2 H OS=Homo sapiens OX=9606 GN=UBE2H PE=1 SV=1	1.545	Up	0.00037992	UBE2H	20.655	31.1	cytoplasm	GO:0051603 proteolysis involved in cellular protein catabolic process; GO:0044257 cellular protein catabolic process; GO:0044267 cellular protein metabolic process; GO:0044237 cellular metabolic process; GO:0010498 proteasomal protein catabolic process; GO:0000209 protein polyubiquitination; GO:0071704 organic substance metabolic process; GO:0008152 metabolic process; GO:0070979 protein K11-linke…	GO:0044464 cell part; GO:0005622 intracellular; GO:0005737 cytoplasm; GO:0044424 intracellular part; GO:0005623 cell; GO:0005829 cytosol; GO:0044444 cytoplasmic part;	GO:1901265 nucleoside phosphate binding; GO:0031625 ubiquitin protein ligase binding; GO:0005515 protein binding; GO:0097159 organic cyclic compound binding; GO:1901363 heterocyclic compound binding; GO:0061630 ubiquitin protein ligase activity; GO:0032553 ribonucleotide binding; GO:0003824 catalytic activity; GO:0005488 binding; GO:0032550 purine ribonucleoside binding; GO:0043168 anion binding;…	K10576	UBE2H, UBC8; ubiquitin-conjugating enzyme E2 H [EC:2.3.2.23]	hsa04120 Ubiquitin mediated proteolysis - Homo sapiens (human);	IPR016135; IPR000608;	Ubiquitin-conjugating enzyme/RWD-like; Ubiquitin-conjugating enzyme E2;
P46934	E3 ubiquitin-protein ligase NEDD4 OS=Homo sapiens OX=9606 GN=NEDD4 PE=1 SV=4	1.593	Up	0.0026376	NEDD4	149.11	6.7	nucleus	GO:0044700 single organism signaling; GO:0006623 protein targeting to vacuole; GO:0044237 cellular metabolic process; GO:0042110 T cell activation; GO:0050847 progesterone receptor signaling pathway; GO:0008152 metabolic process; GO:0003151 outflow tract morphogenesis; GO:0030522 intracellular receptor signaling pathway; GO:0030518 intracellular steroid hormone receptor signaling pathway; GO:0051…	GO:0030425 dendrite; GO:0016020 membrane; GO:0044421 extracellular region part; GO:0005938 cell cortex; GO:0071944 cell periphery; GO:0031982 vesicle; GO:0005737 cytoplasm; GO:0099568 cytoplasmic region; GO:0032991 macromolecular complex; GO:0044424 intracellular part; GO:0005623 cell; GO:0044422 organelle part; GO:0043197 dendritic spine; GO:0044427 chromosomal part; GO:0043228 non-membrane-boun…	GO:0016597 amino acid binding; GO:0008200 ion channel inhibitor activity; GO:0050815 phosphoserine binding; GO:0005102 receptor binding; GO:0099106 ion channel regulator activity; GO:0031698 beta-2 adrenergic receptor binding; GO:0005515 protein binding; GO:0017080 sodium channel regulator activity; GO:0070063 RNA polymerase binding; GO:0098772 molecular function regulator; GO:0032182 ubiquitin-l…	K10591	NEDD4, RSP5; E3 ubiquitin-protein ligase NEDD4 [EC:2.3.2.26]	hsa04120 Ubiquitin mediated proteolysis - Homo sapiens (human); hsa04144 Endocytosis - Homo sapiens (human); hsa04530 Tight junction - Homo sapiens (human); hsa05169 Epstein-Barr virus infection - Homo sapiens (human);	IPR001202; IPR000569; IPR000008;	WW domain; HECT domain; C2 domain;
P78362	SRSF protein kinase 2 OS=Homo sapiens OX=9606 GN=SRPK2 PE=1 SV=3	0.497	Down	0.0095172	SRPK2	77.526	5.7	cytoplasm	GO:0044085 cellular component biogenesis; GO:0044700 single organism signaling; GO:0022613 ribonucleoprotein complex biogenesis; GO:0010941 regulation of cell death; GO:0022618 ribonucleoprotein complex assembly; GO:0043523 regulation of neuron apoptotic process; GO:0044237 cellular metabolic process; GO:0001525 angiogenesis; GO:0008152 metabolic process; GO:0065003 macromolecular complex assembl…	GO:0043229 intracellular organelle; GO:0043232 intracellular non-membrane-bounded organelle; GO:0044446 intracellular organelle part; GO:0005737 cytoplasm; GO:0031981 nuclear lumen; GO:0044424 intracellular part; GO:0005730 nucleolus; GO:0005829 cytosol; GO:0005623 cell; GO:0044422 organelle part; GO:0043228 non-membrane-bounded organelle; GO:0043226 organelle; GO:0043231 intracellular membrane-b…	GO:1901265 nucleoside phosphate binding; GO:0016773 phosphotransferase activity, alcohol group as acceptor; GO:0005515 protein binding; GO:0004672 protein kinase activity; GO:1901363 heterocyclic compound binding; GO:0097159 organic cyclic compound binding; GO:0016301 kinase activity; GO:0003824 catalytic activity; GO:0032553 ribonucleotide binding; GO:0005488 binding; GO:0032550 purine ribonucle…	K08831	SRPK2; serine/threonine-protein kinase SRPK2 [EC:2.7.11.1]		IPR000719; IPR011009;	Protein kinase domain; Protein kinase-like domain;
Q96MT4	Uncharacterized protein encoded by LINC01600 OS=Homo sapiens OX=9606 GN=LINC01600 PE=1 SV=2	22.507	Up	4.5582e-07	LINC01600	13.896	6.3	extracellular
Q8IYD1	Eukaryotic peptide chain release factor GTP-binding subunit ERF3B OS=Homo sapiens OX=9606 GN=GSPT2 PE=1 SV=2	2.073	Up	0.000199228	GSPT2	68.882	14	cytoplasm,nucleus	GO:0006518 peptide metabolic process; GO:0044699 single-organism process; GO:0009058 biosynthetic process; GO:0044237 cellular metabolic process; GO:0043241 protein complex disassembly; GO:0008152 metabolic process; GO:0002181 cytoplasmic translation; GO:0000184 nuclear-transcribed mRNA catabolic process, nonsense-mediated decay; GO:1901361 organic cyclic compound catabolic process; GO:0019538 pr…	GO:0018444 translation release factor complex; GO:0044464 cell part; GO:0005622 intracellular; GO:0005737 cytoplasm; GO:0032991 macromolecular complex; GO:0044424 intracellular part; GO:0005829 cytosol; GO:0043234 protein complex; GO:0005623 cell; GO:0044444 cytoplasmic part;	GO:1901265 nucleoside phosphate binding; GO:0016817 hydrolase activity, acting on acid anhydrides; GO:0005515 protein binding; GO:0016787 hydrolase activity; GO:1901363 heterocyclic compound binding; GO:0097159 organic cyclic compound binding; GO:0016462 pyrophosphatase activity; GO:0032553 ribonucleotide binding; GO:0003824 catalytic activity; GO:0005488 binding; GO:0032550 purine ribonucleoside…	K03267	ERF3, GSPT; peptide chain release factor subunit 3	hsa03015 mRNA surveillance pathway - Homo sapiens (human);	IPR004160; IPR004161; IPR009001; IPR027417; IPR000795; IPR009818; IPR009000;	Translation elongation factor EFTu/EF1A, C-terminal; Translation elongation factor EFTu-like, domain 2; Translation elongation factor EF1A/initiation factor IF2gamma, C-terminal; P-loop containing nucleoside triphosphate hydrolase; Transcription factor, GTP-binding domain; Ataxin-2, C-terminal; Translation protein, beta-barrel domain;
O43504	Ragulator complex protein LAMTOR5 OS=Homo sapiens OX=9606 GN=LAMTOR5 PE=1 SV=1	2.138	Up	0.0171226	LAMTOR5	9.6138	33	cytoskeleton	GO:0001101 response to acid chemical; GO:0065008 regulation of biological quality; GO:0019079 viral genome replication; GO:0010941 regulation of cell death; GO:0023051 regulation of signaling; GO:1902533 positive regulation of intracellular signal transduction; GO:0044699 single-organism process; GO:0044764 multi-organism cellular process; GO:0006914 autophagy; GO:0044237 cellular metabolic proce…	GO:0016020 membrane; GO:0031410 cytoplasmic vesicle; GO:0031090 organelle membrane; GO:0098796 membrane protein complex; GO:0098857 membrane microdomain; GO:0071986 Ragulator complex; GO:0005737 cytoplasm; GO:0031982 vesicle; GO:0044433 cytoplasmic vesicle part; GO:0032991 macromolecular complex; GO:0044424 intracellular part; GO:0005623 cell; GO:0044422 organelle part; GO:0005765 lysosomal membr…	GO:0005515 protein binding; GO:0005488 binding;	K16344	LAMTOR5, HBXIP; ragulator complex protein LAMTOR5	hsa04150 mTOR signaling pathway - Homo sapiens (human);
Q96LD1	Zeta-sarcoglycan OS=Homo sapiens OX=9606 GN=SGCZ PE=2 SV=1	0.286	Down	0.00130271	SGCZ	32.948	2.7	plasma membrane	GO:0014706 striated muscle tissue development; GO:0072359 circulatory system development; GO:0055001 muscle cell development; GO:0016043 cellular component organization; GO:0044707 single-multicellular organism process; GO:0065008 regulation of biological quality; GO:0048738 cardiac muscle tissue development; GO:0048869 cellular developmental process; GO:0044699 single-organism process; GO:006024…	GO:0090665 glycoprotein complex; GO:0043229 intracellular organelle; GO:0016020 membrane; GO:0043232 intracellular non-membrane-bounded organelle; GO:0098796 membrane protein complex; GO:0071944 cell periphery; GO:0098797 plasma membrane protein complex; GO:0005737 cytoplasm; GO:0032991 macromolecular complex; GO:0031224 intrinsic component of membrane; GO:0044424 intracellular part; GO:0005623 c…
O60229	Kalirin OS=Homo sapiens OX=9606 GN=KALRN PE=1 SV=2	2.433	Up	0.011678	KALRN	340.17	0.6	cytoplasm	GO:0044700 single organism signaling; GO:1900271 regulation of long-term synaptic potentiation; GO:0065008 regulation of biological quality; GO:0010941 regulation of cell death; GO:0048732 gland development; GO:0022414 reproductive process; GO:0007166 cell surface receptor signaling pathway; GO:0046959 habituation; GO:0007635 chemosensory behavior; GO:0044237 cellular metabolic process; GO:005087…	GO:0044421 extracellular region part; GO:0031982 vesicle; GO:0005737 cytoplasm; GO:0044424 intracellular part; GO:0005623 cell; GO:0032279 asymmetric synapse; GO:0044422 organelle part; GO:0043228 non-membrane-bounded organelle; GO:0031974 membrane-enclosed lumen; GO:0070062 extracellular exosome; GO:0005856 cytoskeleton; GO:0005654 nucleoplasm; GO:0070013 intracellular organelle lumen; GO:000562…	GO:1901265 nucleoside phosphate binding; GO:0016773 phosphotransferase activity, alcohol group as acceptor; GO:0005085 guanyl-nucleotide exchange factor activity; GO:0060589 nucleoside-triphosphatase regulator activity; GO:0030695 GTPase regulator activity; GO:0005515 protein binding; GO:0004672 protein kinase activity; GO:0098772 molecular function regulator; GO:1901363 heterocyclic compound bin…	K15048	KALRN; kalirin [EC:2.7.11.1]		IPR003598; IPR007110; IPR003599; IPR000219; IPR003961; IPR013098; IPR001849; IPR011009; IPR001251; IPR001452; IPR013783; IPR000719; IPR011993;	Immunoglobulin subtype 2; Immunoglobulin-like domain; Immunoglobulin subtype; Dbl homology (DH) domain; Fibronectin type III; Immunoglobulin I-set; Pleckstrin homology domain; Protein kinase-like domain; CRAL-TRIO lipid binding domain; SH3 domain; Immunoglobulin-like fold; Protein kinase domain; PH domain-like;
P01266	Thyroglobulin OS=Homo sapiens OX=9606 GN=TG PE=1 SV=5	39.239	Up	7.0985e-08	TG	304.79	1.3	plasma membrane	GO:0050794 regulation of cellular process; GO:0044700 single organism signaling; GO:0042446 hormone biosynthetic process; GO:0044707 single-multicellular organism process; GO:0065008 regulation of biological quality; GO:0048732 gland development; GO:0031641 regulation of myelination; GO:0006725 cellular aromatic compound metabolic process; GO:1901615 organic hydroxy compound metabolic process; GO…	GO:0005576 extracellular region;	GO:0005515 protein binding; GO:0005102 receptor binding; GO:0005488 binding; GO:0005179 hormone activity;	K10809	TG; thyroglobulin	hsa04918 Thyroid hormone synthesis - Homo sapiens (human); hsa05320 Autoimmune thyroid disease - Homo sapiens (human);	IPR011641; IPR029058; IPR002018; IPR000716;	Tyrosine-protein kinase ephrin type A/B receptor-like; Alpha/Beta hydrolase fold; Carboxylesterase, type B; Thyroglobulin type-1;
Q9NR09	Baculoviral IAP repeat-containing protein 6 OS=Homo sapiens OX=9606 GN=BIRC6 PE=1 SV=2	1.595	Up	0.00187872	BIRC6	530.25	1.2	plasma membrane	GO:0010941 regulation of cell death; GO:0009968 negative regulation of signal transduction; GO:0022414 reproductive process; GO:0043009 chordate embryonic development; GO:0023051 regulation of signaling; GO:0007067 mitotic nuclear division; GO:0001892 embryonic placenta development; GO:0044699 single-organism process; GO:0044237 cellular metabolic process; GO:0010564 regulation of cell cycle proc…	GO:0016020 membrane; GO:0031410 cytoplasmic vesicle; GO:0031982 vesicle; GO:0005737 cytoplasm; GO:0044424 intracellular part; GO:0005623 cell; GO:0044422 organelle part; GO:0043228 non-membrane-bounded organelle; GO:0005856 cytoskeleton; GO:0005815 microtubule organizing center; GO:0015630 microtubule cytoskeleton; GO:0005622 intracellular; GO:0044464 cell part; GO:0098791 Golgi subcompartment; G…	GO:0019787 ubiquitin-like protein transferase activity; GO:0061631 ubiquitin conjugating enzyme activity; GO:0061134 peptidase regulator activity; GO:0005515 protein binding; GO:0004857 enzyme inhibitor activity; GO:0098772 molecular function regulator; GO:0004866 endopeptidase inhibitor activity; GO:0004869 cysteine-type endopeptidase inhibitor activity; GO:0030234 enzyme regulator activity; GO:…	K10586	BIRC6, BRUCE; baculoviral IAP repeat-containing protein 6 (apollon) [EC:2.3.2.23]	hsa04120 Ubiquitin mediated proteolysis - Homo sapiens (human); hsa04215 Apoptosis - multiple species - Homo sapiens (human);	IPR016135; IPR015943; IPR000608;	Ubiquitin-conjugating enzyme/RWD-like; WD40/YVTN repeat-like-containing domain; Ubiquitin-conjugating enzyme E2;
O15260	Surfeit locus protein 4 OS=Homo sapiens OX=9606 GN=SURF4 PE=1 SV=3	0.531	Down	0.002376	SURF4	30.394	14.9	plasma membrane	GO:0050794 regulation of cellular process; GO:0016043 cellular component organization; GO:0010256 endomembrane system organization; GO:0045321 leukocyte activation; GO:0002283 neutrophil activation involved in immune response; GO:0002252 immune effector process; GO:0048193 Golgi vesicle transport; GO:0044699 single-organism process; GO:0050896 response to stimulus; GO:0051234 establishment of loc…	GO:0016020 membrane; GO:0042175 nuclear outer membrane-endoplasmic reticulum membrane network; GO:0005783 endoplasmic reticulum; GO:0031410 cytoplasmic vesicle; GO:0031090 organelle membrane; GO:0071944 cell periphery; GO:0031982 vesicle; GO:0005737 cytoplasm; GO:0044433 cytoplasmic vesicle part; GO:0031224 intrinsic component of membrane; GO:0044424 intracellular part; GO:0005623 cell; GO:004442…	GO:0005515 protein binding; GO:0005488 binding;	K20369	ERV29, SURF4; ER-derived vesicles protein
Q9Y385	Ubiquitin-conjugating enzyme E2 J1 OS=Homo sapiens OX=9606 GN=UBE2J1 PE=1 SV=2	2.504	Up	0.003924	UBE2J1	35.198	9.1	cytoplasm	GO:0043413 macromolecule glycosylation; GO:0022414 reproductive process; GO:0032680 regulation of tumor necrosis factor production; GO:0090317 negative regulation of intracellular protein transport; GO:0036503 ERAD pathway; GO:0018196 peptidyl-asparagine modification; GO:1905897 regulation of response to endoplasmic reticulum stress; GO:0044237 cellular metabolic process; GO:1904293 negative regu…	GO:0043229 intracellular organelle; GO:0016020 membrane; GO:0042175 nuclear outer membrane-endoplasmic reticulum membrane network; GO:0005783 endoplasmic reticulum; GO:0044446 intracellular organelle part; GO:0005737 cytoplasm; GO:0031224 intrinsic component of membrane; GO:0012505 endomembrane system; GO:0044424 intracellular part; GO:0005623 cell; GO:0016021 integral component of membrane; GO:0…	GO:1901265 nucleoside phosphate binding; GO:0031625 ubiquitin protein ligase binding; GO:0005515 protein binding; GO:0097159 organic cyclic compound binding; GO:1901363 heterocyclic compound binding; GO:0061630 ubiquitin protein ligase activity; GO:0003824 catalytic activity; GO:0032553 ribonucleotide binding; GO:0005488 binding; GO:0032550 purine ribonucleoside binding; GO:0043168 anion binding;…	K10578	UBE2J1, NCUBE1, UBC6; ubiquitin-conjugating enzyme E2 J1 [EC:2.3.2.23]	hsa04120 Ubiquitin mediated proteolysis - Homo sapiens (human); hsa04141 Protein processing in endoplasmic reticulum - Homo sapiens (human); hsa05012 Parkinson disease - Homo sapiens (human);	IPR016135; IPR000608;	Ubiquitin-conjugating enzyme/RWD-like; Ubiquitin-conjugating enzyme E2;
P51812	Ribosomal protein S6 kinase alpha-3 OS=Homo sapiens OX=9606 GN=RPS6KA3 PE=1 SV=1	1.618	Up	0.0199182	RPS6KA3	83.735	19.5	nucleus	GO:0044700 single organism signaling; GO:0010941 regulation of cell death; GO:0010608 posttranscriptional regulation of gene expression; GO:0009891 positive regulation of biosynthetic process; GO:0043555 regulation of translation in response to stress; GO:0031347 regulation of defense response; GO:0044237 cellular metabolic process; GO:0045927 positive regulation of growth; GO:0009607 response to…	GO:0043229 intracellular organelle; GO:0044446 intracellular organelle part; GO:0005737 cytoplasm; GO:0031981 nuclear lumen; GO:0044424 intracellular part; GO:0005623 cell; GO:0005829 cytosol; GO:0044422 organelle part; GO:0043231 intracellular membrane-bounded organelle; GO:0043226 organelle; GO:0031974 membrane-enclosed lumen; GO:0005654 nucleoplasm; GO:0005634 nucleus; GO:0070013 intracellular…	GO:1901265 nucleoside phosphate binding; GO:0016773 phosphotransferase activity, alcohol group as acceptor; GO:0019901 protein kinase binding; GO:0061134 peptidase regulator activity; GO:0043028 cysteine-type endopeptidase regulator activity involved in apoptotic process; GO:0005515 protein binding; GO:0004672 protein kinase activity; GO:0004857 enzyme inhibitor activity; GO:0098772 molecular fun…	K04373	RPS6KA; ribosomal protein S6 kinase alpha-1/2/3/6 [EC:2.7.11.1]	hsa04010 MAPK signaling pathway - Homo sapiens (human); hsa04114 Oocyte meiosis - Homo sapiens (human); hsa04150 mTOR signaling pathway - Homo sapiens (human); hsa04714 Thermogenesis - Homo sapiens (human); hsa04720 Long-term potentiation - Homo sapiens (human); hsa04722 Neurotrophin signaling pathway - Homo sapiens (human); hsa04914 Progesterone-mediated oocyte maturation - Homo sapiens (human);…	IPR000719; IPR000961; IPR017892; IPR011009;	Protein kinase domain; AGC-kinase, C-terminal; Protein kinase, C-terminal; Protein kinase-like domain;
Q9NRN5	Olfactomedin-like protein 3 OS=Homo sapiens OX=9606 GN=OLFML3 PE=2 SV=1	10.696	Up	2.2856e-06	OLFML3	46.01	9.9	extracellular	GO:0032502 developmental process; GO:0044707 single-multicellular organism process; GO:0044767 single-organism developmental process; GO:0044699 single-organism process; GO:0007275 multicellular organism development; GO:0032501 multicellular organismal process; GO:0048856 anatomical structure development;	GO:0043226 organelle; GO:0044421 extracellular region part; GO:1903561 extracellular vesicle; GO:0031982 vesicle; GO:0043227 membrane-bounded organelle; GO:0005576 extracellular region; GO:0043230 extracellular organelle;					IPR003112;	Olfactomedin-like domain;
P31949	Protein S100-A11 OS=Homo sapiens OX=9606 GN=S100A11 PE=1 SV=2	0.519	Down	0.00184347	S100A11	11.74	52.4	cytoplasm	GO:0044700 single organism signaling; GO:0045321 leukocyte activation; GO:0044699 single-organism process; GO:0008285 negative regulation of cell proliferation; GO:0051234 establishment of localization; GO:0022610 biological adhesion; GO:0007165 signal transduction; GO:0007154 cell communication; GO:0007155 cell adhesion; GO:0010558 negative regulation of macromolecule biosynthetic process; GO:00…	GO:0034774 secretory granule lumen; GO:0005615 extracellular space; GO:0044421 extracellular region part; GO:0031410 cytoplasmic vesicle; GO:0030054 cell junction; GO:0031982 vesicle; GO:0005737 cytoplasm; GO:0044433 cytoplasmic vesicle part; GO:0044424 intracellular part; GO:0005913 cell-cell adherens junction; GO:0005911 cell-cell junction; GO:0005623 cell; GO:0044422 organelle part; GO:0070062…	GO:0043167 ion binding; GO:0046983 protein dimerization activity; GO:0005515 protein binding; GO:0098632 protein binding involved in cell-cell adhesion; GO:0048306 calcium-dependent protein binding; GO:0050839 cell adhesion molecule binding; GO:0098641 cadherin binding involved in cell-cell adhesion; GO:0042802 identical protein binding; GO:0098631 protein binding involved in cell adhesion; GO:00…				IPR011992; IPR002048; IPR013787;	EF-hand domain pair; EF-hand domain; S100/CaBP-9k-type, calcium binding, subdomain;
Q9HC36	rRNA methyltransferase 3, mitochondrial OS=Homo sapiens OX=9606 GN=MRM3 PE=1 SV=2	1.6	Up	0.0057776	MRM3	47.019	8.3	mitochondria	GO:0044085 cellular component biogenesis; GO:0022613 ribonucleoprotein complex biogenesis; GO:0006725 cellular aromatic compound metabolic process; GO:0000154 rRNA modification; GO:0009451 RNA modification; GO:0044237 cellular metabolic process; GO:0032259 methylation; GO:0071704 organic substance metabolic process; GO:0008152 metabolic process; GO:0046483 heterocycle metabolic process; GO:000613…	GO:0005759 mitochondrial matrix; GO:0043229 intracellular organelle; GO:0044429 mitochondrial part; GO:0005737 cytoplasm; GO:0044446 intracellular organelle part; GO:0044424 intracellular part; GO:0005623 cell; GO:0005739 mitochondrion; GO:0044422 organelle part; GO:0031974 membrane-enclosed lumen; GO:0043226 organelle; GO:0043231 intracellular membrane-bounded organelle; GO:0070013 intracellular…	GO:0008757 S-adenosylmethionine-dependent methyltransferase activity; GO:0003723 RNA binding; GO:0008168 methyltransferase activity; GO:0016741 transferase activity, transferring one-carbon groups; GO:0005515 protein binding; GO:0008171 O-methyltransferase activity; GO:0070039 rRNA (guanosine-2'-O-)-methyltransferase activity; GO:0016435 rRNA (guanine) methyltransferase activity; GO:1901363 heter…	K20095	RNMTL1; 16S rRNA (guanosine(1370)-2'-O)-methyltransferase [EC:2.1.1.-]		IPR001537; IPR029028; IPR029064; IPR013123; IPR029026;	tRNA/rRNA methyltransferase, SpoU type; Alpha/beta knot methyltransferases; 50S ribosomal protein L30e-like; RNA 2-O ribose methyltransferase, substrate binding; tRNA (guanine-N1-)-methyltransferase, N-terminal;
P08648	Integrin alpha-5 OS=Homo sapiens OX=9606 GN=ITGA5 PE=1 SV=2	1.615	Up	0.040416	ITGA5	114.54	9.1	nucleus	GO:0044700 single organism signaling; GO:0044085 cellular component biogenesis; GO:0044409 entry into host; GO:0010941 regulation of cell death; GO:0030335 positive regulation of cell migration; GO:0032270 positive regulation of cellular protein metabolic process; GO:0007166 cell surface receptor signaling pathway; GO:0050877 neurological system process; GO:0007610 behavior; GO:0007492 endoderm d…	GO:0016020 membrane; GO:0098636 protein complex involved in cell adhesion; GO:0005783 endoplasmic reticulum; GO:0009897 external side of plasma membrane; GO:0031410 cytoplasmic vesicle; GO:0098796 membrane protein complex; GO:0030054 cell junction; GO:0071944 cell periphery; GO:0031982 vesicle; GO:0005737 cytoplasm; GO:0032991 macromolecular complex; GO:0031224 intrinsic component of membrane; GO…	GO:0005102 receptor binding; GO:0043167 ion binding; GO:0005126 cytokine receptor binding; GO:0044877 macromolecular complex binding; GO:0070851 growth factor receptor binding; GO:0005172 vascular endothelial growth factor receptor binding; GO:0005515 protein binding; GO:0005178 integrin binding; GO:0001618 virus receptor activity; GO:0050839 cell adhesion molecule binding; GO:0005161 platelet-de…	K06484	ITGA5, CD49e; integrin alpha 5	hsa04145 Phagosome - Homo sapiens (human); hsa04151 PI3K-Akt signaling pathway - Homo sapiens (human); hsa04510 Focal adhesion - Homo sapiens (human); hsa04512 ECM-receptor interaction - Homo sapiens (human); hsa04640 Hematopoietic cell lineage - Homo sapiens (human); hsa04810 Regulation of actin cytoskeleton - Homo sapiens (human); hsa05100 Bacterial invasion of epithelial cells - Homo sapiens (…	IPR032695; IPR013649;	Integrin domain; Integrin alpha-2;
Q9P121	Neurotrimin OS=Homo sapiens OX=9606 GN=NTM PE=1 SV=1	1.559	Up	0.00193755	NTM	37.971	8.7	plasma membrane	GO:0043687 post-translational protein modification; GO:0044707 single-multicellular organism process; GO:0048666 neuron development; GO:0048869 cellular developmental process; GO:0044267 cellular protein metabolic process; GO:0044699 single-organism process; GO:0022008 neurogenesis; GO:0009058 biosynthetic process; GO:0008038 neuron recognition; GO:0008037 cell recognition; GO:0044237 cellular me…	GO:0016020 membrane; GO:0044464 cell part; GO:0071944 cell periphery; GO:0044425 membrane part; GO:0031225 anchored component of membrane; GO:0031224 intrinsic component of membrane; GO:0005623 cell; GO:0005576 extracellular region; GO:0005886 plasma membrane;	GO:0005515 protein binding; GO:0005488 binding;	K06774	HNT; neurotrimin		IPR003598; IPR007110; IPR013783; IPR003599; IPR013151; IPR013098;	Immunoglobulin subtype 2; Immunoglobulin-like domain; Immunoglobulin-like fold; Immunoglobulin subtype; Immunoglobulin; Immunoglobulin I-set;
Q9UNL2	Translocon-associated protein subunit gamma OS=Homo sapiens OX=9606 GN=SSR3 PE=1 SV=1	0.551	Down	0.00126477	SSR3	21.08	16.2	plasma membrane	GO:0046907 intracellular transport; GO:0072599 establishment of protein localization to endoplasmic reticulum; GO:0072594 establishment of protein localization to organelle; GO:0072657 protein localization to membrane; GO:0045047 protein targeting to ER; GO:0071702 organic substance transport; GO:0006613 cotranslational protein targeting to membrane; GO:0015031 protein transport; GO:0051641 cellu…	GO:0043229 intracellular organelle; GO:0016020 membrane; GO:0042175 nuclear outer membrane-endoplasmic reticulum membrane network; GO:0005783 endoplasmic reticulum; GO:0044446 intracellular organelle part; GO:0005737 cytoplasm; GO:0031224 intrinsic component of membrane; GO:0012505 endomembrane system; GO:0044424 intracellular part; GO:0005623 cell; GO:0016021 integral component of membrane; GO:0…		K13251	SSR3; translocon-associated protein subunit gamma	hsa04141 Protein processing in endoplasmic reticulum - Homo sapiens (human);
Q16878	Cysteine dioxygenase type 1 OS=Homo sapiens OX=9606 GN=CDO1 PE=1 SV=2	0.411	Down	0.0074049	CDO1	22.972	8.5	cytoplasm	GO:1901606 alpha-amino acid catabolic process; GO:0001101 response to acid chemical; GO:0065008 regulation of biological quality; GO:0000097 sulfur amino acid biosynthetic process; GO:0048732 gland development; GO:0016053 organic acid biosynthetic process; GO:0046683 response to organophosphorus; GO:0044699 single-organism process; GO:0009058 biosynthetic process; GO:0044237 cellular metabolic pr…	GO:0044464 cell part; GO:0005622 intracellular; GO:0005737 cytoplasm; GO:0044424 intracellular part; GO:0005829 cytosol; GO:0005623 cell; GO:0044444 cytoplasmic part;	GO:0016702 oxidoreductase activity, acting on single donors with incorporation of molecular oxygen, incorporation of two atoms of oxygen; GO:0005506 iron ion binding; GO:0017172 cysteine dioxygenase activity; GO:0016701 oxidoreductase activity, acting on single donors with incorporation of molecular oxygen; GO:0046914 transition metal ion binding; GO:0003824 catalytic activity; GO:0005488 binding…	K00456	CDO1; cysteine dioxygenase [EC:1.13.11.20]	hsa00270 Cysteine and methionine metabolism - Homo sapiens (human); hsa00430 Taurine and hypotaurine metabolism - Homo sapiens (human); hsa01100 Metabolic pathways - Homo sapiens (human);	IPR011051; IPR014710;	RmlC-like cupin domain; RmlC-like jelly roll fold;
Q7LBR1	Charged multivesicular body protein 1b OS=Homo sapiens OX=9606 GN=CHMP1B PE=1 SV=1	0.591	Down	8.3558e-05	CHMP1B	22.109	11.6	nucleus	GO:0044085 cellular component biogenesis; GO:0010256 endomembrane system organization; GO:0007067 mitotic nuclear division; GO:0044699 single-organism process; GO:0044764 multi-organism cellular process; GO:0060236 regulation of mitotic spindle organization; GO:0010564 regulation of cell cycle process; GO:1902115 regulation of organelle assembly; GO:0015031 protein transport; GO:0043241 protein c…	GO:0016020 membrane; GO:0044421 extracellular region part; GO:0031410 cytoplasmic vesicle; GO:0031090 organelle membrane; GO:0098796 membrane protein complex; GO:0005737 cytoplasm; GO:0031982 vesicle; GO:0044433 cytoplasmic vesicle part; GO:0032991 macromolecular complex; GO:0044424 intracellular part; GO:0005623 cell; GO:0044422 organelle part; GO:0070062 extracellular exosome; GO:0036452 ESCRT …	GO:0019904 protein domain specific binding; GO:0005515 protein binding; GO:0005488 binding;	K12197	CHMP1, VPS46, DID2; charged multivesicular body protein 1	hsa04144 Endocytosis - Homo sapiens (human); hsa04217 Necroptosis - Homo sapiens (human);
Q3V6T2	Girdin OS=Homo sapiens OX=9606 GN=CCDC88A PE=1 SV=2	3.614	Up	0.00026208	CCDC88A	216.04	4.6	nucleus	GO:0044085 cellular component biogenesis; GO:0044700 single organism signaling; GO:0032270 positive regulation of cellular protein metabolic process; GO:0060491 regulation of cell projection assembly; GO:0044237 cellular metabolic process; GO:0031929 TOR signaling; GO:0008152 metabolic process; GO:0032879 regulation of localization; GO:0044093 positive regulation of molecular function; GO:0042327…	GO:0016020 membrane; GO:0005783 endoplasmic reticulum; GO:0044450 microtubule organizing center part; GO:0031410 cytoplasmic vesicle; GO:0071944 cell periphery; GO:0031982 vesicle; GO:0005737 cytoplasm; GO:0044424 intracellular part; GO:0005623 cell; GO:0044422 organelle part; GO:0043228 non-membrane-bounded organelle; GO:0005856 cytoskeleton; GO:0005815 microtubule organizing center; GO:0015630 …	GO:0046983 protein dimerization activity; GO:0043167 ion binding; GO:0019901 protein kinase binding; GO:0015631 tubulin binding; GO:0005515 protein binding; GO:0019900 kinase binding; GO:0051959 dynein light intermediate chain binding; GO:0043422 protein kinase B binding; GO:0042802 identical protein binding; GO:0008092 cytoskeletal protein binding; GO:0042803 protein homodimerization activity; G…
Q9NPA8	Transcription and mRNA export factor ENY2 OS=Homo sapiens OX=9606 GN=ENY2 PE=1 SV=1	0.655	Down	0.0157581	ENY2	11.528	34.7	cytoplasm	GO:0050658 RNA transport; GO:0065008 regulation of biological quality; GO:0097659 nucleic acid-templated transcription; GO:0050796 regulation of insulin secretion; GO:0009891 positive regulation of biosynthetic process; GO:0051169 nuclear transport; GO:0044237 cellular metabolic process; GO:0015031 protein transport; GO:0008152 metabolic process; GO:0032879 regulation of localization; GO:0015931 …	GO:0000124 SAGA complex; GO:0070461 SAGA-type complex; GO:0005737 cytoplasm; GO:0032991 macromolecular complex; GO:0044424 intracellular part; GO:0005623 cell; GO:0000123 histone acetyltransferase complex; GO:0044422 organelle part; GO:0031974 membrane-enclosed lumen; GO:1902494 catalytic complex; GO:0005654 nucleoplasm; GO:0031248 protein acetyltransferase complex; GO:0070013 intracellular organ…	GO:0000989 transcription factor activity, transcription factor binding; GO:0003713 transcription coactivator activity; GO:0003682 chromatin binding; GO:0030374 ligand-dependent nuclear receptor transcription coactivator activity; GO:0003712 transcription cofactor activity; GO:0000988 transcription factor activity, protein binding; GO:0005488 binding;	K11368	ENY2, DC6, SUS1; enhancer of yellow 2 transcription factor
Q13951	Core-binding factor subunit beta OS=Homo sapiens OX=9606 GN=CBFB PE=1 SV=2	2.184	Up	6.2567e-05	CBFB	21.508	5.5	nucleus	GO:0001649 osteoblast differentiation; GO:0021700 developmental maturation; GO:0045321 leukocyte activation; GO:0097659 nucleic acid-templated transcription; GO:0048869 cellular developmental process; GO:0009891 positive regulation of biosynthetic process; GO:0044699 single-organism process; GO:0009058 biosynthetic process; GO:0044237 cellular metabolic process; GO:2001141 regulation of RNA biosy…	GO:0043226 organelle; GO:0043231 intracellular membrane-bounded organelle; GO:0043229 intracellular organelle; GO:0016020 membrane; GO:0005634 nucleus; GO:0044464 cell part; GO:0005622 intracellular; GO:0044424 intracellular part; GO:0043227 membrane-bounded organelle; GO:0005623 cell;	GO:0097159 organic cyclic compound binding; GO:1901363 heterocyclic compound binding; GO:0003677 DNA binding; GO:0005488 binding; GO:0001071 nucleic acid binding transcription factor activity; GO:0003676 nucleic acid binding; GO:0000989 transcription factor activity, transcription factor binding; GO:0003713 transcription coactivator activity; GO:0005515 protein binding; GO:0003712 transcription c…
P36578	60S ribosomal protein L4 OS=Homo sapiens OX=9606 GN=RPL4 PE=1 SV=5	0.63	Down	7.8357e-05	RPL4	47.697	39.8	cytoplasm	GO:0044085 cellular component biogenesis; GO:0022613 ribonucleoprotein complex biogenesis; GO:0072594 establishment of protein localization to organelle; GO:0006518 peptide metabolic process; GO:0009058 biosynthetic process; GO:0044764 multi-organism cellular process; GO:0044237 cellular metabolic process; GO:0015031 protein transport; GO:0051234 establishment of localization; GO:0006605 protein …	GO:0016020 membrane; GO:0044421 extracellular region part; GO:0030054 cell junction; GO:0031982 vesicle; GO:0005737 cytoplasm; GO:0032991 macromolecular complex; GO:0044424 intracellular part; GO:0005623 cell; GO:0044422 organelle part; GO:0043228 non-membrane-bounded organelle; GO:0070062 extracellular exosome; GO:0031974 membrane-enclosed lumen; GO:0005925 focal adhesion; GO:0070013 intracellul…	GO:0097159 organic cyclic compound binding; GO:1901363 heterocyclic compound binding; GO:0003723 RNA binding; GO:0005488 binding; GO:0003676 nucleic acid binding; GO:0005515 protein binding; GO:0005198 structural molecule activity; GO:0003735 structural constituent of ribosome;	K02930	RP-L4e, RPL4; large subunit ribosomal protein L4e	hsa03010 Ribosome - Homo sapiens (human);	IPR023574; IPR025755;	Ribosomal protein L4 domain; 60S ribosomal protein L4, C-terminal domain;
Q14653	Interferon regulatory factor 3 OS=Homo sapiens OX=9606 GN=IRF3 PE=1 SV=1	1.598	Up	0.00164495	IRF3	47.219	3.3	cytoplasm	GO:0044700 single organism signaling; GO:0032481 positive regulation of type I interferon production; GO:0007166 cell surface receptor signaling pathway; GO:0097659 nucleic acid-templated transcription; GO:0032647 regulation of interferon-alpha production; GO:0098542 defense response to other organism; GO:0031347 regulation of defense response; GO:0044237 cellular metabolic process; GO:0071345 ce…	GO:0043229 intracellular organelle; GO:0044446 intracellular organelle part; GO:0005737 cytoplasm; GO:0031981 nuclear lumen; GO:0044424 intracellular part; GO:0005829 cytosol; GO:0005623 cell; GO:0044422 organelle part; GO:0043226 organelle; GO:0043231 intracellular membrane-bounded organelle; GO:0031974 membrane-enclosed lumen; GO:0005654 nucleoplasm; GO:0005634 nucleus; GO:0070013 intracellular…	GO:0000981 RNA polymerase II transcription factor activity, sequence-specific DNA binding; GO:0003677 DNA binding; GO:0000976 transcription regulatory region sequence-specific DNA binding; GO:0003690 double-stranded DNA binding; GO:0046983 protein dimerization activity; GO:1990837 sequence-specific double-stranded DNA binding; GO:0001012 RNA polymerase II regulatory region DNA binding; GO:0005515…	K05411	IRF3; interferon regulatory factor 3	hsa04620 Toll-like receptor signaling pathway - Homo sapiens (human); hsa04621 NOD-like receptor signaling pathway - Homo sapiens (human); hsa04622 RIG-I-like receptor signaling pathway - Homo sapiens (human); hsa04623 Cytosolic DNA-sensing pathway - Homo sapiens (human); hsa05133 Pertussis - Homo sapiens (human); hsa05160 Hepatitis C - Homo sapiens (human); hsa05161 Hepatitis B - Homo sapiens (h…	IPR011991; IPR017855; IPR001346; IPR008984; IPR019471;	Winged helix-turn-helix DNA-binding domain; SMAD domain-like; Interferon regulatory factor DNA-binding domain; SMAD/FHA domain; Interferon regulatory factor-3;
Q6ZT62	Bargin OS=Homo sapiens OX=9606 GN=BARGIN PE=1 SV=2	3.232	Up	0.027457	BARGIN	73.599	3.1	nucleus	GO:0050794 regulation of cellular process; GO:0044700 single organism signaling; GO:0051716 cellular response to stimulus; GO:0007165 signal transduction; GO:0050789 regulation of biological process; GO:0007154 cell communication; GO:0044699 single-organism process; GO:0023052 signaling; GO:0050896 response to stimulus; GO:0009987 cellular process; GO:0065007 biological regulation;	GO:0044424 intracellular part; GO:0005623 cell; GO:0044464 cell part; GO:0005622 intracellular; GO:0005737 cytoplasm;	GO:0005515 protein binding; GO:0005488 binding;	K20652	SH3BP1, ARHGAP43; SH3-domain binding protein 1		IPR027267; IPR004148; IPR008936; IPR023214; IPR000198;	Arfaptin homology (AH) domain/BAR domain; BAR domain; Rho GTPase activation protein; HAD-like domain; Rho GTPase-activating protein domain;
Q9P0J7	E3 ubiquitin-protein ligase KCMF1 OS=Homo sapiens OX=9606 GN=KCMF1 PE=1 SV=2	0.474	Down	0.0161435	KCMF1	41.945	4.7	nucleus	GO:0045321 leukocyte activation; GO:0002283 neutrophil activation involved in immune response; GO:0002252 immune effector process; GO:0044699 single-organism process; GO:0050896 response to stimulus; GO:0051234 establishment of localization; GO:1902578 single-organism localization; GO:0002275 myeloid cell activation involved in immune response; GO:0036230 granulocyte activation; GO:0009987 cellul…	GO:0043229 intracellular organelle; GO:0097708 intracellular vesicle; GO:0031410 cytoplasmic vesicle; GO:0005737 cytoplasm; GO:0044446 intracellular organelle part; GO:0031982 vesicle; GO:0044433 cytoplasmic vesicle part; GO:0012505 endomembrane system; GO:0044424 intracellular part; GO:0005623 cell; GO:0005576 extracellular region; GO:1904813 ficolin-1-rich granule lumen; GO:0044422 organelle pa…	GO:0046914 transition metal ion binding; GO:0003824 catalytic activity; GO:0005488 binding; GO:0043167 ion binding; GO:0043169 cation binding; GO:0046872 metal ion binding; GO:0008270 zinc ion binding; GO:0016740 transferase activity;	K22376			IPR015880; IPR008598; IPR007087; IPR000433;	Zinc finger, C2H2-like; Drought induced 19 protein type, zinc-binding domain; Zinc finger, C2H2; Zinc finger, ZZ-type;
Q9Y6A9	Signal peptidase complex subunit 1 OS=Homo sapiens OX=9606 GN=SPCS1 PE=1 SV=4	0.666	Down	0.049619	SPCS1	11.805	16.7	plasma membrane	GO:0046907 intracellular transport; GO:0072594 establishment of protein localization to organelle; GO:0006518 peptide metabolic process; GO:0006465 signal peptide processing; GO:0044267 cellular protein metabolic process; GO:0016485 protein processing; GO:0044237 cellular metabolic process; GO:0015031 protein transport; GO:0051234 establishment of localization; GO:0071704 organic substance metabo…	GO:0016020 membrane; GO:0043229 intracellular organelle; GO:0042175 nuclear outer membrane-endoplasmic reticulum membrane network; GO:0005783 endoplasmic reticulum; GO:0031090 organelle membrane; GO:0098796 membrane protein complex; GO:0044446 intracellular organelle part; GO:0005737 cytoplasm; GO:0031224 intrinsic component of membrane; GO:0032991 macromolecular complex; GO:0012505 endomembrane …	GO:0005515 protein binding; GO:0008233 peptidase activity; GO:0016787 hydrolase activity; GO:0003824 catalytic activity; GO:0005488 binding;	K12946	SPCS1; signal peptidase complex subunit 1 [EC:3.4.-.-]	hsa03060 Protein export - Homo sapiens (human);
P63241	Eukaryotic translation initiation factor 5A-1 OS=Homo sapiens OX=9606 GN=EIF5A PE=1 SV=2	0.503	Down	0.000156915	EIF5A	16.832	55.8	cytoplasm	GO:0050658 RNA transport; GO:0006518 peptide metabolic process; GO:0032270 positive regulation of cellular protein metabolic process; GO:0010608 posttranscriptional regulation of gene expression; GO:0043243 positive regulation of protein complex disassembly; GO:0006449 regulation of translational termination; GO:0009891 positive regulation of biosynthetic process; GO:0044699 single-organism proce…	GO:0016020 membrane; GO:0042175 nuclear outer membrane-endoplasmic reticulum membrane network; GO:0044421 extracellular region part; GO:0005783 endoplasmic reticulum; GO:0031982 vesicle; GO:0005737 cytoplasm; GO:0032991 macromolecular complex; GO:0044424 intracellular part; GO:0005623 cell; GO:0044422 organelle part; GO:0070062 extracellular exosome; GO:0005642 annulate lamellae; GO:0044425 membr…	GO:0043022 ribosome binding; GO:0097159 organic cyclic compound binding; GO:1901363 heterocyclic compound binding; GO:0008135 translation factor activity, RNA binding; GO:0003723 RNA binding; GO:0047485 protein N-terminus binding; GO:0003746 translation elongation factor activity; GO:0017070 U6 snRNA binding; GO:0005488 binding; GO:0044877 macromolecular complex binding; GO:0003676 nucleic acid b…	K03263	EIF5A; translation initiation factor 5A		IPR008991; IPR012340; IPR014722; IPR020189;	Translation protein SH3-like domain; Nucleic acid-binding, OB-fold; Ribosomal protein L2 domain 2; Translation elongation factor, IF5A C-terminal;
P54289	Voltage-dependent calcium channel subunit alpha-2/delta-1 OS=Homo sapiens OX=9606 GN=CACNA2D1 PE=1 SV=3	1.776	Up	0.002215	CACNA2D1	124.57	19.9	plasma membrane	GO:0044700 single organism signaling; GO:0065008 regulation of biological quality; GO:1904427 positive regulation of calcium ion transmembrane transport; GO:0061337 cardiac conduction; GO:0098900 regulation of action potential; GO:1901019 regulation of calcium ion transmembrane transporter activity; GO:0032879 regulation of localization; GO:0044093 positive regulation of molecular function; GO:00…	GO:0016020 membrane; GO:0044421 extracellular region part; GO:0005783 endoplasmic reticulum; GO:0071944 cell periphery; GO:0031982 vesicle; GO:0005737 cytoplasm; GO:0032991 macromolecular complex; GO:0031224 intrinsic component of membrane; GO:0044424 intracellular part; GO:0005623 cell; GO:0016528 sarcoplasm; GO:0030315 T-tubule; GO:0070062 extracellular exosome; GO:0044425 membrane part; GO:000…	GO:0005245 voltage-gated calcium channel activity; GO:0015075 ion transmembrane transporter activity; GO:0043167 ion binding; GO:0022803 passive transmembrane transporter activity; GO:0022892 substrate-specific transporter activity; GO:0015267 channel activity; GO:0022891 substrate-specific transmembrane transporter activity; GO:0005244 voltage-gated ion channel activity; GO:0046873 metal ion tra…	K04859	CACNA2D2; voltage-dependent calcium channel alpha-2/delta-2	hsa04010 MAPK signaling pathway - Homo sapiens (human); hsa04260 Cardiac muscle contraction - Homo sapiens (human); hsa04261 Adrenergic signaling in cardiomyocytes - Homo sapiens (human); hsa04921 Oxytocin signaling pathway - Homo sapiens (human); hsa05410 Hypertrophic cardiomyopathy (HCM) - Homo sapiens (human); hsa05412 Arrhythmogenic right ventricular cardiomyopathy (ARVC) - Homo sapiens (huma…	IPR013680; IPR013608; IPR002035;	Voltage-dependent calcium channel, alpha-2/delta subunit, conserved region; VWA N-terminal; von Willebrand factor, type A;
Q12888	TP53-binding protein 1 OS=Homo sapiens OX=9606 GN=TP53BP1 PE=1 SV=2	1.58	Up	0.0094203	TP53BP1	213.57	16.8	nucleus	GO:0097659 nucleic acid-templated transcription; GO:0009891 positive regulation of biosynthetic process; GO:0009058 biosynthetic process; GO:0044237 cellular metabolic process; GO:2001141 regulation of RNA biosynthetic process; GO:0008152 metabolic process; GO:0000077 DNA damage checkpoint; GO:0009893 positive regulation of metabolic process; GO:0051173 positive regulation of nitrogen compound me…	GO:0005737 cytoplasm; GO:0032991 macromolecular complex; GO:0044424 intracellular part; GO:0016604 nuclear body; GO:0005623 cell; GO:0000777 condensed chromosome kinetochore; GO:0044422 organelle part; GO:0043228 non-membrane-bounded organelle; GO:0044427 chromosomal part; GO:0000793 condensed chromosome; GO:0031974 membrane-enclosed lumen; GO:0005654 nucleoplasm; GO:0070013 intracellular organel…	GO:0042393 histone binding; GO:0003677 DNA binding; GO:0035064 methylated histone binding; GO:0005515 protein binding; GO:0003712 transcription cofactor activity; GO:0001102 RNA polymerase II activating transcription factor binding; GO:0033613 activating transcription factor binding; GO:1901363 heterocyclic compound binding; GO:0097159 organic cyclic compound binding; GO:0002039 p53 binding; GO:0…	K20915	TP53BP1, P202; tumor suppressor p53-binding protein 1	hsa04621 NOD-like receptor signaling pathway - Homo sapiens (human);	IPR015125; IPR014722; IPR001357;	Tumour suppressor p53-binding protein-1 Tudor domain; Ribosomal protein L2 domain 2; BRCT domain;
Q86Y38	Xylosyltransferase 1 OS=Homo sapiens OX=9606 GN=XYLT1 PE=1 SV=1	3.428	Up	1.67926e-05	XYLT1	107.57	1.5	endoplasmic reticulum,Golgi apparatus	GO:0030201 heparan sulfate proteoglycan metabolic process; GO:0030206 chondroitin sulfate biosynthetic process; GO:0006024 glycosaminoglycan biosynthetic process; GO:0044699 single-organism process; GO:0009058 biosynthetic process; GO:1901566 organonitrogen compound biosynthetic process; GO:0044237 cellular metabolic process; GO:0044272 sulfur compound biosynthetic process; GO:0071704 organic sub…	GO:0043229 intracellular organelle; GO:0016020 membrane; GO:0042175 nuclear outer membrane-endoplasmic reticulum membrane network; GO:0005783 endoplasmic reticulum; GO:0098588 bounding membrane of organelle; GO:0031090 organelle membrane; GO:0044446 intracellular organelle part; GO:0005737 cytoplasm; GO:0000139 Golgi membrane; GO:0031224 intrinsic component of membrane; GO:0012505 endomembrane sy…	GO:0008375 acetylglucosaminyltransferase activity; GO:0016763 transferase activity, transferring pentosyl groups; GO:0030158 protein xylosyltransferase activity; GO:0016758 transferase activity, transferring hexosyl groups; GO:0042285 xylosyltransferase activity; GO:0003824 catalytic activity; GO:0035252 UDP-xylosyltransferase activity; GO:0008194 UDP-glycosyltransferase activity; GO:0016757 tran…	K00771	XYLT; protein xylosyltransferase [EC:2.4.2.26]	hsa00532 Glycosaminoglycan biosynthesis - chondroitin sulfate / dermatan sulfate - Homo sapiens (human); hsa00534 Glycosaminoglycan biosynthesis - heparan sulfate / heparin - Homo sapiens (human); hsa01100 Metabolic pathways - Homo sapiens (human);
O95816	BAG family molecular chaperone regulator 2 OS=Homo sapiens OX=9606 GN=BAG2 PE=1 SV=1	0.504	Down	0.043316	BAG2	23.772	51.2	cytoplasm	GO:0050794 regulation of cellular process; GO:0080134 regulation of response to stress; GO:0044238 primary metabolic process; GO:0071704 organic substance metabolic process; GO:0006457 protein folding; GO:0008152 metabolic process; GO:0050789 regulation of biological process; GO:0080135 regulation of cellular response to stress; GO:0050790 regulation of catalytic activity; GO:0048583 regulation o…	GO:0044464 cell part; GO:0005622 intracellular; GO:0005737 cytoplasm; GO:0044424 intracellular part; GO:0005829 cytosol; GO:0005623 cell; GO:0044444 cytoplasmic part;	GO:1901265 nucleoside phosphate binding; GO:0051087 chaperone binding; GO:0060589 nucleoside-triphosphatase regulator activity; GO:0005515 protein binding; GO:0000166 nucleotide binding; GO:0098772 molecular function regulator; GO:1901363 heterocyclic compound binding; GO:0097159 organic cyclic compound binding; GO:0042802 identical protein binding; GO:0030234 enzyme regulator activity; GO:000548…	K09556	BAG2; BCL2-associated athanogene 2	hsa04141 Protein processing in endoplasmic reticulum - Homo sapiens (human);	IPR003103;	BAG domain;
Q9BVJ7	Dual specificity protein phosphatase 23 OS=Homo sapiens OX=9606 GN=DUSP23 PE=1 SV=1	3.157	Up	0.000118402	DUSP23	16.588	8	cytoplasm	GO:0035335 peptidyl-tyrosine dephosphorylation; GO:0044267 cellular protein metabolic process; GO:0044238 primary metabolic process; GO:0006470 protein dephosphorylation; GO:0016311 dephosphorylation; GO:0044237 cellular metabolic process; GO:0006796 phosphate-containing compound metabolic process; GO:0071704 organic substance metabolic process; GO:0008152 metabolic process; GO:0006793 phosphorus…	GO:0043229 intracellular organelle; GO:0044421 extracellular region part; GO:0005737 cytoplasm; GO:0044446 intracellular organelle part; GO:0031982 vesicle; GO:0031981 nuclear lumen; GO:0044424 intracellular part; GO:0005829 cytosol; GO:0005623 cell; GO:0005576 extracellular region; GO:0044422 organelle part; GO:0031974 membrane-enclosed lumen; GO:0043226 organelle; GO:0070062 extracellular exoso…	GO:0004725 protein tyrosine phosphatase activity; GO:0003824 catalytic activity; GO:0042578 phosphoric ester hydrolase activity; GO:0005488 binding; GO:0004722 protein serine/threonine phosphatase activity; GO:0016791 phosphatase activity; GO:0016788 hydrolase activity, acting on ester bonds; GO:0005515 protein binding; GO:0016787 hydrolase activity; GO:0008138 protein tyrosine/serine/threonine p…	K14165	K14165; atypical dual specificity phosphatase [EC:3.1.3.16 3.1.3.48]		IPR029021; IPR000387; IPR003595; IPR000340; IPR020422;	Protein-tyrosine phosphatase-like; Tyrosine specific protein phosphatases domain; Protein-tyrosine phosphatase, catalytic; Dual specificity phosphatase, catalytic domain; Dual specificity protein phosphatase domain;
Q92688	Acidic leucine-rich nuclear phosphoprotein 32 family member B OS=Homo sapiens OX=9606 GN=ANP32B PE=1 SV=1	0.518	Down	0.0003041	ANP32B	28.787	28.7	cytoplasm	GO:0044085 cellular component biogenesis; GO:0051093 negative regulation of developmental process; GO:0010941 regulation of cell death; GO:0032270 positive regulation of cellular protein metabolic process; GO:0007420 brain development; GO:0044699 single-organism process; GO:0006334 nucleosome assembly; GO:0009893 positive regulation of metabolic process; GO:0022607 cellular component assembly; GO…	GO:0043229 intracellular organelle; GO:0044421 extracellular region part; GO:0005737 cytoplasm; GO:0031982 vesicle; GO:0044424 intracellular part; GO:0005623 cell; GO:0005576 extracellular region; GO:0043226 organelle; GO:0070062 extracellular exosome; GO:0043231 intracellular membrane-bounded organelle; GO:0005634 nucleus; GO:0005622 intracellular; GO:0044464 cell part; GO:1903561 extracellular …	GO:0042393 histone binding; GO:0005515 protein binding; GO:0070063 RNA polymerase binding; GO:0019899 enzyme binding; GO:0005488 binding;	K18647	ANP32B; acidic leucine-rich nuclear phosphoprotein 32 family member B		IPR003603; IPR032675;	U2A'/phosphoprotein 32 family A, C-terminal; Leucine-rich repeat domain, L domain-like;
Q3KQV9	UDP-N-acetylhexosamine pyrophosphorylase-like protein 1 OS=Homo sapiens OX=9606 GN=UAP1L1 PE=1 SV=2	1.607	Up	5.8993e-05	UAP1L1	57.03	21.5	nucleus	GO:0009226 nucleotide-sugar biosynthetic process; GO:0006047 UDP-N-acetylglucosamine metabolic process; GO:0018130 heterocycle biosynthetic process; GO:0006725 cellular aromatic compound metabolic process; GO:0034654 nucleobase-containing compound biosynthetic process; GO:0006807 nitrogen compound metabolic process; GO:1901360 organic cyclic compound metabolic process; GO:0009058 biosynthetic pro…	GO:0044464 cell part; GO:0005622 intracellular; GO:0005737 cytoplasm; GO:0044424 intracellular part; GO:0005829 cytosol; GO:0005623 cell; GO:0044444 cytoplasmic part;	GO:0003977 UDP-N-acetylglucosamine diphosphorylase activity; GO:0016779 nucleotidyltransferase activity; GO:0003824 catalytic activity; GO:0016740 transferase activity; GO:0070569 uridylyltransferase activity; GO:0016772 transferase activity, transferring phosphorus-containing groups;	K00972	UAP1; UDP-N-acetylglucosamine/UDP-N-acetylgalactosamine diphosphorylase [EC:2.7.7.23 2.7.7.83]	hsa00520 Amino sugar and nucleotide sugar metabolism - Homo sapiens (human); hsa01100 Metabolic pathways - Homo sapiens (human);	IPR029044;	Nucleotide-diphospho-sugar transferases;
O14773	Tripeptidyl-peptidase 1 OS=Homo sapiens OX=9606 GN=TPP1 PE=1 SV=2	0.522	Down	0.015917	TPP1	61.247	5.5	extracellular	GO:0044700 single organism signaling; GO:0065008 regulation of biological quality; GO:0006518 peptide metabolic process; GO:0048869 cellular developmental process; GO:0044699 single-organism process; GO:0044237 cellular metabolic process; GO:0050877 neurological system process; GO:0048871 multicellular organismal homeostasis; GO:0030968 endoplasmic reticulum unfolded protein response; GO:0008152 …	GO:0097708 intracellular vesicle; GO:0043229 intracellular organelle; GO:0044421 extracellular region part; GO:0031410 cytoplasmic vesicle; GO:0042470 melanosome; GO:0044446 intracellular organelle part; GO:0005737 cytoplasm; GO:0031982 vesicle; GO:0044424 intracellular part; GO:0005623 cell; GO:0005576 extracellular region; GO:0043202 lysosomal lumen; GO:0005739 mitochondrion; GO:0044422 organel…	GO:0008238 exopeptidase activity; GO:0008233 peptidase activity; GO:0043167 ion binding; GO:0008236 serine-type peptidase activity; GO:0016787 hydrolase activity; GO:0005515 protein binding; GO:0033218 amide binding; GO:0004175 endopeptidase activity; GO:0004252 serine-type endopeptidase activity; GO:0003824 catalytic activity; GO:0017171 serine hydrolase activity; GO:0042277 peptide binding; GO:…	K01279	TPP1, CLN2; tripeptidyl-peptidase I [EC:3.4.14.9]	hsa04142 Lysosome - Homo sapiens (human);	IPR009020; IPR000209; IPR030400; IPR015366;	Proteinase propeptide inhibitor; Peptidase S8/S53 domain; Sedolisin domain; Peptidase S53, activation domain;
Q9BW27	Nuclear pore complex protein Nup85 OS=Homo sapiens OX=9606 GN=NUP85 PE=1 SV=1	0.548	Down	0.00156157	NUP85	75.019	5	cytoplasm	GO:0044085 cellular component biogenesis; GO:0050658 RNA transport; GO:0009891 positive regulation of biosynthetic process; GO:0051169 nuclear transport; GO:0044237 cellular metabolic process; GO:0015031 protein transport; GO:1902583 multi-organism intracellular transport; GO:0009605 response to external stimulus; GO:0008152 metabolic process; GO:0044033 multi-organism metabolic process; GO:00328…	GO:0016020 membrane; GO:0031090 organelle membrane; GO:0005737 cytoplasm; GO:0032991 macromolecular complex; GO:0044424 intracellular part; GO:0005623 cell; GO:0000777 condensed chromosome kinetochore; GO:0044422 organelle part; GO:0043228 non-membrane-bounded organelle; GO:0044427 chromosomal part; GO:0005856 cytoskeleton; GO:0000793 condensed chromosome; GO:0031965 nuclear membrane; GO:0015630 …	GO:0005515 protein binding; GO:0017056 structural constituent of nuclear pore; GO:0005198 structural molecule activity; GO:0005488 binding;	K14304	NUP85; nuclear pore complex protein Nup85	hsa03013 RNA transport - Homo sapiens (human);
Q7Z417	Nuclear fragile X mental retardation-interacting protein 2 OS=Homo sapiens OX=9606 GN=NUFIP2 PE=1 SV=1	1.599	Up	0.0056608	NUFIP2	76.12	22.7	nucleus		GO:0016020 membrane; GO:0005737 cytoplasm; GO:0032991 macromolecular complex; GO:0044424 intracellular part; GO:0016604 nuclear body; GO:0005623 cell; GO:0044422 organelle part; GO:0036464 cytoplasmic ribonucleoprotein granule; GO:0043228 non-membrane-bounded organelle; GO:0031974 membrane-enclosed lumen; GO:0005654 nucleoplasm; GO:0070013 intracellular organelle lumen; GO:0044464 cell part; GO:0…	GO:0097159 organic cyclic compound binding; GO:1901363 heterocyclic compound binding; GO:0003723 RNA binding; GO:0005515 protein binding; GO:0005488 binding; GO:0003676 nucleic acid binding;
Q86SQ0	Pleckstrin homology-like domain family B member 2 OS=Homo sapiens OX=9606 GN=PHLDB2 PE=1 SV=2	8.832	Up	1.60892e-05	PHLDB2	142.16	1.8	nucleus	GO:0051093 negative regulation of developmental process; GO:1905331 negative regulation of morphogenesis of an epithelium; GO:0010717 regulation of epithelial to mesenchymal transition; GO:1903391 regulation of adherens junction organization; GO:0051129 negative regulation of cellular component organization; GO:0090109 regulation of cell-substrate junction assembly; GO:1904261 positive regulation…	GO:0043229 intracellular organelle; GO:0016020 membrane; GO:0031252 cell leading edge; GO:0005938 cell cortex; GO:0043232 intracellular non-membrane-bounded organelle; GO:0071944 cell periphery; GO:0045180 basal cortex; GO:0005737 cytoplasm; GO:0099568 cytoplasmic region; GO:0044424 intracellular part; GO:0005829 cytosol; GO:0005623 cell; GO:0005886 plasma membrane; GO:0043228 non-membrane-bounde…	GO:0050839 cell adhesion molecule binding; GO:0005515 protein binding; GO:0005488 binding; GO:0045296 cadherin binding;				IPR011993; IPR001849;	PH domain-like; Pleckstrin homology domain;
Q9ULV4	Coronin-1C OS=Homo sapiens OX=9606 GN=CORO1C PE=1 SV=1	0.471	Down	0.000137591	CORO1C	53.248	34.2	mitochondria	GO:0044700 single organism signaling; GO:0060491 regulation of cell projection assembly; GO:0010762 regulation of fibroblast migration; GO:0001755 neural crest cell migration; GO:0030036 actin cytoskeleton organization; GO:0032879 regulation of localization; GO:0044093 positive regulation of molecular function; GO:0008104 protein localization; GO:0044387 negative regulation of protein kinase acti…	GO:0016020 membrane; GO:0071944 cell periphery; GO:0098796 membrane protein complex; GO:0098857 membrane microdomain; GO:0030054 cell junction; GO:0005737 cytoplasm; GO:0032991 macromolecular complex; GO:0044424 intracellular part; GO:0005623 cell; GO:0043228 non-membrane-bounded organelle; GO:0005856 cytoskeleton; GO:0098590 plasma membrane region; GO:0005925 focal adhesion; GO:0044425 membrane …	GO:0031267 small GTPase binding; GO:0051015 actin filament binding; GO:0017048 Rho GTPase binding; GO:0048365 Rac GTPase binding; GO:0008092 cytoskeletal protein binding; GO:0017016 Ras GTPase binding; GO:0005488 binding; GO:0044877 macromolecular complex binding; GO:0003779 actin binding; GO:0005515 protein binding; GO:0051020 GTPase binding; GO:0019899 enzyme binding; GO:0032403 protein complex…	K13886	CORO1B_1C_6; coronin-1B/1C/6		IPR017986; IPR015943; IPR015048;	WD40-repeat-containing domain; WD40/YVTN repeat-like-containing domain; Domain of unknown function DUF1899;
Q53LP3	Ankyrin repeat domain-containing protein SOWAHC OS=Homo sapiens OX=9606 GN=SOWAHC PE=1 SV=1	2.091	Up	4.0115e-05	SOWAHC	55.671	3.4	nucleus			GO:0005515 protein binding; GO:0005488 binding;				IPR020683;	Ankyrin repeat-containing domain;
P07358	Complement component C8 beta chain OS=Homo sapiens OX=9606 GN=C8B PE=1 SV=3	12.471	Up	6.0511e-07	C8B	67.046	3.4	extracellular	GO:0030449 regulation of complement activation; GO:0016064 immunoglobulin mediated immune response; GO:0019835 cytolysis; GO:2000257 regulation of protein activation cascade; GO:0002252 immune effector process; GO:0060255 regulation of macromolecule metabolic process; GO:0002920 regulation of humoral immune response; GO:0002673 regulation of acute inflammatory response; GO:0006959 humoral immune …	GO:0016020 membrane; GO:0031226 intrinsic component of plasma membrane; GO:0005615 extracellular space; GO:0044421 extracellular region part; GO:0098796 membrane protein complex; GO:0071944 cell periphery; GO:0046930 pore complex; GO:0098797 plasma membrane protein complex; GO:0031982 vesicle; GO:0032991 macromolecular complex; GO:0031224 intrinsic component of membrane; GO:0005887 integral compo…	GO:0005515 protein binding; GO:0005488 binding; GO:0032403 protein complex binding; GO:0044877 macromolecular complex binding;	K03998	C8B; complement component 8 subunit beta	hsa04610 Complement and coagulation cascades - Homo sapiens (human); hsa05020 Prion diseases - Homo sapiens (human); hsa05146 Amoebiasis - Homo sapiens (human); hsa05322 Systemic lupus erythematosus - Homo sapiens (human);	IPR020864;	Membrane attack complex component/perforin (MACPF) domain;
Q9C0E2	Exportin-4 OS=Homo sapiens OX=9606 GN=XPO4 PE=1 SV=2	1.652	Up	0.00056069	XPO4	130.14	4.9	cytoplasm	GO:0046907 intracellular transport; GO:0090316 positive regulation of intracellular protein transport; GO:1903829 positive regulation of cellular protein localization; GO:0051169 nuclear transport; GO:0051168 nuclear export; GO:0015031 protein transport; GO:0070201 regulation of establishment of protein localization; GO:0051234 establishment of localization; GO:0060341 regulation of cellular loca…	GO:0043229 intracellular organelle; GO:0005643 nuclear pore; GO:0005635 nuclear envelope; GO:0005737 cytoplasm; GO:0031967 organelle envelope; GO:0044446 intracellular organelle part; GO:0032991 macromolecular complex; GO:0012505 endomembrane system; GO:0031981 nuclear lumen; GO:0044424 intracellular part; GO:0005829 cytosol; GO:0005623 cell; GO:0044422 organelle part; GO:0043226 organelle; GO:00…	GO:0031267 small GTPase binding; GO:0005487 nucleocytoplasmic transporter activity; GO:0008565 protein transporter activity; GO:0017016 Ras GTPase binding; GO:0005488 binding; GO:0022892 substrate-specific transporter activity; GO:0005515 protein binding; GO:0008536 Ran GTPase binding; GO:0005049 nuclear export signal receptor activity; GO:0051020 GTPase binding; GO:0019899 enzyme binding; GO:000…				IPR014877; IPR011989; IPR016024;	CRM1 C-terminal domain; Armadillo-like helical; Armadillo-type fold;
O95169	NADH dehydrogenase [ubiquinone] 1 beta subcomplex subunit 8, mitochondrial OS=Homo sapiens OX=9606 GN=NDUFB8 PE=1 SV=1	0.639	Down	0.022282	NDUFB8	21.766	21	mitochondria	GO:0044085 cellular component biogenesis; GO:0009116 nucleoside metabolic process; GO:0042278 purine nucleoside metabolic process; GO:0009167 purine ribonucleoside monophosphate metabolic process; GO:0009117 nucleotide metabolic process; GO:0044699 single-organism process; GO:0044237 cellular metabolic process; GO:0006796 phosphate-containing compound metabolic process; GO:0008152 metabolic proce…	GO:0016020 membrane; GO:0005783 endoplasmic reticulum; GO:0098800 inner mitochondrial membrane protein complex; GO:0031090 organelle membrane; GO:0098796 membrane protein complex; GO:0005737 cytoplasm; GO:0031224 intrinsic component of membrane; GO:0045271 respiratory chain complex I; GO:0032991 macromolecular complex; GO:0098798 mitochondrial protein complex; GO:0044424 intracellular part; GO:00…	GO:0016651 oxidoreductase activity, acting on NAD(P)H; GO:0003954 NADH dehydrogenase activity; GO:0003824 catalytic activity; GO:0050136 NADH dehydrogenase (quinone) activity; GO:0008137 NADH dehydrogenase (ubiquinone) activity; GO:0016655 oxidoreductase activity, acting on NAD(P)H, quinone or similar compound as acceptor; GO:0016491 oxidoreductase activity;	K03964	NDUFB8; NADH dehydrogenase (ubiquinone) 1 beta subcomplex subunit 8	hsa00190 Oxidative phosphorylation - Homo sapiens (human); hsa01100 Metabolic pathways - Homo sapiens (human); hsa04714 Thermogenesis - Homo sapiens (human); hsa04723 Retrograde endocannabinoid signaling - Homo sapiens (human); hsa04932 Non-alcoholic fatty liver disease (NAFLD) - Homo sapiens (human); hsa05010 Alzheimer disease - Homo sapiens (human); hsa05012 Parkinson disease - Homo sapiens (hu…
Q8TDB4	Protein MGARP OS=Homo sapiens OX=9606 GN=MGARP PE=1 SV=1	4.97	Up	0.0159233	MGARP	25.389	7.5	mitochondria	GO:0072594 establishment of protein localization to organelle; GO:0006839 mitochondrial transport; GO:0097211 cellular response to gonadotropin-releasing hormone; GO:0044699 single-organism process; GO:0008090 retrograde axonal transport; GO:0010821 regulation of mitochondrion organization; GO:0071383 cellular response to steroid hormone stimulus; GO:0015031 protein transport; GO:0051234 establis…	GO:0016020 membrane; GO:0019867 outer membrane; GO:0031090 organelle membrane; GO:0005737 cytoplasm; GO:0099568 cytoplasmic region; GO:0031306 intrinsic component of mitochondrial outer membrane; GO:0032838 cell projection cytoplasm; GO:0031224 intrinsic component of membrane; GO:0044424 intracellular part; GO:0044455 mitochondrial membrane part; GO:0005623 cell; GO:0044422 organelle part; GO:000…	GO:0005515 protein binding; GO:0005488 binding;				IPR032773;	Protein MGARP, N-terminal;
Q9NRY6	Phospholipid scramblase 3 OS=Homo sapiens OX=9606 GN=PLSCR3 PE=1 SV=2	2.279	Up	0.00021515	PLSCR3	31.648	13.2	cytoplasm	GO:0016043 cellular component organization; GO:0010256 endomembrane system organization; GO:0065008 regulation of biological quality; GO:0071222 cellular response to lipopolysaccharide; GO:0042593 glucose homeostasis; GO:0071310 cellular response to organic substance; GO:1901700 response to oxygen-containing compound; GO:0044699 single-organism process; GO:0097035 regulation of membrane lipid dis…	GO:0043229 intracellular organelle; GO:0016020 membrane; GO:0044429 mitochondrial part; GO:0031090 organelle membrane; GO:0071944 cell periphery; GO:0005737 cytoplasm; GO:0044446 intracellular organelle part; GO:0031967 organelle envelope; GO:0031224 intrinsic component of membrane; GO:0044424 intracellular part; GO:0005623 cell; GO:0016021 integral component of membrane; GO:0044422 organelle par…	GO:0005488 binding; GO:0043167 ion binding; GO:0005319 lipid transporter activity; GO:0043169 cation binding; GO:0046872 metal ion binding; GO:0022892 substrate-specific transporter activity; GO:0019904 protein domain specific binding; GO:0005515 protein binding; GO:0005509 calcium ion binding; GO:0017128 phospholipid scramblase activity; GO:0017124 SH3 domain binding; GO:0048306 calcium-dependen…
Q96EL2	28S ribosomal protein S24, mitochondrial OS=Homo sapiens OX=9606 GN=MRPS24 PE=1 SV=1	2.324	Up	0.0068202	MRPS24	19.015	10.2	mitochondria	GO:0016043 cellular component organization; GO:0006518 peptide metabolic process; GO:0044267 cellular protein metabolic process; GO:0044699 single-organism process; GO:0009058 biosynthetic process; GO:1901566 organonitrogen compound biosynthetic process; GO:0044237 cellular metabolic process; GO:0043241 protein complex disassembly; GO:0071704 organic substance metabolic process; GO:0008152 metabo…	GO:0016020 membrane; GO:0031090 organelle membrane; GO:0015935 small ribosomal subunit; GO:0005737 cytoplasm; GO:0032991 macromolecular complex; GO:0044424 intracellular part; GO:0005623 cell; GO:0000313 organellar ribosome; GO:0044422 organelle part; GO:0043228 non-membrane-bounded organelle; GO:0005740 mitochondrial envelope; GO:0031974 membrane-enclosed lumen; GO:0070013 intracellular organell…	GO:0097159 organic cyclic compound binding; GO:1901363 heterocyclic compound binding; GO:0003723 RNA binding; GO:0005488 binding; GO:0003676 nucleic acid binding; GO:0005198 structural molecule activity; GO:0003735 structural constituent of ribosome;	K17403	MRPS24; small subunit ribosomal protein S24
Q5T0F9	Coiled-coil and C2 domain-containing protein 1B OS=Homo sapiens OX=9606 GN=CC2D1B PE=1 SV=1	1.935	Up	0.026017	CC2D1B	94.223	12	nucleus	GO:0097659 nucleic acid-templated transcription; GO:0009058 biosynthetic process; GO:0051253 negative regulation of RNA metabolic process; GO:0044237 cellular metabolic process; GO:2001141 regulation of RNA biosynthetic process; GO:0008152 metabolic process; GO:0010558 negative regulation of macromolecule biosynthetic process; GO:0043170 macromolecule metabolic process; GO:1903507 negative regula…	GO:0031974 membrane-enclosed lumen; GO:0043231 intracellular membrane-bounded organelle; GO:0043226 organelle; GO:0043229 intracellular organelle; GO:0005634 nucleus; GO:0005654 nucleoplasm; GO:0070013 intracellular organelle lumen; GO:0044464 cell part; GO:0005622 intracellular; GO:0044446 intracellular organelle part; GO:0031981 nuclear lumen; GO:0044424 intracellular part; GO:0043227 membrane-…	GO:0003677 DNA binding; GO:0000981 RNA polymerase II transcription factor activity, sequence-specific DNA binding; GO:0000976 transcription regulatory region sequence-specific DNA binding; GO:0003690 double-stranded DNA binding; GO:1990837 sequence-specific double-stranded DNA binding; GO:0001012 RNA polymerase II regulatory region DNA binding; GO:0005515 protein binding; GO:0043565 sequence-spec…	K18260	CC2D1; coiled-coil and C2 domain-containing protein 1		IPR006608; IPR000008;	Domain of unknown function DM14; C2 domain;
P16104	Histone H2AX OS=Homo sapiens OX=9606 GN=H2AFX PE=1 SV=2	0.391	Down	0.032981	H2AFX	15.144	23.8	nucleus	GO:0044085 cellular component biogenesis; GO:0022414 reproductive process; GO:0007420 brain development; GO:0021987 cerebral cortex development; GO:0044237 cellular metabolic process; GO:0021537 telencephalon development; GO:0008152 metabolic process; GO:0006334 nucleosome assembly; GO:0065003 macromolecular complex assembly; GO:0044702 single organism reproductive process; GO:0010558 negative re…	GO:0044421 extracellular region part; GO:0031982 vesicle; GO:0000803 sex chromosome; GO:0032991 macromolecular complex; GO:0044424 intracellular part; GO:0016604 nuclear body; GO:0005623 cell; GO:0044422 organelle part; GO:0044427 chromosomal part; GO:0043228 non-membrane-bounded organelle; GO:0000793 condensed chromosome; GO:0031974 membrane-enclosed lumen; GO:0070062 extracellular exosome; GO:0…	GO:0042393 histone binding; GO:0097159 organic cyclic compound binding; GO:1901363 heterocyclic compound binding; GO:0003677 DNA binding; GO:0046982 protein heterodimerization activity; GO:0005488 binding; GO:0046983 protein dimerization activity; GO:0003676 nucleic acid binding; GO:0005515 protein binding; GO:0003684 damaged DNA binding; GO:0019899 enzyme binding;	K11251	H2A; histone H2A	hsa04217 Necroptosis - Homo sapiens (human); hsa05034 Alcoholism - Homo sapiens (human); hsa05322 Systemic lupus erythematosus - Homo sapiens (human);	IPR032454; IPR009072; IPR007125;	Histone H2A, C-terminal domain; Histone-fold; Histone H2A/H2B/H3;
Q9P2X0	Dolichol-phosphate mannosyltransferase subunit 3 OS=Homo sapiens OX=9606 GN=DPM3 PE=1 SV=2	3.19	Up	0.040177	DPM3	10.094	23.9	extracellular	GO:0043413 macromolecule glycosylation; GO:0065008 regulation of biological quality; GO:0046486 glycerolipid metabolic process; GO:0006643 membrane lipid metabolic process; GO:0008654 phospholipid biosynthetic process; GO:0044699 single-organism process; GO:0009058 biosynthetic process; GO:0044255 cellular lipid metabolic process; GO:0018196 peptidyl-asparagine modification; GO:0044237 cellular m…	GO:0043229 intracellular organelle; GO:0016020 membrane; GO:0031501 mannosyltransferase complex; GO:0042175 nuclear outer membrane-endoplasmic reticulum membrane network; GO:0005783 endoplasmic reticulum; GO:0044446 intracellular organelle part; GO:0005737 cytoplasm; GO:0031224 intrinsic component of membrane; GO:0012505 endomembrane system; GO:0032991 macromolecular complex; GO:0044424 intracell…	GO:0005515 protein binding; GO:0005488 binding;	K09659	DPM3; dolichyl-phosphate mannosyltransferase polypeptide 3	hsa00510 N-Glycan biosynthesis - Homo sapiens (human); hsa01100 Metabolic pathways - Homo sapiens (human);
P48060	Glioma pathogenesis-related protein 1 OS=Homo sapiens OX=9606 GN=GLIPR1 PE=1 SV=3	2.196	Up	0.013298	GLIPR1	30.366	11.7	extracellular	GO:0045321 leukocyte activation; GO:0002283 neutrophil activation involved in immune response; GO:0002252 immune effector process; GO:0044699 single-organism process; GO:0050896 response to stimulus; GO:0051234 establishment of localization; GO:1902578 single-organism localization; GO:0002275 myeloid cell activation involved in immune response; GO:0036230 granulocyte activation; GO:0009987 cellul…	GO:0016020 membrane; GO:0031090 organelle membrane; GO:0031410 cytoplasmic vesicle; GO:0071944 cell periphery; GO:0005737 cytoplasm; GO:0031982 vesicle; GO:0044433 cytoplasmic vesicle part; GO:0031224 intrinsic component of membrane; GO:0044424 intracellular part; GO:0005623 cell; GO:0044422 organelle part; GO:0005765 lysosomal membrane; GO:0005622 intracellular; GO:0044425 membrane part; GO:0044…					IPR034121; IPR014044;	Glioma pathogenesis-related protein 1-like, SCP domain; CAP domain;
Q15102	Platelet-activating factor acetylhydrolase IB subunit gamma OS=Homo sapiens OX=9606 GN=PAFAH1B3 PE=1 SV=1	1.711	Up	0.00054002	PAFAH1B3	25.734	19.9	extracellular	GO:0000003 reproduction; GO:0044707 single-multicellular organism process; GO:0022414 reproductive process; GO:0007420 brain development; GO:0044699 single-organism process; GO:0071704 organic substance metabolic process; GO:0008152 metabolic process; GO:0044702 single organism reproductive process; GO:0060322 head development; GO:0007275 multicellular organism development; GO:0006629 lipid metab…	GO:0016020 membrane; GO:0044421 extracellular region part; GO:0031982 vesicle; GO:0005737 cytoplasm; GO:0044424 intracellular part; GO:0005623 cell; GO:0005829 cytosol; GO:0005576 extracellular region; GO:0043226 organelle; GO:0070062 extracellular exosome; GO:0005622 intracellular; GO:0044464 cell part; GO:1903561 extracellular vesicle; GO:0043227 membrane-bounded organelle; GO:0043230 extracell…	GO:0003847 1-alkyl-2-acetylglycerophosphocholine esterase activity; GO:0052689 carboxylic ester hydrolase activity; GO:0046982 protein heterodimerization activity; GO:0046983 protein dimerization activity; GO:0016787 hydrolase activity; GO:0005515 protein binding; GO:0016298 lipase activity; GO:0016747 transferase activity, transferring acyl groups other than amino-acyl groups; GO:0016407 acetylt…	K16795	PAFAH1B2_3; platelet-activating factor acetylhydrolase IB subunit beta/gamma [EC:3.1.1.47]	hsa00565 Ether lipid metabolism - Homo sapiens (human); hsa01100 Metabolic pathways - Homo sapiens (human);	IPR013830;	SGNH hydrolase-type esterase domain;
Q8NA31	Telomere repeats-binding bouquet formation protein 1 OS=Homo sapiens OX=9606 GN=TERB1 PE=1 SV=3	15.006	Up	4.6307e-07	TERB1	83.063	1.2	nucleus	GO:0051640 organelle localization; GO:0000003 reproduction; GO:0016043 cellular component organization; GO:1903046 meiotic cell cycle process; GO:0022414 reproductive process; GO:0048285 organelle fission; GO:0097240 chromosome attachment to the nuclear envelope; GO:0044699 single-organism process; GO:0090220 chromosome localization to nuclear envelope involved in homologous chromosome segregatio…	GO:0016020 membrane; GO:0000784 nuclear chromosome, telomeric region; GO:0000781 chromosome, telomeric region; GO:0031090 organelle membrane; GO:0000782 telomere cap complex; GO:0032991 macromolecular complex; GO:0044424 intracellular part; GO:0005623 cell; GO:0044422 organelle part; GO:0044427 chromosomal part; GO:0043228 non-membrane-bounded organelle; GO:0031974 membrane-enclosed lumen; GO:003…	GO:0097159 organic cyclic compound binding; GO:1901363 heterocyclic compound binding; GO:0003677 DNA binding; GO:0005488 binding; GO:0003676 nucleic acid binding;				IPR001005; IPR009057; IPR011989; IPR016024;	SANT/Myb domain; Homeobox domain-like; Armadillo-like helical; Armadillo-type fold;
P21246	Pleiotrophin OS=Homo sapiens OX=9606 GN=PTN PE=1 SV=1	3.404	Up	0.00026084	PTN	18.942	25.6	extracellular	GO:0044700 single organism signaling; GO:0010941 regulation of cell death; GO:0048732 gland development; GO:0014013 regulation of gliogenesis; GO:1904398 positive regulation of neuromuscular junction development; GO:0022414 reproductive process; GO:0060042 retina morphogenesis in camera-type eye; GO:0030323 respiratory tube development; GO:0036119 response to platelet-derived growth factor; GO:00…	GO:0043229 intracellular organelle; GO:0016020 membrane; GO:0005783 endoplasmic reticulum; GO:0005615 extracellular space; GO:0044421 extracellular region part; GO:0031594 neuromuscular junction; GO:0005737 cytoplasm; GO:0012505 endomembrane system; GO:0044424 intracellular part; GO:0005623 cell; GO:0044420 extracellular matrix component; GO:0005576 extracellular region; GO:0045202 synapse; GO:00…	GO:0008083 growth factor activity; GO:0035374 chondroitin sulfate binding; GO:0038085 vascular endothelial growth factor binding; GO:0019838 growth factor binding; GO:0005102 receptor binding; GO:0019888 protein phosphatase regulator activity; GO:0043167 ion binding; GO:0043394 proteoglycan binding; GO:1904399 heparan sulfate binding; GO:0005515 protein binding; GO:0035373 chondroitin sulfate pro…	K16642	PTN; pleiotrophin		IPR020089; IPR020090; IPR020091;	Pleiotrophin/Midkine, N-terminal domain; Pleiotrophin/Midkine, C-terminal domain; Pleiotrophin/Midkine disulphide-rich domain;
Q13442	28 kDa heat- and acid-stable phosphoprotein OS=Homo sapiens OX=9606 GN=PDAP1 PE=1 SV=1	0.642	Down	0.00066124	PDAP1	20.63	37	nucleus	GO:0050794 regulation of cellular process; GO:0044700 single organism signaling; GO:0045321 leukocyte activation; GO:0002283 neutrophil activation involved in immune response; GO:0002252 immune effector process; GO:0044699 single-organism process; GO:0050896 response to stimulus; GO:0051234 establishment of localization; GO:0007165 signal transduction; GO:0002275 myeloid cell activation involved …	GO:0043229 intracellular organelle; GO:0097708 intracellular vesicle; GO:0031410 cytoplasmic vesicle; GO:0005737 cytoplasm; GO:0044446 intracellular organelle part; GO:0031982 vesicle; GO:0044433 cytoplasmic vesicle part; GO:0012505 endomembrane system; GO:0044424 intracellular part; GO:0005623 cell; GO:0005576 extracellular region; GO:1904813 ficolin-1-rich granule lumen; GO:0044422 organelle pa…	GO:0097159 organic cyclic compound binding; GO:1901363 heterocyclic compound binding; GO:0003723 RNA binding; GO:0005488 binding; GO:0003676 nucleic acid binding;				IPR019380;	Casein kinase substrate, phosphoprotein PP28;
Q7Z6I8	UPF0461 protein C5orf24 OS=Homo sapiens OX=9606 GN=C5orf24 PE=1 SV=1	3.619	Up	0.0079153	C5orf24	20.132	9	nucleus			GO:0005515 protein binding; GO:0005488 binding;
Q00688	Peptidyl-prolyl cis-trans isomerase FKBP3 OS=Homo sapiens OX=9606 GN=FKBP3 PE=1 SV=1	0.435	Down	8.1678e-05	FKBP3	25.177	25	cytoplasm	GO:0061077 chaperone-mediated protein folding; GO:0044267 cellular protein metabolic process; GO:0044238 primary metabolic process; GO:0018208 peptidyl-proline modification; GO:0000413 protein peptidyl-prolyl isomerization; GO:0044237 cellular metabolic process; GO:0071704 organic substance metabolic process; GO:0006457 protein folding; GO:0018193 peptidyl-amino acid modification; GO:0008152 meta…	GO:0043226 organelle; GO:0043231 intracellular membrane-bounded organelle; GO:0043229 intracellular organelle; GO:0005634 nucleus; GO:0044464 cell part; GO:0005622 intracellular; GO:0005737 cytoplasm; GO:0044424 intracellular part; GO:0043227 membrane-bounded organelle; GO:0005623 cell;	GO:0003723 RNA binding; GO:0003755 peptidyl-prolyl cis-trans isomerase activity; GO:0005515 protein binding; GO:0008144 drug binding; GO:1901363 heterocyclic compound binding; GO:0097159 organic cyclic compound binding; GO:0060089 molecular transducer activity; GO:0016853 isomerase activity; GO:0004872 receptor activity; GO:0003824 catalytic activity; GO:0005488 binding; GO:0003676 nucleic acid b…	K09570	FKBP3; FK506-binding protein 3 [EC:5.2.1.8]		IPR001179;	FKBP-type peptidyl-prolyl cis-trans isomerase domain;
P15882	N-chimaerin OS=Homo sapiens OX=9606 GN=CHN1 PE=1 SV=3	3.308	Up	0.0009034	CHN1	53.172	3.1	cytoplasm	GO:0044700 single organism signaling; GO:0007166 cell surface receptor signaling pathway; GO:0023051 regulation of signaling; GO:0048666 neuron development; GO:0048869 cellular developmental process; GO:0032989 cellular component morphogenesis; GO:0022008 neurogenesis; GO:0044699 single-organism process; GO:0009605 response to external stimulus; GO:0007165 signal transduction; GO:0010646 regulati…	GO:0044464 cell part; GO:0005622 intracellular; GO:0005737 cytoplasm; GO:0044424 intracellular part; GO:0005623 cell; GO:0005829 cytosol; GO:0044444 cytoplasmic part;	GO:0030674 protein binding, bridging; GO:0005102 receptor binding; GO:0060589 nucleoside-triphosphatase regulator activity; GO:0030695 GTPase regulator activity; GO:0043167 ion binding; GO:0005515 protein binding; GO:0046875 ephrin receptor binding; GO:0098772 molecular function regulator; GO:0005070 SH3/SH2 adaptor activity; GO:0035591 signaling adaptor activity; GO:0030234 enzyme regulator acti…	K20630	CHN1_2, ARHGAP2_3; chimaerin		IPR002219; IPR000980; IPR020454; IPR008936; IPR000198;	Protein kinase C-like, phorbol ester/diacylglycerol-binding domain; SH2 domain; Diacylglycerol/phorbol-ester binding; Rho GTPase activation protein; Rho GTPase-activating protein domain;
Q12788	Transducin beta-like protein 3 OS=Homo sapiens OX=9606 GN=TBL3 PE=1 SV=2	3.369	Up	0.000104297	TBL3	89.034	8.5	cytoplasm	GO:0016072 rRNA metabolic process; GO:0006396 RNA processing; GO:0034470 ncRNA processing; GO:0044085 cellular component biogenesis; GO:0022613 ribonucleoprotein complex biogenesis; GO:0006725 cellular aromatic compound metabolic process; GO:0042274 ribosomal small subunit biogenesis; GO:0006807 nitrogen compound metabolic process; GO:0042254 ribosome biogenesis; GO:1901360 organic cyclic compoun…	GO:0034388 Pwp2p-containing subcomplex of 90S preribosome; GO:0043229 intracellular organelle; GO:0043232 intracellular non-membrane-bounded organelle; GO:0044446 intracellular organelle part; GO:0031981 nuclear lumen; GO:0032991 macromolecular complex; GO:0044424 intracellular part; GO:0044452 nucleolar part; GO:0005730 nucleolus; GO:0005623 cell; GO:0044422 organelle part; GO:0043228 non-membra…	GO:0030515 snoRNA binding; GO:0097159 organic cyclic compound binding; GO:1901363 heterocyclic compound binding; GO:0003723 RNA binding; GO:0005515 protein binding; GO:0005488 binding; GO:0003676 nucleic acid binding;	K14555	UTP13, TBL3; U3 small nucleolar RNA-associated protein 13	hsa03008 Ribosome biogenesis in eukaryotes - Homo sapiens (human);	IPR017986; IPR015943; IPR011044; IPR013934;	WD40-repeat-containing domain; WD40/YVTN repeat-like-containing domain; Quinoprotein amine dehydrogenase, beta chain-like; Small-subunit processome, Utp13;
O00299	Chloride intracellular channel protein 1 OS=Homo sapiens OX=9606 GN=CLIC1 PE=1 SV=4	0.644	Down	0.00063537	CLIC1	26.922	72.2	cytoplasm	GO:0044700 single organism signaling; GO:0098661 inorganic anion transmembrane transport; GO:0065008 regulation of biological quality; GO:0007596 blood coagulation; GO:0044699 single-organism process; GO:0051234 establishment of localization; GO:0009611 response to wounding; GO:0022610 biological adhesion; GO:0016337 single organismal cell-cell adhesion; GO:0007165 signal transduction; GO:0007154…	GO:0016020 membrane; GO:0098862 cluster of actin-based cell projections; GO:0005615 extracellular space; GO:0044421 extracellular region part; GO:0005903 brush border; GO:0031090 organelle membrane; GO:0071944 cell periphery; GO:0005737 cytoplasm; GO:0031982 vesicle; GO:0032991 macromolecular complex; GO:0031224 intrinsic component of membrane; GO:0044424 intracellular part; GO:0005623 cell; GO:0…	GO:0015075 ion transmembrane transporter activity; GO:0022803 passive transmembrane transporter activity; GO:0005253 anion channel activity; GO:0022892 substrate-specific transporter activity; GO:0005515 protein binding; GO:0005254 chloride channel activity; GO:0015267 channel activity; GO:0015103 inorganic anion transmembrane transporter activity; GO:0022891 substrate-specific transmembrane tran…	K05021	CLIC1; chloride intracellular channel protein 1		IPR010987; IPR012336; IPR004045;	Glutathione S-transferase, C-terminal-like; Thioredoxin-like fold; Glutathione S-transferase, N-terminal;
Q9HAU4	E3 ubiquitin-protein ligase SMURF2 OS=Homo sapiens OX=9606 GN=SMURF2 PE=1 SV=1	2.076	Up	0.00027645	SMURF2	86.195	16.6	mitochondria	GO:0044700 single organism signaling; GO:0030335 positive regulation of cell migration; GO:0007166 cell surface receptor signaling pathway; GO:1903845 negative regulation of cellular response to transforming growth factor beta stimulus; GO:0044237 cellular metabolic process; GO:0008152 metabolic process; GO:0030509 BMP signaling pathway; GO:0007178 transmembrane receptor protein serine/threonine …	GO:0016020 membrane; GO:0098857 membrane microdomain; GO:0071944 cell periphery; GO:0005737 cytoplasm; GO:0032991 macromolecular complex; GO:0044424 intracellular part; GO:0016604 nuclear body; GO:0005623 cell; GO:0044422 organelle part; GO:0031974 membrane-enclosed lumen; GO:1902494 catalytic complex; GO:0005654 nucleoplasm; GO:0070013 intracellular organelle lumen; GO:0044425 membrane part; GO:…	GO:0061630 ubiquitin protein ligase activity; GO:0042802 identical protein binding; GO:0019787 ubiquitin-like protein transferase activity; GO:0003824 catalytic activity; GO:0005102 receptor binding; GO:0005160 transforming growth factor beta receptor binding; GO:0005488 binding; GO:0004842 ubiquitin-protein transferase activity; GO:0005126 cytokine receptor binding; GO:0005515 protein binding; G…	K04678	SMURF; E3 ubiquitin ligase SMURF1/2 [EC:2.3.2.26]	hsa04120 Ubiquitin mediated proteolysis - Homo sapiens (human); hsa04144 Endocytosis - Homo sapiens (human); hsa04340 Hedgehog signaling pathway - Homo sapiens (human); hsa04350 TGF-beta signaling pathway - Homo sapiens (human);	IPR001202; IPR000569; IPR000008;	WW domain; HECT domain; C2 domain;
Q9HBI1	Beta-parvin OS=Homo sapiens OX=9606 GN=PARVB PE=1 SV=1	2.558	Up	3.8257e-05	PARVB	41.714	8.8	mitochondria	GO:0030032 lamellipodium assembly; GO:0044085 cellular component biogenesis; GO:0071963 establishment or maintenance of cell polarity regulating cell shape; GO:0050794 regulation of cellular process; GO:0016043 cellular component organization; GO:0097581 lamellipodium organization; GO:0065008 regulation of biological quality; GO:0044763 single-organism cellular process; GO:0044699 single-organism…	GO:0016020 membrane; GO:0071944 cell periphery; GO:0030054 cell junction; GO:0030016 myofibril; GO:0005737 cytoplasm; GO:0099512 supramolecular fiber; GO:0044424 intracellular part; GO:0030018 Z disc; GO:0099080 supramolecular complex; GO:0005623 cell; GO:0031674 I band; GO:0044422 organelle part; GO:0043228 non-membrane-bounded organelle; GO:0005856 cytoskeleton; GO:0005925 focal adhesion; GO:00…	GO:0003779 actin binding; GO:0005515 protein binding; GO:0008092 cytoskeletal protein binding; GO:0005488 binding;	K06275	PARV; parvin	hsa04510 Focal adhesion - Homo sapiens (human);	IPR001715;	Calponin homology domain;
A6NHL2	Tubulin alpha chain-like 3 OS=Homo sapiens OX=9606 GN=TUBAL3 PE=1 SV=2	0.491	Down	0.001996	TUBAL3	49.908	11.7	cytoskeleton	GO:0016043 cellular component organization; GO:0007010 cytoskeleton organization; GO:0007017 microtubule-based process; GO:0009987 cellular process; GO:0006996 organelle organization; GO:0071840 cellular component organization or biogenesis;	GO:0043229 intracellular organelle; GO:0099513 polymeric cytoskeletal fiber; GO:0005874 microtubule; GO:0043232 intracellular non-membrane-bounded organelle; GO:0044430 cytoskeletal part; GO:0005737 cytoplasm; GO:0044446 intracellular organelle part; GO:0099512 supramolecular fiber; GO:0044424 intracellular part; GO:0099080 supramolecular complex; GO:0005623 cell; GO:0044422 organelle part; GO:00…	GO:1901265 nucleoside phosphate binding; GO:0001882 nucleoside binding; GO:0043167 ion binding; GO:0016817 hydrolase activity, acting on acid anhydrides; GO:0016787 hydrolase activity; GO:0000166 nucleotide binding; GO:0017111 nucleoside-triphosphatase activity; GO:1901363 heterocyclic compound binding; GO:0097159 organic cyclic compound binding; GO:0032549 ribonucleoside binding; GO:0097367 carb…	K07374	TUBA; tubulin alpha	hsa04145 Phagosome - Homo sapiens (human); hsa04210 Apoptosis - Homo sapiens (human); hsa04530 Tight junction - Homo sapiens (human); hsa04540 Gap junction - Homo sapiens (human); hsa05130 Pathogenic Escherichia coli infection - Homo sapiens (human);	IPR003008; IPR023123; IPR008280; IPR018316;	Tubulin/FtsZ, GTPase domain; Tubulin, C-terminal; Tubulin/FtsZ, C-terminal; Tubulin/FtsZ, 2-layer sandwich domain;
P68400	Casein kinase II subunit alpha OS=Homo sapiens OX=9606 GN=CSNK2A1 PE=1 SV=1	1.701	Up	4.2239e-05	CSNK2A1	45.143	41.2	nucleus	GO:0044700 single organism signaling; GO:0010941 regulation of cell death; GO:0007166 cell surface receptor signaling pathway; GO:0097659 nucleic acid-templated transcription; GO:0044255 cellular lipid metabolic process; GO:0010564 regulation of cell cycle process; GO:0044237 cellular metabolic process; GO:1902100 negative regulation of metaphase/anaphase transition of cell cycle; GO:0045927 posi…	GO:0016020 membrane; GO:0071944 cell periphery; GO:0005737 cytoplasm; GO:0032991 macromolecular complex; GO:0017053 transcriptional repressor complex; GO:0044424 intracellular part; GO:0070603 SWI/SNF superfamily-type complex; GO:0005623 cell; GO:0000118 histone deacetylase complex; GO:0044422 organelle part; GO:0090568 nuclear transcriptional repressor complex; GO:0044427 chromosomal part; GO:00…	GO:1901265 nucleoside phosphate binding; GO:0047485 protein N-terminus binding; GO:0016773 phosphotransferase activity, alcohol group as acceptor; GO:0005515 protein binding; GO:0004672 protein kinase activity; GO:0097159 organic cyclic compound binding; GO:1901363 heterocyclic compound binding; GO:0016301 kinase activity; GO:0032553 ribonucleotide binding; GO:0003824 catalytic activity; GO:00054…	K03097	CSNK2A; casein kinase II subunit alpha [EC:2.7.11.1]	hsa03008 Ribosome biogenesis in eukaryotes - Homo sapiens (human); hsa04064 NF-kappa B signaling pathway - Homo sapiens (human); hsa04137 Mitophagy - animal - Homo sapiens (human); hsa04310 Wnt signaling pathway - Homo sapiens (human); hsa04520 Adherens junction - Homo sapiens (human); hsa05162 Measles - Homo sapiens (human);	IPR000719; IPR011009;	Protein kinase domain; Protein kinase-like domain;
P63272	Transcription elongation factor SPT4 OS=Homo sapiens OX=9606 GN=SUPT4H1 PE=1 SV=1	2.817	Up	0.00169635	SUPT4H1	13.193	17.1	extracellular	GO:0034244 negative regulation of transcription elongation from RNA polymerase II promoter; GO:0097659 nucleic acid-templated transcription; GO:0009891 positive regulation of biosynthetic process; GO:0009058 biosynthetic process; GO:0006354 DNA-templated transcription, elongation; GO:0044237 cellular metabolic process; GO:0051253 negative regulation of RNA metabolic process; GO:2001141 regulation…	GO:0043229 intracellular organelle; GO:0044446 intracellular organelle part; GO:0031981 nuclear lumen; GO:0032991 macromolecular complex; GO:0044424 intracellular part; GO:0005623 cell; GO:0044422 organelle part; GO:0031974 membrane-enclosed lumen; GO:0043231 intracellular membrane-bounded organelle; GO:0032044 DSIF complex; GO:0043226 organelle; GO:0005654 nucleoplasm; GO:0005634 nucleus; GO:007…	GO:0003723 RNA binding; GO:0001099 basal RNA polymerase II transcription machinery binding; GO:0046982 protein heterodimerization activity; GO:0043167 ion binding; GO:0000993 RNA polymerase II core binding; GO:0044877 macromolecular complex binding; GO:0046983 protein dimerization activity; GO:0005515 protein binding; GO:0070063 RNA polymerase binding; GO:0008270 zinc ion binding; GO:0003700 tran…	K15171	SUPT4H1, SPT4; transcription elongation factor SPT4		IPR022800; IPR029040;	Spt4/RpoE2 zinc finger; RNA polymerase subunit RPABC4/transcription elongation factor Spt4;
Q9Y5K6	CD2-associated protein OS=Homo sapiens OX=9606 GN=CD2AP PE=1 SV=1	1.61	Up	0.040538	CD2AP	71.45	14.4	nucleus	GO:0060627 regulation of vesicle-mediated transport; GO:0044085 cellular component biogenesis; GO:0044700 single organism signaling; GO:0051674 localization of cell; GO:0007067 mitotic nuclear division; GO:0051241 negative regulation of multicellular organismal process; GO:0044699 single-organism process; GO:0032911 negative regulation of transforming growth factor beta1 production; GO:0001818 ne…	GO:0016020 membrane; GO:0044421 extracellular region part; GO:0031410 cytoplasmic vesicle; GO:0071944 cell periphery; GO:0030054 cell junction; GO:0031982 vesicle; GO:0005737 cytoplasm; GO:0032991 macromolecular complex; GO:0099512 supramolecular fiber; GO:0044424 intracellular part; GO:0099080 supramolecular complex; GO:0005623 cell; GO:0005911 cell-cell junction; GO:0044422 organelle part; GO:0…	GO:0005102 receptor binding; GO:0044877 macromolecular complex binding; GO:0005126 cytokine receptor binding; GO:0070851 growth factor receptor binding; GO:0005515 protein binding; GO:0005172 vascular endothelial growth factor receptor binding; GO:0017124 SH3 domain binding; GO:0050839 cell adhesion molecule binding; GO:0005200 structural constituent of cytoskeleton; GO:0005488 binding; GO:004529…	K13738	CD2AP; CD2-associated protein	hsa05100 Bacterial invasion of epithelial cells - Homo sapiens (human);	IPR001452;	SH3 domain;
Q13363	C-terminal-binding protein 1 OS=Homo sapiens OX=9606 GN=CTBP1 PE=1 SV=2	2.256	Up	0.00049653	CTBP1	47.535	14.8	mitochondria	GO:0019079 viral genome replication; GO:0032270 positive regulation of cellular protein metabolic process; GO:0097659 nucleic acid-templated transcription; GO:0044237 cellular metabolic process; GO:0008285 negative regulation of cell proliferation; GO:1905269 positive regulation of chromatin organization; GO:0008152 metabolic process; GO:0043170 macromolecule metabolic process; GO:0019538 protein…	GO:0043229 intracellular organelle; GO:0044446 intracellular organelle part; GO:0005737 cytoplasm; GO:0031981 nuclear lumen; GO:0032991 macromolecular complex; GO:0044424 intracellular part; GO:0017053 transcriptional repressor complex; GO:0005667 transcription factor complex; GO:0005623 cell; GO:0044422 organelle part; GO:0043226 organelle; GO:0043231 intracellular membrane-bounded organelle; GO…	GO:0003714 transcription corepressor activity; GO:1901265 nucleoside phosphate binding; GO:0005515 protein binding; GO:0000166 nucleotide binding; GO:0003712 transcription cofactor activity; GO:0048037 cofactor binding; GO:0003700 transcription factor activity, sequence-specific DNA binding; GO:0016491 oxidoreductase activity; GO:0097159 organic cyclic compound binding; GO:1901363 heterocyclic co…	K04496	CTBP; C-terminal binding protein	hsa04310 Wnt signaling pathway - Homo sapiens (human); hsa04330 Notch signaling pathway - Homo sapiens (human); hsa05200 Pathways in cancer - Homo sapiens (human); hsa05220 Chronic myeloid leukemia - Homo sapiens (human);	IPR006139; IPR006140; IPR016040;	D-isomer specific 2-hydroxyacid dehydrogenase, catalytic domain; D-isomer specific 2-hydroxyacid dehydrogenase, NAD-binding domain; NAD(P)-binding domain;
P07910	Heterogeneous nuclear ribonucleoproteins C1/C2 OS=Homo sapiens OX=9606 GN=HNRNPC PE=1 SV=4	0.616	Down	0.00082329	HNRNPC	33.67	42.2	nucleus	GO:0001649 osteoblast differentiation; GO:0065008 regulation of biological quality; GO:0010608 posttranscriptional regulation of gene expression; GO:0043489 RNA stabilization; GO:0051129 negative regulation of cellular component organization; GO:0048869 cellular developmental process; GO:0044699 single-organism process; GO:0044237 cellular metabolic process; GO:0032204 regulation of telomere main…	GO:0016020 membrane; GO:0044421 extracellular region part; GO:0031982 vesicle; GO:0005737 cytoplasm; GO:0032991 macromolecular complex; GO:0044424 intracellular part; GO:0005623 cell; GO:0044422 organelle part; GO:0044427 chromosomal part; GO:0043228 non-membrane-bounded organelle; GO:0031974 membrane-enclosed lumen; GO:0070062 extracellular exosome; GO:1902494 catalytic complex; GO:0005654 nucle…	GO:1901265 nucleoside phosphate binding; GO:0031490 chromatin DNA binding; GO:0001158 enhancer sequence-specific DNA binding; GO:0003690 double-stranded DNA binding; GO:0005515 protein binding; GO:0003682 chromatin binding; GO:0035326 enhancer binding; GO:0000987 core promoter proximal region sequence-specific DNA binding; GO:0000975 regulatory region DNA binding; GO:1901363 heterocyclic compound…	K12884	HNRNPC; heterogeneous nuclear ribonucleoprotein C1/C2	hsa03040 Spliceosome - Homo sapiens (human);	IPR000504; IPR012677;	RNA recognition motif domain; Nucleotide-binding alpha-beta plait domain;
Q6ZS17	Rho family-interacting cell polarization regulator 1 OS=Homo sapiens OX=9606 GN=RIPOR1 PE=1 SV=1	1.972	Up	0.003483	RIPOR1	132.31	8.1	nucleus		GO:0070062 extracellular exosome; GO:0043226 organelle; GO:0044421 extracellular region part; GO:0044464 cell part; GO:0005622 intracellular; GO:0005737 cytoplasm; GO:0031982 vesicle; GO:1903561 extracellular vesicle; GO:0044424 intracellular part; GO:0005623 cell; GO:0043227 membrane-bounded organelle; GO:0005576 extracellular region; GO:0043230 extracellular organelle;	GO:0005488 binding;				IPR011989; IPR016024; IPR031780;	Armadillo-like helical; Armadillo-type fold; FAM65, N-terminal;
Q9P2E3	NFX1-type zinc finger-containing protein 1 OS=Homo sapiens OX=9606 GN=ZNFX1 PE=2 SV=2	4.192	Up	0.0020771	ZNFX1	220.22	1.7	cytoplasm,nucleus	GO:0050794 regulation of cellular process; GO:0010468 regulation of gene expression; GO:0006355 regulation of transcription, DNA-templated; GO:0031326 regulation of cellular biosynthetic process; GO:0080090 regulation of primary metabolic process; GO:0060255 regulation of macromolecule metabolic process; GO:0019219 regulation of nucleobase-containing compound metabolic process; GO:0010556 regulat…	GO:0043226 organelle; GO:0043231 intracellular membrane-bounded organelle; GO:0043229 intracellular organelle; GO:0005634 nucleus; GO:0044464 cell part; GO:0005622 intracellular; GO:0044424 intracellular part; GO:0043227 membrane-bounded organelle; GO:0005623 cell;	GO:0097159 organic cyclic compound binding; GO:1901363 heterocyclic compound binding; GO:0003723 RNA binding; GO:0046914 transition metal ion binding; GO:0005488 binding; GO:0001071 nucleic acid binding transcription factor activity; GO:0003676 nucleic acid binding; GO:0043167 ion binding; GO:0043169 cation binding; GO:0046872 metal ion binding; GO:0008270 zinc ion binding; GO:0003700 transcripti…				IPR000967; IPR027417; IPR016024;	Zinc finger, NF-X1-type; P-loop containing nucleoside triphosphate hydrolase; Armadillo-type fold;
Q86YN1	Dolichyldiphosphatase 1 OS=Homo sapiens OX=9606 GN=DOLPP1 PE=2 SV=1	1.659	Up	0.041305	DOLPP1	27.03	8	plasma membrane	GO:0043413 macromolecule glycosylation; GO:0008654 phospholipid biosynthetic process; GO:0044267 cellular protein metabolic process; GO:0044699 single-organism process; GO:0044255 cellular lipid metabolic process; GO:0009058 biosynthetic process; GO:0006489 dolichyl diphosphate biosynthetic process; GO:0044237 cellular metabolic process; GO:0006796 phosphate-containing compound metabolic process;…	GO:0043229 intracellular organelle; GO:0016020 membrane; GO:0042175 nuclear outer membrane-endoplasmic reticulum membrane network; GO:0005783 endoplasmic reticulum; GO:0044446 intracellular organelle part; GO:0005737 cytoplasm; GO:0031224 intrinsic component of membrane; GO:0012505 endomembrane system; GO:0044424 intracellular part; GO:0005623 cell; GO:0016021 integral component of membrane; GO:0…	GO:0047874 dolichyldiphosphatase activity; GO:0016817 hydrolase activity, acting on acid anhydrides; GO:0016787 hydrolase activity; GO:0016462 pyrophosphatase activity; GO:0016818 hydrolase activity, acting on acid anhydrides, in phosphorus-containing anhydrides; GO:0003824 catalytic activity;	K07252	E3.6.1.43; dolichyldiphosphatase [EC:3.6.1.43]	hsa00510 N-Glycan biosynthesis - Homo sapiens (human);	IPR000326;	Phosphatidic acid phosphatase type 2/haloperoxidase;
O95248	Myotubularin-related protein 5 OS=Homo sapiens OX=9606 GN=SBF1 PE=1 SV=4	1.985	Up	0.0004247	SBF1	208.44	4	nucleus	GO:0000003 reproduction; GO:0016043 cellular component organization; GO:0022414 reproductive process; GO:0044267 cellular protein metabolic process; GO:0044699 single-organism process; GO:0044237 cellular metabolic process; GO:0006796 phosphate-containing compound metabolic process; GO:0071704 organic substance metabolic process; GO:0008152 metabolic process; GO:0051345 positive regulation of hyd…	GO:0016020 membrane; GO:0043229 intracellular organelle; GO:0005737 cytoplasm; GO:0031224 intrinsic component of membrane; GO:0044424 intracellular part; GO:0005829 cytosol; GO:0005623 cell; GO:0016021 integral component of membrane; GO:0043231 intracellular membrane-bounded organelle; GO:0043226 organelle; GO:0005634 nucleus; GO:0005622 intracellular; GO:0044464 cell part; GO:0044425 membrane pa…	GO:0030234 enzyme regulator activity; GO:0003824 catalytic activity; GO:0042578 phosphoric ester hydrolase activity; GO:0017112 Rab guanyl-nucleotide exchange factor activity; GO:0005085 guanyl-nucleotide exchange factor activity; GO:0016791 phosphatase activity; GO:0019208 phosphatase regulator activity; GO:0016788 hydrolase activity, acting on ester bonds; GO:0016787 hydrolase activity; GO:0005…	K18061	SBF1_2, MTMR5_13; myotubularin-related protein 5/13		IPR022096; IPR005112; IPR010569; IPR001849; IPR005113; IPR029021; IPR001194; IPR011993; IPR004182;	SBF1/SBF2 domain; dDENN domain; Myotubularin-like phosphatase domain; Pleckstrin homology domain; uDENN domain; Protein-tyrosine phosphatase-like; DENN domain; PH domain-like; GRAM domain;
O95445	Apolipoprotein M OS=Homo sapiens OX=9606 GN=APOM PE=1 SV=2	28.008	Up	2.2509e-08	APOM	21.253	4.3	extracellular	GO:0034367 macromolecular complex remodeling; GO:0044085 cellular component biogenesis; GO:0065008 regulation of biological quality; GO:0015850 organic hydroxy compound transport; GO:0009746 response to hexose; GO:0033344 cholesterol efflux; GO:0030301 cholesterol transport; GO:0044699 single-organism process; GO:0044255 cellular lipid metabolic process; GO:0034442 regulation of lipoprotein oxida…	GO:0016020 membrane; GO:0031226 intrinsic component of plasma membrane; GO:0005615 extracellular space; GO:0044421 extracellular region part; GO:0071944 cell periphery; GO:0034362 low-density lipoprotein particle; GO:0031982 vesicle; GO:0034358 plasma lipoprotein particle; GO:0034385 triglyceride-rich plasma lipoprotein particle; GO:0031224 intrinsic component of membrane; GO:0032991 macromolecul…	GO:0005488 binding; GO:0005543 phospholipid binding; GO:0043167 ion binding; GO:0016209 antioxidant activity; GO:0005319 lipid transporter activity; GO:0008289 lipid binding; GO:0022892 substrate-specific transporter activity; GO:0043168 anion binding; GO:0005215 transporter activity;				IPR011038;	Calycin-like;
O14786	Neuropilin-1 OS=Homo sapiens OX=9606 GN=NRP1 PE=1 SV=3	1.527	Up	0.0034806	NRP1	103.13	17.4	endoplasmic reticulum	GO:0044700 single organism signaling; GO:0060839 endothelial cell fate commitment; GO:0010941 regulation of cell death; GO:0090130 tissue migration; GO:0048008 platelet-derived growth factor receptor signaling pathway; GO:0048732 gland development; GO:0035282 segmentation; GO:0043523 regulation of neuron apoptotic process; GO:0010594 regulation of endothelial cell migration; GO:0048754 branching …	GO:0016020 membrane; GO:0005615 extracellular space; GO:0044421 extracellular region part; GO:0031410 cytoplasmic vesicle; GO:0071944 cell periphery; GO:0030054 cell junction; GO:0005737 cytoplasm; GO:0031982 vesicle; GO:0043025 neuronal cell body; GO:0031224 intrinsic component of membrane; GO:0032991 macromolecular complex; GO:0099512 supramolecular fiber; GO:0030426 growth cone; GO:0044424 int…	GO:0016773 phosphotransferase activity, alcohol group as acceptor; GO:0019838 growth factor binding; GO:0015026 coreceptor activity; GO:0017154 semaphorin receptor activity; GO:0004713 protein tyrosine kinase activity; GO:0005515 protein binding; GO:0004672 protein kinase activity; GO:0004888 transmembrane signaling receptor activity; GO:0008201 heparin binding; GO:0004871 signal transducer activ…	K06724	NRP1, CD304; neuropilin 1	hsa04360 Axon guidance - Homo sapiens (human); hsa05166 Human T-cell leukemia virus 1 infection - Homo sapiens (human);	IPR000421; IPR000859; IPR000998; IPR013320; IPR022579; IPR008979;	Coagulation factor 5/8 C-terminal domain; CUB domain; MAM domain; Concanavalin A-like lectin/glucanase domain; Neuropilin, C-terminal; Galactose-binding domain-like;
P55196	Afadin OS=Homo sapiens OX=9606 GN=AFDN PE=1 SV=3	1.736	Up	0.00024246	AFDN	206.8	3.8	nucleus	GO:0050794 regulation of cellular process; GO:0044700 single organism signaling; GO:0016043 cellular component organization; GO:0048869 cellular developmental process; GO:0045216 cell-cell junction organization; GO:0044699 single-organism process; GO:0050896 response to stimulus; GO:0045446 endothelial cell differentiation; GO:0048468 cell development; GO:0022610 biological adhesion; GO:0007165 s…	GO:0043229 intracellular organelle; GO:0016020 membrane; GO:0071944 cell periphery; GO:0030054 cell junction; GO:0044446 intracellular organelle part; GO:0005737 cytoplasm; GO:0070161 anchoring junction; GO:0031981 nuclear lumen; GO:0044424 intracellular part; GO:0016604 nuclear body; GO:0005911 cell-cell junction; GO:0005829 cytosol; GO:0005623 cell; GO:0044422 organelle part; GO:0005886 plasma …	GO:0031267 small GTPase binding; GO:0050839 cell adhesion molecule binding; GO:0017016 Ras GTPase binding; GO:0005488 binding; GO:0045296 cadherin binding; GO:0005515 protein binding; GO:0008022 protein C-terminus binding; GO:0051020 GTPase binding; GO:0019899 enzyme binding;	K05702	AF6, MLLT4; afadin	hsa04014 Ras signaling pathway - Homo sapiens (human); hsa04015 Rap1 signaling pathway - Homo sapiens (human); hsa04024 cAMP signaling pathway - Homo sapiens (human); hsa04520 Adherens junction - Homo sapiens (human); hsa04530 Tight junction - Homo sapiens (human); hsa04670 Leukocyte transendothelial migration - Homo sapiens (human);	IPR002710; IPR008984; IPR029071; IPR001478; IPR000253; IPR000159;	Dilute domain; SMAD/FHA domain; Ubiquitin-related domain; PDZ domain; Forkhead-associated (FHA) domain; Ras-associating (RA) domain;
P01137	Transforming growth factor beta-1 proprotein OS=Homo sapiens OX=9606 GN=TGFB1 PE=1 SV=2	2.827	Up	1.4564e-06	TGFB1	44.341	4.6	extracellular	GO:0044700 single organism signaling; GO:0002694 regulation of leukocyte activation; GO:0071384 cellular response to corticosteroid stimulus; GO:0010564 regulation of cell cycle process; GO:0044237 cellular metabolic process; GO:0001558 regulation of cell growth; GO:0007492 endoderm development; GO:0009814 defense response, incompatible interaction; GO:0019693 ribose phosphate metabolic process; …	GO:0034774 secretory granule lumen; GO:0016020 membrane; GO:0005615 extracellular space; GO:0044421 extracellular region part; GO:0031410 cytoplasmic vesicle; GO:0071944 cell periphery; GO:0031982 vesicle; GO:0005737 cytoplasm; GO:0043025 neuronal cell body; GO:0044433 cytoplasmic vesicle part; GO:0044424 intracellular part; GO:0005623 cell; GO:0044422 organelle part; GO:0031974 membrane-enclosed…	GO:0008083 growth factor activity; GO:0047485 protein N-terminus binding; GO:0043539 protein serine/threonine kinase activator activity; GO:0030295 protein kinase activator activity; GO:0046982 protein heterodimerization activity; GO:0005102 receptor binding; GO:0005160 transforming growth factor beta receptor binding; GO:0005126 cytokine receptor binding; GO:0046983 protein dimerization activity…	K13375	TGFB1; transforming growth factor beta-1	hsa04010 MAPK signaling pathway - Homo sapiens (human); hsa04060 Cytokine-cytokine receptor interaction - Homo sapiens (human); hsa04068 FoxO signaling pathway - Homo sapiens (human); hsa04110 Cell cycle - Homo sapiens (human); hsa04218 Cellular senescence - Homo sapiens (human); hsa04350 TGF-beta signaling pathway - Homo sapiens (human); hsa04380 Osteoclast differentiation - Homo sapiens (human)…	IPR001111; IPR001839; IPR029034;	Transforming growth factor-beta, N-terminal; Transforming growth factor-beta, C-terminal; Cystine-knot cytokine;
Q8TD43	Transient receptor potential cation channel subfamily M member 4 OS=Homo sapiens OX=9606 GN=TRPM4 PE=1 SV=1	2.535	Up	0.0115772	TRPM4	134.3	0.9	plasma membrane	GO:0044700 single organism signaling; GO:0065008 regulation of biological quality; GO:0098910 regulation of atrial cardiac muscle cell action potential; GO:0050796 regulation of insulin secretion; GO:0045933 positive regulation of muscle contraction; GO:0030500 regulation of bone mineralization; GO:0002793 positive regulation of peptide secretion; GO:0002724 regulation of T cell cytokine producti…	GO:0016020 membrane; GO:0005783 endoplasmic reticulum; GO:0034706 sodium channel complex; GO:0071944 cell periphery; GO:0005737 cytoplasm; GO:0043025 neuronal cell body; GO:0032991 macromolecular complex; GO:0031224 intrinsic component of membrane; GO:0044424 intracellular part; GO:0005623 cell; GO:0044422 organelle part; GO:0031974 membrane-enclosed lumen; GO:0005654 nucleoplasm; GO:0070013 intr…	GO:0022839 ion gated channel activity; GO:1901265 nucleoside phosphate binding; GO:0022803 passive transmembrane transporter activity; GO:0022892 substrate-specific transporter activity; GO:0005515 protein binding; GO:0015077 monovalent inorganic cation transmembrane transporter activity; GO:0015267 channel activity; GO:0022891 substrate-specific transmembrane transporter activity; GO:1901363 het…	K04979	TRPM4; transient receptor potential cation channel subfamily M member 4	hsa04911 Insulin secretion - Homo sapiens (human);	IPR005821;	Ion transport domain;
Q9ULJ6	Zinc finger MIZ domain-containing protein 1 OS=Homo sapiens OX=9606 GN=ZMIZ1 PE=1 SV=3	1.851	Up	0.0038626	ZMIZ1	115.48	0.7	nucleus	GO:0002694 regulation of leukocyte activation; GO:0022414 reproductive process; GO:0097659 nucleic acid-templated transcription; GO:0043009 chordate embryonic development; GO:0009891 positive regulation of biosynthetic process; GO:0007028 cytoplasm organization; GO:0044237 cellular metabolic process; GO:0048145 regulation of fibroblast proliferation; GO:0008152 metabolic process; GO:0007507 heart…	GO:0043229 intracellular organelle; GO:0044446 intracellular organelle part; GO:0005737 cytoplasm; GO:0031981 nuclear lumen; GO:0044424 intracellular part; GO:0016604 nuclear body; GO:0005623 cell; GO:0044422 organelle part; GO:0043226 organelle; GO:0043231 intracellular membrane-bounded organelle; GO:0031974 membrane-enclosed lumen; GO:0005634 nucleus; GO:0005654 nucleoplasm; GO:0070013 intracel…	GO:0043169 cation binding; GO:0046872 metal ion binding; GO:0008270 zinc ion binding; GO:0046914 transition metal ion binding; GO:0005488 binding; GO:0043167 ion binding;	K22403			IPR004181; IPR013083;	Zinc finger, MIZ-type; Zinc finger, RING/FYVE/PHD-type;
Q9Y5Y5	Peroxisomal membrane protein PEX16 OS=Homo sapiens OX=9606 GN=PEX16 PE=1 SV=2	1.772	Up	0.0030433	PEX16	38.628	3.9	cytoplasm,peroxisome	GO:0044085 cellular component biogenesis; GO:0046907 intracellular transport; GO:0016557 peroxisome membrane biogenesis; GO:0016043 cellular component organization; GO:0015919 peroxisomal membrane transport; GO:0072594 establishment of protein localization to organelle; GO:0017038 protein import; GO:0072663 establishment of protein localization to peroxisome; GO:0044699 single-organism process; G…	GO:0016020 membrane; GO:0042175 nuclear outer membrane-endoplasmic reticulum membrane network; GO:0005783 endoplasmic reticulum; GO:0031090 organelle membrane; GO:0005737 cytoplasm; GO:0044438 microbody part; GO:0031224 intrinsic component of membrane; GO:0044424 intracellular part; GO:0005623 cell; GO:0044422 organelle part; GO:0005778 peroxisomal membrane; GO:0031301 integral component of organ…	GO:0008022 protein C-terminus binding; GO:0005515 protein binding; GO:0005488 binding;	K13335	PEX16; peroxin-16	hsa04146 Peroxisome - Homo sapiens (human);
Q9Y3B8	Oligoribonuclease, mitochondrial OS=Homo sapiens OX=9606 GN=REXO2 PE=1 SV=3	0.464	Down	0.0013784	REXO2	26.832	16	cytoplasm	GO:0006725 cellular aromatic compound metabolic process; GO:0009117 nucleotide metabolic process; GO:0044281 small molecule metabolic process; GO:0044763 single-organism cellular process; GO:0044699 single-organism process; GO:1901360 organic cyclic compound metabolic process; GO:0006807 nitrogen compound metabolic process; GO:0044238 primary metabolic process; GO:0044237 cellular metabolic proce…	GO:0005759 mitochondrial matrix; GO:0043229 intracellular organelle; GO:0044429 mitochondrial part; GO:0043232 intracellular non-membrane-bounded organelle; GO:0030054 cell junction; GO:0031967 organelle envelope; GO:0005737 cytoplasm; GO:0044446 intracellular organelle part; GO:0070161 anchoring junction; GO:0031981 nuclear lumen; GO:0044424 intracellular part; GO:0005730 nucleolus; GO:0005623 c…	GO:0097159 organic cyclic compound binding; GO:1901363 heterocyclic compound binding; GO:0003824 catalytic activity; GO:0005488 binding; GO:0003676 nucleic acid binding; GO:0004518 nuclease activity; GO:0016788 hydrolase activity, acting on ester bonds; GO:0008408 3'-5' exonuclease activity; GO:0004527 exonuclease activity; GO:0016787 hydrolase activity;	K13288	orn, REX2, REXO2; oligoribonuclease [EC:3.1.-.-]	hsa03008 Ribosome biogenesis in eukaryotes - Homo sapiens (human);	IPR012337; IPR013520;	Ribonuclease H-like domain; Exonuclease, RNase T/DNA polymerase III;
P07585	Decorin OS=Homo sapiens OX=9606 GN=DCN PE=1 SV=1	9.246	Up	6.4377e-08	DCN	39.746	27.3	extracellular	GO:0044700 single organism signaling; GO:0022414 reproductive process; GO:0009891 positive regulation of biosynthetic process; GO:0010821 regulation of mitochondrion organization; GO:0044237 cellular metabolic process; GO:0010594 regulation of endothelial cell migration; GO:1904181 positive regulation of membrane depolarization; GO:0009607 response to biotic stimulus; GO:0030203 glycosaminoglycan…	GO:0005615 extracellular space; GO:0044421 extracellular region part; GO:0005737 cytoplasm; GO:0032991 macromolecular complex; GO:0099512 supramolecular fiber; GO:0044424 intracellular part; GO:0099080 supramolecular complex; GO:0005623 cell; GO:0005581 collagen trimer; GO:0044422 organelle part; GO:0005775 vacuolar lumen; GO:0031974 membrane-enclosed lumen; GO:0070013 intracellular organelle lum…	GO:0003723 RNA binding; GO:0047485 protein N-terminus binding; GO:0044877 macromolecular complex binding; GO:0005515 protein binding; GO:0004860 protein kinase inhibitor activity; GO:0019887 protein kinase regulator activity; GO:0019207 kinase regulator activity; GO:0004857 enzyme inhibitor activity; GO:0098772 molecular function regulator; GO:0050840 extracellular matrix binding; GO:0097159 orga…	K04660	DCN; decorin	hsa04350 TGF-beta signaling pathway - Homo sapiens (human); hsa05205 Proteoglycans in cancer - Homo sapiens (human);	IPR000372; IPR032675;	Leucine-rich repeat N-terminal domain; Leucine-rich repeat domain, L domain-like;
Q96AG4	Leucine-rich repeat-containing protein 59 OS=Homo sapiens OX=9606 GN=LRRC59 PE=1 SV=1	0.411	Down	3.1635e-06	LRRC59	34.93	42	cytoplasm,peroxisome		GO:0016020 membrane; GO:0042175 nuclear outer membrane-endoplasmic reticulum membrane network; GO:0005783 endoplasmic reticulum; GO:0031090 organelle membrane; GO:0005737 cytoplasm; GO:0031224 intrinsic component of membrane; GO:0044424 intracellular part; GO:0005623 cell; GO:0044422 organelle part; GO:0043228 non-membrane-bounded organelle; GO:0031974 membrane-enclosed lumen; GO:0070013 intracel…	GO:0097159 organic cyclic compound binding; GO:1901363 heterocyclic compound binding; GO:0050839 cell adhesion molecule binding; GO:0003723 RNA binding; GO:0005488 binding; GO:0045296 cadherin binding; GO:0003676 nucleic acid binding; GO:0005515 protein binding;				IPR032675;	Leucine-rich repeat domain, L domain-like;
Q15545	Transcription initiation factor TFIID subunit 7 OS=Homo sapiens OX=9606 GN=TAF7 PE=1 SV=1	1.547	Up	0.004882	TAF7	40.259	5.4	nucleus	GO:0044085 cellular component biogenesis; GO:0044700 single organism signaling; GO:0060260 regulation of transcription initiation from RNA polymerase II promoter; GO:0097659 nucleic acid-templated transcription; GO:0009891 positive regulation of biosynthetic process; GO:0006354 DNA-templated transcription, elongation; GO:0044237 cellular metabolic process; GO:0008152 metabolic process; GO:0065003…	GO:0070461 SAGA-type complex; GO:0061695 transferase complex, transferring phosphorus-containing groups; GO:0005737 cytoplasm; GO:0032991 macromolecular complex; GO:0044424 intracellular part; GO:0005623 cell; GO:0000123 histone acetyltransferase complex; GO:0044422 organelle part; GO:0031974 membrane-enclosed lumen; GO:1902494 catalytic complex; GO:0005654 nucleoplasm; GO:0031248 protein acetylt…	GO:0003677 DNA binding; GO:0042809 vitamin D receptor binding; GO:0046966 thyroid hormone receptor binding; GO:0046982 protein heterodimerization activity; GO:0005102 receptor binding; GO:0046983 protein dimerization activity; GO:0005515 protein binding; GO:0051427 hormone receptor binding; GO:0003712 transcription cofactor activity; GO:1901363 heterocyclic compound binding; GO:0000975 regulatory…	K03132	TAF7; transcription initiation factor TFIID subunit 7	hsa03022 Basal transcription factors - Homo sapiens (human);	IPR006751;	TAFII55 protein, conserved region;
Q9NRG0	Chromatin accessibility complex protein 1 OS=Homo sapiens OX=9606 GN=CHRAC1 PE=1 SV=1	2.869	Up	1.8685e-05	CHRAC1	14.71	13.7	cytoplasm,nucleus	GO:0016043 cellular component organization; GO:0006338 chromatin remodeling; GO:0006725 cellular aromatic compound metabolic process; GO:0006259 DNA metabolic process; GO:0009058 biosynthetic process; GO:0044237 cellular metabolic process; GO:0071704 organic substance metabolic process; GO:0008152 metabolic process; GO:0046483 heterocycle metabolic process; GO:0006139 nucleobase-containing compou…	GO:0061695 transferase complex, transferring phosphorus-containing groups; GO:0043601 nuclear replisome; GO:0008623 CHRAC; GO:0032991 macromolecular complex; GO:0044424 intracellular part; GO:0070603 SWI/SNF superfamily-type complex; GO:0005623 cell; GO:0044422 organelle part; GO:0044427 chromosomal part; GO:0043228 non-membrane-bounded organelle; GO:0031974 membrane-enclosed lumen; GO:1902494 ca…	GO:0097159 organic cyclic compound binding; GO:1901363 heterocyclic compound binding; GO:0003677 DNA binding; GO:0016779 nucleotidyltransferase activity; GO:0046982 protein heterodimerization activity; GO:0003824 catalytic activity; GO:0005488 binding; GO:0046983 protein dimerization activity; GO:0003676 nucleic acid binding; GO:0034061 DNA polymerase activity; GO:0003887 DNA-directed DNA polymer…	K11656	CHRAC1, CHRAC15; chromatin accessibility complex protein 1		IPR009072; IPR003958;	Histone-fold; Transcription factor CBF/NF-Y/archaeal histone domain;
P28300	Protein-lysine 6-oxidase OS=Homo sapiens OX=9606 GN=LOX PE=1 SV=2	2.322	Up	0.00065945	LOX	46.944	31.7	extracellular	GO:0044085 cellular component biogenesis; GO:0072359 circulatory system development; GO:0016043 cellular component organization; GO:0044707 single-multicellular organism process; GO:0030199 collagen fibril organization; GO:0001568 blood vessel development; GO:0048251 elastic fiber assembly; GO:0030323 respiratory tube development; GO:0044267 cellular protein metabolic process; GO:0044699 single-o…	GO:0043229 intracellular organelle; GO:0005615 extracellular space; GO:0044421 extracellular region part; GO:0032991 macromolecular complex; GO:0044424 intracellular part; GO:0005623 cell; GO:0005576 extracellular region; GO:0005581 collagen trimer; GO:0031012 extracellular matrix; GO:0043231 intracellular membrane-bounded organelle; GO:0043226 organelle; GO:0005634 nucleus; GO:0005622 intracellu…	GO:0046914 transition metal ion binding; GO:0003824 catalytic activity; GO:0005488 binding; GO:0043167 ion binding; GO:0046872 metal ion binding; GO:0043169 cation binding; GO:0005515 protein binding; GO:0016638 oxidoreductase activity, acting on the CH-NH2 group of donors; GO:0005507 copper ion binding; GO:0016641 oxidoreductase activity, acting on the CH-NH2 group of donors, oxygen as acceptor;…	K00277	LOX; protein-lysine 6-oxidase [EC:1.4.3.13]
P00740	Coagulation factor IX OS=Homo sapiens OX=9606 GN=F9 PE=1 SV=2	22.497	Up	1.5007e-06	F9	51.778	2.6	extracellular	GO:0046907 intracellular transport; GO:0044707 single-multicellular organism process; GO:0007596 blood coagulation; GO:0065008 regulation of biological quality; GO:0006518 peptide metabolic process; GO:0007598 blood coagulation, extrinsic pathway; GO:0006465 signal peptide processing; GO:0044267 cellular protein metabolic process; GO:0048193 Golgi vesicle transport; GO:0044699 single-organism pro…	GO:0016020 membrane; GO:0005615 extracellular space; GO:0044421 extracellular region part; GO:0005783 endoplasmic reticulum; GO:0071944 cell periphery; GO:0031982 vesicle; GO:0005737 cytoplasm; GO:0044424 intracellular part; GO:0005623 cell; GO:0044422 organelle part; GO:0070062 extracellular exosome; GO:0031974 membrane-enclosed lumen; GO:0070013 intracellular organelle lumen; GO:0044464 cell pa…	GO:0004252 serine-type endopeptidase activity; GO:0004175 endopeptidase activity; GO:0008233 peptidase activity; GO:0017171 serine hydrolase activity; GO:0003824 catalytic activity; GO:0005488 binding; GO:0043167 ion binding; GO:0008236 serine-type peptidase activity; GO:0046872 metal ion binding; GO:0043169 cation binding; GO:0070011 peptidase activity, acting on L-amino acid peptides; GO:001678…	K01321	F9; coagulation factor IX (Christmas factor) [EC:3.4.21.22]	hsa04610 Complement and coagulation cascades - Homo sapiens (human);	IPR009003; IPR017857; IPR000294; IPR001254; IPR001881; IPR000742;	Peptidase S1, PA clan; Coagulation factor, subgroup, Gla domain; Gamma-carboxyglutamic acid-rich (GLA) domain; Serine proteases, trypsin domain; EGF-like calcium-binding domain; EGF-like domain;
Q9Y2P8	RNA 3'-terminal phosphate cyclase-like protein OS=Homo sapiens OX=9606 GN=RCL1 PE=1 SV=3	2.198	Up	0.0050996	RCL1	40.842	6.7	mitochondria	GO:0044085 cellular component biogenesis; GO:0022613 ribonucleoprotein complex biogenesis; GO:0000466 maturation of 5.8S rRNA from tricistronic rRNA transcript (SSU-rRNA, 5.8S rRNA, LSU-rRNA); GO:0006725 cellular aromatic compound metabolic process; GO:0000480 endonucleolytic cleavage in 5'-ETS of tricistronic rRNA transcript (SSU-rRNA, 5.8S rRNA, LSU-rRNA); GO:0000460 maturation of 5.8S rRNA; GO…	GO:0043229 intracellular organelle; GO:0043232 intracellular non-membrane-bounded organelle; GO:0044446 intracellular organelle part; GO:0031981 nuclear lumen; GO:0044424 intracellular part; GO:0005730 nucleolus; GO:0005623 cell; GO:0044422 organelle part; GO:0043228 non-membrane-bounded organelle; GO:0043226 organelle; GO:0043231 intracellular membrane-bounded organelle; GO:0031974 membrane-encl…	GO:0003824 catalytic activity;	K11108	RCL1; RNA 3'-terminal phosphate cyclase-like protein	hsa03008 Ribosome biogenesis in eukaryotes - Homo sapiens (human);	IPR013791; IPR023797; IPR013792;	RNA 3'-terminal phosphate cyclase, insert domain; RNA 3'-terminal phosphate cyclase domain; RNA 3'-terminal phosphate cyclase/enolpyruvate transferase, alpha/beta;
Q9NZL9	Methionine adenosyltransferase 2 subunit beta OS=Homo sapiens OX=9606 GN=MAT2B PE=1 SV=1	1.67	Up	0.041519	MAT2B	37.551	24.3	cytoplasm	GO:0051188 cofactor biosynthetic process; GO:0006790 sulfur compound metabolic process; GO:0046500 S-adenosylmethionine metabolic process; GO:0044281 small molecule metabolic process; GO:0044763 single-organism cellular process; GO:0044699 single-organism process; GO:0006732 coenzyme metabolic process; GO:0009058 biosynthetic process; GO:1901576 organic substance biosynthetic process; GO:0044237 …	GO:0043229 intracellular organelle; GO:0044421 extracellular region part; GO:0005737 cytoplasm; GO:0031982 vesicle; GO:0032991 macromolecular complex; GO:0044424 intracellular part; GO:1990234 transferase complex; GO:0005829 cytosol; GO:0005623 cell; GO:0005576 extracellular region; GO:0005739 mitochondrion; GO:0043226 organelle; GO:0070062 extracellular exosome; GO:0043231 intracellular membrane…	GO:0005515 protein binding; GO:0098772 molecular function regulator; GO:0030234 enzyme regulator activity; GO:0019899 enzyme binding; GO:0048270 methionine adenosyltransferase regulator activity; GO:0005488 binding;	K00789	metK; S-adenosylmethionine synthetase [EC:2.5.1.6]	hsa00270 Cysteine and methionine metabolism - Homo sapiens (human); hsa01100 Metabolic pathways - Homo sapiens (human); hsa01230 Biosynthesis of amino acids - Homo sapiens (human);	IPR029903; IPR016040;	RmlD-like substrate binding domain; NAD(P)-binding domain;
Q8N5K1	CDGSH iron-sulfur domain-containing protein 2 OS=Homo sapiens OX=9606 GN=CISD2 PE=1 SV=1	0.63	Down	0.00040183	CISD2	15.278	27.4	mitochondria	GO:0050794 regulation of cellular process; GO:0016043 cellular component organization; GO:0044707 single-multicellular organism process; GO:0000422 mitophagy; GO:1903008 organelle disassembly; GO:0044699 single-organism process; GO:0006914 autophagy; GO:0044237 cellular metabolic process; GO:0008152 metabolic process; GO:0007005 mitochondrion organization; GO:0044248 cellular catabolic process; G…	GO:0016020 membrane; GO:0042175 nuclear outer membrane-endoplasmic reticulum membrane network; GO:0019867 outer membrane; GO:0005783 endoplasmic reticulum; GO:0031090 organelle membrane; GO:0005737 cytoplasm; GO:0032991 macromolecular complex; GO:0031224 intrinsic component of membrane; GO:0044424 intracellular part; GO:0005623 cell; GO:0044422 organelle part; GO:0005740 mitochondrial envelope; G…	GO:0003723 RNA binding; GO:0051537 2 iron, 2 sulfur cluster binding; GO:0043167 ion binding; GO:0046983 protein dimerization activity; GO:0005515 protein binding; GO:1901363 heterocyclic compound binding; GO:0097159 organic cyclic compound binding; GO:0042802 identical protein binding; GO:0051536 iron-sulfur cluster binding; GO:0005488 binding; GO:0042803 protein homodimerization activity; GO:000…				IPR018967; IPR019610;	Iron sulphur-containing domain, CDGSH-type; Iron sulphur domain-containing, mitoNEET, N-terminal;
Q96EC8	Protein YIPF6 OS=Homo sapiens OX=9606 GN=YIPF6 PE=1 SV=2	1.539	Up	0.00123629	YIPF6	26.256	5.1	plasma membrane	GO:0032502 developmental process; GO:0060429 epithelium development; GO:0035295 tube development; GO:0044707 single-multicellular organism process; GO:0002064 epithelial cell development; GO:0009888 tissue development; GO:0048731 system development; GO:0048869 cellular developmental process; GO:0044763 single-organism cellular process; GO:0044699 single-organism process; GO:0055123 digestive syst…	GO:0097708 intracellular vesicle; GO:0043229 intracellular organelle; GO:0016020 membrane; GO:0005783 endoplasmic reticulum; GO:0031410 cytoplasmic vesicle; GO:0031982 vesicle; GO:0005801 cis-Golgi network; GO:0044446 intracellular organelle part; GO:0005737 cytoplasm; GO:0031224 intrinsic component of membrane; GO:0030134 ER to Golgi transport vesicle; GO:0012505 endomembrane system; GO:0044424 …	GO:0005515 protein binding; GO:0042802 identical protein binding; GO:0005488 binding;	K22943			IPR006977;	Yip1 domain;
Q8TAA9	Vang-like protein 1 OS=Homo sapiens OX=9606 GN=VANGL1 PE=1 SV=1	0.338	Down	0.044323	VANGL1	59.974	4	plasma membrane	GO:0050794 regulation of cellular process; GO:0044700 single organism signaling; GO:0044707 single-multicellular organism process; GO:0090175 regulation of establishment of planar polarity; GO:0007166 cell surface receptor signaling pathway; GO:0044699 single-organism process; GO:0050896 response to stimulus; GO:0051239 regulation of multicellular organismal process; GO:0035567 non-canonical Wnt …	GO:0016020 membrane; GO:0044459 plasma membrane part; GO:0044464 cell part; GO:0071944 cell periphery; GO:0044425 membrane part; GO:0031224 intrinsic component of membrane; GO:0005623 cell; GO:0016021 integral component of membrane; GO:0016328 lateral plasma membrane; GO:0005886 plasma membrane;	GO:0005515 protein binding; GO:0005488 binding;	K04510	VANGL; vang-like	hsa04310 Wnt signaling pathway - Homo sapiens (human);
P41227	N-alpha-acetyltransferase 10 OS=Homo sapiens OX=9606 GN=NAA10 PE=1 SV=1	0.539	Down	1.5268e-05	NAA10	26.458	27.2	nucleus	GO:0016043 cellular component organization; GO:0006475 internal protein amino acid acetylation; GO:0018209 peptidyl-serine modification; GO:0018002 N-terminal peptidyl-glutamic acid acetylation; GO:0044267 cellular protein metabolic process; GO:0030920 peptidyl-serine acetylation; GO:0044238 primary metabolic process; GO:0044237 cellular metabolic process; GO:0071704 organic substance metabolic p…	GO:0016020 membrane; GO:0005737 cytoplasm; GO:0032991 macromolecular complex; GO:0044424 intracellular part; GO:0005623 cell; GO:0044422 organelle part; GO:0043228 non-membrane-bounded organelle; GO:0031974 membrane-enclosed lumen; GO:1902494 catalytic complex; GO:0070013 intracellular organelle lumen; GO:0031248 protein acetyltransferase complex; GO:0005622 intracellular; GO:0044464 cell part; G…	GO:0034212 peptide N-acetyltransferase activity; GO:1990190 peptide-glutamate-N-acetyltransferase activity; GO:0016746 transferase activity, transferring acyl groups; GO:0003824 catalytic activity; GO:0005488 binding; GO:0004596 peptide alpha-N-acetyltransferase activity; GO:0005515 protein binding; GO:0016747 transferase activity, transferring acyl groups other than amino-acyl groups; GO:0016740…	K20791	NAA10_11, ARD1_2; N-alpha-acetyltransferase 10/11 [EC:2.3.1.255]		IPR000182; IPR016181;	GNAT domain; Acyl-CoA N-acyltransferase;
Q9Y221	60S ribosome subunit biogenesis protein NIP7 homolog OS=Homo sapiens OX=9606 GN=NIP7 PE=1 SV=1	1.658	Up	0.023763	NIP7	20.462	14.4	cytoplasm	GO:0044085 cellular component biogenesis; GO:0016043 cellular component organization; GO:0034622 cellular macromolecular complex assembly; GO:0022613 ribonucleoprotein complex biogenesis; GO:0022618 ribonucleoprotein complex assembly; GO:0042254 ribosome biogenesis; GO:0042273 ribosomal large subunit biogenesis; GO:0042255 ribosome assembly; GO:0043933 macromolecular complex subunit organization;…	GO:0043229 intracellular organelle; GO:0043232 intracellular non-membrane-bounded organelle; GO:0005737 cytoplasm; GO:0044446 intracellular organelle part; GO:0032991 macromolecular complex; GO:0031981 nuclear lumen; GO:0044424 intracellular part; GO:0005730 nucleolus; GO:0005829 cytosol; GO:0005623 cell; GO:0044422 organelle part; GO:0030684 preribosome; GO:0043228 non-membrane-bounded organelle…	GO:0097159 organic cyclic compound binding; GO:1901363 heterocyclic compound binding; GO:0003723 RNA binding; GO:0005515 protein binding; GO:0005488 binding; GO:0003676 nucleic acid binding;	K07565	NIP7; 60S ribosome subunit biogenesis protein NIP7		IPR015947; IPR002478;	PUA-like domain; PUA domain;
Q8IZ81	ELMO domain-containing protein 2 OS=Homo sapiens OX=9606 GN=ELMOD2 PE=1 SV=1	1.581	Up	0.022479	ELMOD2	34.96	3.1	cytoplasm	GO:0050794 regulation of cellular process; GO:0002831 regulation of response to biotic stimulus; GO:0043903 regulation of symbiosis, encompassing mutualism through parasitism; GO:0002252 immune effector process; GO:0098542 defense response to other organism; GO:0044764 multi-organism cellular process; GO:0043207 response to external biotic stimulus; GO:0080134 regulation of response to stress; GO…	GO:0016020 membrane;	GO:0098772 molecular function regulator; GO:0030234 enzyme regulator activity; GO:0008047 enzyme activator activity; GO:0060589 nucleoside-triphosphatase regulator activity; GO:0005096 GTPase activator activity; GO:0030695 GTPase regulator activity;				IPR006816;	ELMO domain;
Q9Y6Z7	Collectin-10 OS=Homo sapiens OX=9606 GN=COLEC10 PE=1 SV=2	25.333	Up	1.59622e-05	COLEC10	30.705	10.1	extracellular	GO:0002253 activation of immune response; GO:0002252 immune effector process; GO:0072376 protein activation cascade; GO:0006959 humoral immune response; GO:0002376 immune system process; GO:0044238 primary metabolic process; GO:0050896 response to stimulus; GO:0048518 positive regulation of biological process; GO:0050776 regulation of immune response; GO:0071704 organic substance metabolic proces…	GO:0044464 cell part; GO:0005622 intracellular; GO:0005737 cytoplasm; GO:0032991 macromolecular complex; GO:0044424 intracellular part; GO:0043234 protein complex; GO:0005623 cell; GO:0005576 extracellular region; GO:0005581 collagen trimer;	GO:0004252 serine-type endopeptidase activity; GO:0004175 endopeptidase activity; GO:0008233 peptidase activity; GO:0003824 catalytic activity; GO:0017171 serine hydrolase activity; GO:0005488 binding; GO:0005537 mannose binding; GO:0008236 serine-type peptidase activity; GO:0030246 carbohydrate binding; GO:0070011 peptidase activity, acting on L-amino acid peptides; GO:0016787 hydrolase activity…	K10065	COLEC10; collectin sub-family member 10		IPR001304; IPR016187; IPR033990; IPR016186;	C-type lectin-like; C-type lectin fold; Collectin, C-type lectin-like domain; C-type lectin-like/link domain;
Q7Z4H8	Protein O-glucosyltransferase 3 OS=Homo sapiens OX=9606 GN=POGLUT3 PE=1 SV=2	0.535	Down	6.4978e-05	POGLUT3	58.572	22.1	mitochondria	GO:0008152 metabolic process; GO:1903509 liposaccharide metabolic process; GO:0006643 membrane lipid metabolic process; GO:0044710 single-organism metabolic process; GO:0044763 single-organism cellular process; GO:0006664 glycolipid metabolic process; GO:1901135 carbohydrate derivative metabolic process; GO:0044699 single-organism process; GO:0044255 cellular lipid metabolic process; GO:0044238 p…	GO:0005788 endoplasmic reticulum lumen; GO:0043229 intracellular organelle; GO:0005783 endoplasmic reticulum; GO:0005737 cytoplasm; GO:0044446 intracellular organelle part; GO:0012505 endomembrane system; GO:0044424 intracellular part; GO:0005623 cell; GO:0044422 organelle part; GO:0043226 organelle; GO:0043231 intracellular membrane-bounded organelle; GO:0031974 membrane-enclosed lumen; GO:00700…	GO:0046527 glucosyltransferase activity; GO:0005515 protein binding; GO:0016757 transferase activity, transferring glycosyl groups; GO:0016758 transferase activity, transferring hexosyl groups; GO:0003824 catalytic activity; GO:0016740 transferase activity; GO:0005488 binding;				IPR013783; IPR014756;	Immunoglobulin-like fold; Immunoglobulin E-set;
P07711	Cathepsin L1 OS=Homo sapiens OX=9606 GN=CTSL PE=1 SV=2	4.468	Up	8.2359e-05	CTSL	37.564	14.1	extracellular	GO:0044700 single organism signaling; GO:0044236 multicellular organism metabolic process; GO:0044699 single-organism process; GO:0031347 regulation of defense response; GO:0044237 cellular metabolic process; GO:0007165 signal transduction; GO:0008152 metabolic process; GO:0007154 cell communication; GO:0045088 regulation of innate immune response; GO:0002250 adaptive immune response; GO:0006915 …	GO:0005615 extracellular space; GO:0044421 extracellular region part; GO:0031410 cytoplasmic vesicle; GO:0005737 cytoplasm; GO:0031982 vesicle; GO:0036021 endolysosome lumen; GO:0044433 cytoplasmic vesicle part; GO:0044424 intracellular part; GO:0036019 endolysosome; GO:0005623 cell; GO:0044422 organelle part; GO:0005775 vacuolar lumen; GO:0070062 extracellular exosome; GO:0031974 membrane-enclos…	GO:0042393 histone binding; GO:0008233 peptidase activity; GO:0001968 fibronectin binding; GO:0044877 macromolecular complex binding; GO:0008236 serine-type peptidase activity; GO:0043394 proteoglycan binding; GO:0097655 serpin family protein binding; GO:0008234 cysteine-type peptidase activity; GO:0005515 protein binding; GO:0016787 hydrolase activity; GO:0004175 endopeptidase activity; GO:00042…	K01365	CTSL; cathepsin L [EC:3.4.22.15]	hsa04140 Autophagy - animal - Homo sapiens (human); hsa04142 Lysosome - Homo sapiens (human); hsa04145 Phagosome - Homo sapiens (human); hsa04210 Apoptosis - Homo sapiens (human); hsa04612 Antigen processing and presentation - Homo sapiens (human); hsa05205 Proteoglycans in cancer - Homo sapiens (human); hsa05323 Rheumatoid arthritis - Homo sapiens (human); hsa05418 Fluid shear stress and atheros…	IPR013201; IPR000668;	Cathepsin propeptide inhibitor domain (I29); Peptidase C1A, papain C-terminal;
P38606	V-type proton ATPase catalytic subunit A OS=Homo sapiens OX=9606 GN=ATP6V1A PE=1 SV=2	0.648	Down	0.0111798	ATP6V1A	68.303	36.6	cytoplasm	GO:0044700 single organism signaling; GO:0065008 regulation of biological quality; GO:0009116 nucleoside metabolic process; GO:0007166 cell surface receptor signaling pathway; GO:0015988 energy coupled proton transmembrane transport, against electrochemical gradient; GO:0030641 regulation of cellular pH; GO:0030004 cellular monovalent inorganic cation homeostasis; GO:0044237 cellular metabolic pr…	GO:0016020 membrane; GO:0044421 extracellular region part; GO:0016324 apical plasma membrane; GO:0031090 organelle membrane; GO:0098796 membrane protein complex; GO:0071944 cell periphery; GO:0031982 vesicle; GO:0005737 cytoplasm; GO:0032991 macromolecular complex; GO:0031224 intrinsic component of membrane; GO:0044424 intracellular part; GO:0033176 proton-transporting V-type ATPase complex; GO:0…	GO:0042625 ATPase coupled ion transmembrane transporter activity; GO:1901265 nucleoside phosphate binding; GO:0015399 primary active transmembrane transporter activity; GO:0022892 substrate-specific transporter activity; GO:0016817 hydrolase activity, acting on acid anhydrides; GO:0044769 ATPase activity, coupled to transmembrane movement of ions, rotational mechanism; GO:0015077 monovalent inorg…	K02145	ATPeV1A, ATP6A; V-type H+-transporting ATPase subunit A [EC:3.6.3.14]	hsa00190 Oxidative phosphorylation - Homo sapiens (human); hsa01100 Metabolic pathways - Homo sapiens (human); hsa04145 Phagosome - Homo sapiens (human); hsa04150 mTOR signaling pathway - Homo sapiens (human); hsa04721 Synaptic vesicle cycle - Homo sapiens (human); hsa04966 Collecting duct acid secretion - Homo sapiens (human); hsa05110 Vibrio cholerae infection - Homo sapiens (human); hsa05120 E…	IPR031686; IPR004100; IPR000194; IPR027417; IPR024034;	ATPsynthase alpha/beta subunit, N-terminal extension; ATPase, F1/V1/A1 complex, alpha/beta subunit, N-terminal domain; ATPase, F1/V1/A1 complex, alpha/beta subunit, nucleotide-binding domain; P-loop containing nucleoside triphosphate hydrolase; ATPase, F1/V1 complex, beta subunit, C-terminal;
Q92466	DNA damage-binding protein 2 OS=Homo sapiens OX=9606 GN=DDB2 PE=1 SV=1	0.453	Down	5.5581e-05	DDB2	47.863	4.9	nucleus	GO:0044085 cellular component biogenesis; GO:0070646 protein modification by small protein removal; GO:0006296 nucleotide-excision repair, DNA incision, 5'-to lesion; GO:0006289 nucleotide-excision repair; GO:0034644 cellular response to UV; GO:0032392 DNA geometric change; GO:0051865 protein autoubiquitination; GO:0044237 cellular metabolic process; GO:0051130 positive regulation of cellular com…	GO:0043229 intracellular organelle; GO:0080008 Cul4-RING E3 ubiquitin ligase complex; GO:0030054 cell junction; GO:0044446 intracellular organelle part; GO:0031461 cullin-RING ubiquitin ligase complex; GO:0031981 nuclear lumen; GO:0032991 macromolecular complex; GO:0044424 intracellular part; GO:1990234 transferase complex; GO:0005623 cell; GO:0044422 organelle part; GO:0031974 membrane-enclosed …	GO:0097159 organic cyclic compound binding; GO:1901363 heterocyclic compound binding; GO:0003677 DNA binding; GO:0005488 binding; GO:0003676 nucleic acid binding; GO:0005515 protein binding; GO:0003684 damaged DNA binding;	K10140	DDB2; DNA damage-binding protein 2	hsa03420 Nucleotide excision repair - Homo sapiens (human); hsa04115 p53 signaling pathway - Homo sapiens (human); hsa04120 Ubiquitin mediated proteolysis - Homo sapiens (human); hsa05161 Hepatitis B - Homo sapiens (human); hsa05169 Epstein-Barr virus infection - Homo sapiens (human); hsa05200 Pathways in cancer - Homo sapiens (human); hsa05202 Transcriptional misregulation in cancer - Homo sapie…	IPR017986; IPR015943;	WD40-repeat-containing domain; WD40/YVTN repeat-like-containing domain;
Q8WUD1	Ras-related protein Rab-2B OS=Homo sapiens OX=9606 GN=RAB2B PE=1 SV=1	1.723	Up	0.0086381	RAB2B	24.214	33.8	cytoplasm	GO:0044700 single organism signaling; GO:0050794 regulation of cellular process; GO:0060627 regulation of vesicle-mediated transport; GO:0044699 single-organism process; GO:0017157 regulation of exocytosis; GO:0051046 regulation of secretion; GO:0050896 response to stimulus; GO:0015031 protein transport; GO:0051234 establishment of localization; GO:0007165 signal transduction; GO:0007154 cell com…	GO:0043229 intracellular organelle; GO:0016020 membrane; GO:0042175 nuclear outer membrane-endoplasmic reticulum membrane network; GO:0005783 endoplasmic reticulum; GO:0044421 extracellular region part; GO:0098588 bounding membrane of organelle; GO:0031090 organelle membrane; GO:0071944 cell periphery; GO:0044446 intracellular organelle part; GO:0005737 cytoplasm; GO:0031982 vesicle; GO:0000139 G…	GO:1901265 nucleoside phosphate binding; GO:0001882 nucleoside binding; GO:0043167 ion binding; GO:0005515 protein binding; GO:0000166 nucleotide binding; GO:1901363 heterocyclic compound binding; GO:0097159 organic cyclic compound binding; GO:0032549 ribonucleoside binding; GO:0097367 carbohydrate derivative binding; GO:0032553 ribonucleotide binding; GO:0005488 binding; GO:0032550 purine ribonu…	K07878	RAB2B; Ras-related protein Rab-2B		IPR005225; IPR027417;	Small GTP-binding protein domain; P-loop containing nucleoside triphosphate hydrolase;
P05121	Plasminogen activator inhibitor 1 OS=Homo sapiens OX=9606 GN=SERPINE1 PE=1 SV=1	5.49	Up	4.0678e-07	SERPINE1	45.059	22.6	extracellular	GO:0060627 regulation of vesicle-mediated transport; GO:0010941 regulation of cell death; GO:0030335 positive regulation of cell migration; GO:0065008 regulation of biological quality; GO:2000351 regulation of endothelial cell apoptotic process; GO:1903318 negative regulation of protein maturation; GO:0098542 defense response to other organism; GO:0009891 positive regulation of biosynthetic proce…	GO:0034774 secretory granule lumen; GO:0016020 membrane; GO:0005615 extracellular space; GO:0044421 extracellular region part; GO:0031410 cytoplasmic vesicle; GO:0071944 cell periphery; GO:0005737 cytoplasm; GO:0031982 vesicle; GO:0044433 cytoplasmic vesicle part; GO:0044424 intracellular part; GO:0005623 cell; GO:0044422 organelle part; GO:0031974 membrane-enclosed lumen; GO:0070062 extracellula…	GO:0002020 protease binding; GO:0004867 serine-type endopeptidase inhibitor activity; GO:0030234 enzyme regulator activity; GO:0005102 receptor binding; GO:0005488 binding; GO:0030414 peptidase inhibitor activity; GO:0061134 peptidase regulator activity; GO:0061135 endopeptidase regulator activity; GO:0005515 protein binding; GO:0004857 enzyme inhibitor activity; GO:0098772 molecular function reg…	K03982	SERPINE1, PAI1; plasminogen activator inhibitor 1	hsa04066 HIF-1 signaling pathway - Homo sapiens (human); hsa04115 p53 signaling pathway - Homo sapiens (human); hsa04218 Cellular senescence - Homo sapiens (human); hsa04371 Apelin signaling pathway - Homo sapiens (human); hsa04390 Hippo signaling pathway - Homo sapiens (human); hsa04610 Complement and coagulation cascades - Homo sapiens (human); hsa04933 AGE-RAGE signaling pathway in diabetic co…	IPR023796;	Serpin domain;
P06733	Alpha-enolase OS=Homo sapiens OX=9606 GN=ENO1 PE=1 SV=2	0.604	Down	2.4663e-05	ENO1	47.168	69.6	cytoplasm	GO:0009116 nucleoside metabolic process; GO:0006165 nucleoside diphosphate phosphorylation; GO:0019362 pyridine nucleotide metabolic process; GO:0006096 glycolytic process; GO:0097659 nucleic acid-templated transcription; GO:0009185 ribonucleoside diphosphate metabolic process; GO:0044237 cellular metabolic process; GO:0009607 response to biotic stimulus; GO:0001558 regulation of cell growth; GO:…	GO:0016020 membrane; GO:0005615 extracellular space; GO:0044421 extracellular region part; GO:0071944 cell periphery; GO:0030016 myofibril; GO:0031982 vesicle; GO:0005737 cytoplasm; GO:0032991 macromolecular complex; GO:0099512 supramolecular fiber; GO:0044424 intracellular part; GO:0099080 supramolecular complex; GO:0005623 cell; GO:0044422 organelle part; GO:0043228 non-membrane-bounded organel…	GO:0000287 magnesium ion binding; GO:0003677 DNA binding; GO:0003723 RNA binding; GO:0004634 phosphopyruvate hydratase activity; GO:0043167 ion binding; GO:0016829 lyase activity; GO:0005515 protein binding; GO:0016836 hydro-lyase activity; GO:0016835 carbon-oxygen lyase activity; GO:1901363 heterocyclic compound binding; GO:0097159 organic cyclic compound binding; GO:0050839 cell adhesion molecu…	K01689	ENO, eno; enolase [EC:4.2.1.11]	hsa00010 Glycolysis / Gluconeogenesis - Homo sapiens (human); hsa01100 Metabolic pathways - Homo sapiens (human); hsa01200 Carbon metabolism - Homo sapiens (human); hsa01230 Biosynthesis of amino acids - Homo sapiens (human); hsa03018 RNA degradation - Homo sapiens (human); hsa04066 HIF-1 signaling pathway - Homo sapiens (human);	IPR029065; IPR020810; IPR029017; IPR020811;	Enolase C-terminal domain-like; Enolase, C-terminal TIM barrel domain; Enolase N-terminal domain-like; Enolase, N-terminal;
Q96SU4	Oxysterol-binding protein-related protein 9 OS=Homo sapiens OX=9606 GN=OSBPL9 PE=1 SV=2	2.41	Up	0.00052263	OSBPL9	83.184	4.6	nucleus	GO:0015918 sterol transport; GO:0015850 organic hydroxy compound transport; GO:1901615 organic hydroxy compound metabolic process; GO:0016053 organic acid biosynthetic process; GO:0044699 single-organism process; GO:0009058 biosynthetic process; GO:0044237 cellular metabolic process; GO:0071704 organic substance metabolic process; GO:0008610 lipid biosynthetic process; GO:0051234 establishment of…	GO:0010008 endosome membrane; GO:0097708 intracellular vesicle; GO:0016020 membrane; GO:0043229 intracellular organelle; GO:0098588 bounding membrane of organelle; GO:0005770 late endosome; GO:0031410 cytoplasmic vesicle; GO:0031090 organelle membrane; GO:0005737 cytoplasm; GO:0044446 intracellular organelle part; GO:0031982 vesicle; GO:0044433 cytoplasmic vesicle part; GO:0044440 endosomal part;…	GO:0015248 sterol transporter activity; GO:0005319 lipid transporter activity; GO:0008289 lipid binding; GO:0022892 substrate-specific transporter activity; GO:0005488 binding; GO:0005215 transporter activity;	K20465	OSBPL9_10_11, ORP9_10_11; oxysterol-binding protein-related protein 9/10/11		IPR011993; IPR001849;	PH domain-like; Pleckstrin homology domain;
Q9HBM1	Kinetochore protein Spc25 OS=Homo sapiens OX=9606 GN=SPC25 PE=1 SV=1	1.78	Up	0.0105414	SPC25	26.152	3.6	cytoplasm,nucleus	GO:0016043 cellular component organization; GO:0000278 mitotic cell cycle; GO:0007059 chromosome segregation; GO:0007067 mitotic nuclear division; GO:0048285 organelle fission; GO:0044763 single-organism cellular process; GO:0007051 spindle organization; GO:0044699 single-organism process; GO:0007017 microtubule-based process; GO:1903047 mitotic cell cycle process; GO:0000226 microtubule cytoskel…	GO:0043229 intracellular organelle; GO:0043232 intracellular non-membrane-bounded organelle; GO:0000779 condensed chromosome, centromeric region; GO:0005737 cytoplasm; GO:0044446 intracellular organelle part; GO:0032991 macromolecular complex; GO:0044424 intracellular part; GO:0005829 cytosol; GO:0005623 cell; GO:0000777 condensed chromosome kinetochore; GO:0044422 organelle part; GO:0031262 Ndc8…	GO:0005515 protein binding; GO:0005488 binding;	K11550	SPBC25, SPC25; kinetochore protein Spc25, animal type
P10909	Clusterin OS=Homo sapiens OX=9606 GN=CLU PE=1 SV=1	7.644	Up	9.5219e-07	CLU	52.494	14.7	extracellular	GO:0044085 cellular component biogenesis; GO:0044700 single organism signaling; GO:1902430 negative regulation of beta-amyloid formation; GO:0010941 regulation of cell death; GO:1905892 negative regulation of cellular response to thapsigargin; GO:0007272 ensheathment of neurons; GO:0032680 regulation of tumor necrosis factor production; GO:0032436 positive regulation of proteasomal ubiquitin-depe…	GO:0030425 dendrite; GO:0016020 membrane; GO:0044421 extracellular region part; GO:0031090 organelle membrane; GO:0005737 cytoplasm; GO:0044433 cytoplasmic vesicle part; GO:0032991 macromolecular complex; GO:0005623 cell; GO:0044422 organelle part; GO:0070062 extracellular exosome; GO:0005622 intracellular; GO:1990777 lipoprotein particle; GO:0099503 secretory vesicle; GO:0043005 neuron projectio…	GO:0051787 misfolded protein binding; GO:0005515 protein binding; GO:0031625 ubiquitin protein ligase binding; GO:0044389 ubiquitin-like protein ligase binding; GO:0051087 chaperone binding; GO:0005488 binding; GO:0019899 enzyme binding;	K17252	CLU; clusterin	hsa04610 Complement and coagulation cascades - Homo sapiens (human);	IPR016015; IPR016014;	Clusterin, C-terminal; Clusterin, N-terminal;
P23284	Peptidyl-prolyl cis-trans isomerase B OS=Homo sapiens OX=9606 GN=PPIB PE=1 SV=2	0.631	Down	0.0025231	PPIB	23.742	53.7	extracellular	GO:0065008 regulation of biological quality; GO:0044827 modulation by host of viral genome replication; GO:0061077 chaperone-mediated protein folding; GO:0044699 single-organism process; GO:0035821 modification of morphology or physiology of other organism; GO:0044237 cellular metabolic process; GO:0045927 positive regulation of growth; GO:0006457 protein folding; GO:0008152 metabolic process; GO…	GO:0005790 smooth endoplasmic reticulum; GO:0016020 membrane; GO:0044421 extracellular region part; GO:0005783 endoplasmic reticulum; GO:0031410 cytoplasmic vesicle; GO:0030054 cell junction; GO:0031982 vesicle; GO:0005737 cytoplasm; GO:0032991 macromolecular complex; GO:0044424 intracellular part; GO:0005623 cell; GO:0044422 organelle part; GO:0048770 pigment granule; GO:0070062 extracellular ex…	GO:0097159 organic cyclic compound binding; GO:1901363 heterocyclic compound binding; GO:0003723 RNA binding; GO:0003755 peptidyl-prolyl cis-trans isomerase activity; GO:0016853 isomerase activity; GO:0003824 catalytic activity; GO:0005488 binding; GO:0044877 macromolecular complex binding; GO:0003676 nucleic acid binding; GO:0005515 protein binding; GO:0051082 unfolded protein binding; GO:007006…	K03768	PPIB, ppiB; peptidyl-prolyl cis-trans isomerase B (cyclophilin B) [EC:5.2.1.8]		IPR002130; IPR029000;	Cyclophilin-type peptidyl-prolyl cis-trans isomerase domain; Cyclophilin-like domain;
O60462	Neuropilin-2 OS=Homo sapiens OX=9606 GN=NRP2 PE=1 SV=3	3.084	Up	4.2125e-05	NRP2	104.83	2	peroxisome	GO:0044700 single organism signaling; GO:0030335 positive regulation of cell migration; GO:0001568 blood vessel development; GO:0007166 cell surface receptor signaling pathway; GO:0040017 positive regulation of locomotion; GO:0048869 cellular developmental process; GO:0048666 neuron development; GO:0032989 cellular component morphogenesis; GO:0022008 neurogenesis; GO:0044699 single-organism proce…	GO:0002116 semaphorin receptor complex; GO:0016020 membrane; GO:0044464 cell part; GO:0071944 cell periphery; GO:0044425 membrane part; GO:0043235 receptor complex; GO:0032991 macromolecular complex; GO:0031224 intrinsic component of membrane; GO:0005623 cell; GO:0005576 extracellular region; GO:0016021 integral component of membrane; GO:0005886 plasma membrane;	GO:0038023 signaling receptor activity; GO:0016773 phosphotransferase activity, alcohol group as acceptor; GO:0019838 growth factor binding; GO:0043167 ion binding; GO:0017154 semaphorin receptor activity; GO:0004713 protein tyrosine kinase activity; GO:0005515 protein binding; GO:0004672 protein kinase activity; GO:0008201 heparin binding; GO:0004888 transmembrane signaling receptor activity; GO…	K06819	NRP2; neuropilin 2		IPR000859; IPR000421; IPR000998; IPR013320; IPR022579; IPR008979;	CUB domain; Coagulation factor 5/8 C-terminal domain; MAM domain; Concanavalin A-like lectin/glucanase domain; Neuropilin, C-terminal; Galactose-binding domain-like;
Q14558	Phosphoribosyl pyrophosphate synthase-associated protein 1 OS=Homo sapiens OX=9606 GN=PRPSAP1 PE=1 SV=2	3.645	Up	0.0140791	PRPSAP1	39.393	25.6	mitochondria	GO:0009165 nucleotide biosynthetic process; GO:0006725 cellular aromatic compound metabolic process; GO:0009117 nucleotide metabolic process; GO:0044699 single-organism process; GO:0009058 biosynthetic process; GO:0044237 cellular metabolic process; GO:0006796 phosphate-containing compound metabolic process; GO:0071704 organic substance metabolic process; GO:0008152 metabolic process; GO:0046483 …		GO:0000287 magnesium ion binding; GO:0004749 ribose phosphate diphosphokinase activity; GO:0043167 ion binding; GO:0005515 protein binding; GO:0004857 enzyme inhibitor activity; GO:0098772 molecular function regulator; GO:0042802 identical protein binding; GO:0030234 enzyme regulator activity; GO:0003824 catalytic activity; GO:0005488 binding; GO:0043169 cation binding; GO:0046872 metal ion bindi…				IPR029099; IPR029057;	Ribose-phosphate pyrophosphokinase, N-terminal domain; Phosphoribosyltransferase-like;
Q02297	Pro-neuregulin-1, membrane-bound isoform OS=Homo sapiens OX=9606 GN=NRG1 PE=1 SV=3	2.139	Up	3.7374e-05	NRG1	70.391	1.7	nucleus	GO:0044085 cellular component biogenesis; GO:0044700 single organism signaling; GO:0010941 regulation of cell death; GO:0048732 gland development; GO:1903955 positive regulation of protein targeting to mitochondrion; GO:0007272 ensheathment of neurons; GO:1901185 negative regulation of ERBB signaling pathway; GO:0060415 muscle tissue morphogenesis; GO:0009891 positive regulation of biosynthetic p…	GO:0016020 membrane; GO:0030425 dendrite; GO:0005615 extracellular space; GO:0044421 extracellular region part; GO:0016324 apical plasma membrane; GO:0009897 external side of plasma membrane; GO:0071944 cell periphery; GO:0005737 cytoplasm; GO:0031224 intrinsic component of membrane; GO:0044424 intracellular part; GO:0005887 integral component of plasma membrane; GO:0005623 cell; GO:0044422 organ…	GO:0030546 receptor activator activity; GO:0008083 growth factor activity; GO:0030297 transmembrane receptor protein tyrosine kinase activator activity; GO:1990782 protein tyrosine kinase binding; GO:0016773 phosphotransferase activity, alcohol group as acceptor; GO:0005085 guanyl-nucleotide exchange factor activity; GO:0005102 receptor binding; GO:0019901 protein kinase binding; GO:0004713 prote…	K05455	NRG1; neuregulin 1	hsa01521 EGFR tyrosine kinase inhibitor resistance - Homo sapiens (human); hsa04012 ErbB signaling pathway - Homo sapiens (human);	IPR003598; IPR007110; IPR013783; IPR003599; IPR002154; IPR000742; IPR013098;	Immunoglobulin subtype 2; Immunoglobulin-like domain; Immunoglobulin-like fold; Immunoglobulin subtype; Neuregulin, C-terminal; EGF-like domain; Immunoglobulin I-set;
Q969Z0	FAST kinase domain-containing protein 4 OS=Homo sapiens OX=9606 GN=TBRG4 PE=1 SV=1	0.394	Down	0.0169846	TBRG4	70.737	2.5	mitochondria	GO:0050794 regulation of cellular process; GO:0016310 phosphorylation; GO:0045786 negative regulation of cell cycle; GO:0042127 regulation of cell proliferation; GO:0044267 cellular protein metabolic process; GO:0044699 single-organism process; GO:0048519 negative regulation of biological process; GO:0048523 negative regulation of cellular process; GO:0044237 cellular metabolic process; GO:000679…	GO:0043226 organelle; GO:0043231 intracellular membrane-bounded organelle; GO:0043229 intracellular organelle; GO:0044464 cell part; GO:0005622 intracellular; GO:0005737 cytoplasm; GO:0044424 intracellular part; GO:0043227 membrane-bounded organelle; GO:0005623 cell; GO:0005739 mitochondrion; GO:0044444 cytoplasmic part;	GO:0097159 organic cyclic compound binding; GO:1901363 heterocyclic compound binding; GO:0003723 RNA binding; GO:0016301 kinase activity; GO:0016773 phosphotransferase activity, alcohol group as acceptor; GO:0003824 catalytic activity; GO:0005488 binding; GO:0003676 nucleic acid binding; GO:0005515 protein binding; GO:0004672 protein kinase activity; GO:0016740 transferase activity; GO:0016772 tr…				IPR013584; IPR013579; IPR010622;	RAP domain; FAST kinase-like protein, subdomain 2; FAST kinase leucine-rich;
Q9NWT1	p21-activated protein kinase-interacting protein 1 OS=Homo sapiens OX=9606 GN=PAK1IP1 PE=1 SV=2	2.62	Up	0.00109811	PAK1IP1	43.963	5.6	cytoplasm,nucleus	GO:0032502 developmental process; GO:0050794 regulation of cellular process; GO:0009968 negative regulation of signal transduction; GO:0023051 regulation of signaling; GO:0044699 single-organism process; GO:0008283 cell proliferation; GO:0048519 negative regulation of biological process; GO:0048523 negative regulation of cellular process; GO:0048585 negative regulation of response to stimulus; GO…	GO:0043229 intracellular organelle; GO:0043232 intracellular non-membrane-bounded organelle; GO:0044446 intracellular organelle part; GO:0031981 nuclear lumen; GO:0044424 intracellular part; GO:0005730 nucleolus; GO:0005623 cell; GO:0044422 organelle part; GO:0043228 non-membrane-bounded organelle; GO:0043231 intracellular membrane-bounded organelle; GO:0043226 organelle; GO:0031974 membrane-encl…	GO:0005515 protein binding; GO:0005488 binding;	K14830	MAK11, PAK1IP1; protein MAK11		IPR017986; IPR015943;	WD40-repeat-containing domain; WD40/YVTN repeat-like-containing domain;
Q4U2R6	39S ribosomal protein L51, mitochondrial OS=Homo sapiens OX=9606 GN=MRPL51 PE=1 SV=1	2.269	Up	4.4797e-05	MRPL51	15.095	9.4	mitochondria	GO:0016043 cellular component organization; GO:0006518 peptide metabolic process; GO:0044267 cellular protein metabolic process; GO:0044699 single-organism process; GO:0009058 biosynthetic process; GO:1901566 organonitrogen compound biosynthetic process; GO:0044237 cellular metabolic process; GO:0043241 protein complex disassembly; GO:0071704 organic substance metabolic process; GO:0008152 metabo…	GO:0016020 membrane; GO:0031090 organelle membrane; GO:0005737 cytoplasm; GO:0032991 macromolecular complex; GO:0044424 intracellular part; GO:0005762 mitochondrial large ribosomal subunit; GO:0005623 cell; GO:0000313 organellar ribosome; GO:0044422 organelle part; GO:0043228 non-membrane-bounded organelle; GO:0005740 mitochondrial envelope; GO:0031974 membrane-enclosed lumen; GO:0070013 intracel…	GO:0005515 protein binding; GO:0003735 structural constituent of ribosome; GO:0005198 structural molecule activity; GO:0005488 binding;	K17432	MRPL51; large subunit ribosomal protein L51
Q9BYG3	MKI67 FHA domain-interacting nucleolar phosphoprotein OS=Homo sapiens OX=9606 GN=NIFK PE=1 SV=1	1.525	Up	0.020277	NIFK	34.222	18.4	nucleus	GO:0044085 cellular component biogenesis; GO:0097659 nucleic acid-templated transcription; GO:0009058 biosynthetic process; GO:0010923 negative regulation of phosphatase activity; GO:0044237 cellular metabolic process; GO:0008152 metabolic process; GO:0022607 cellular component assembly; GO:0065003 macromolecular complex assembly; GO:0035303 regulation of dephosphorylation; GO:0043170 macromolecu…	GO:0043229 intracellular organelle; GO:0043232 intracellular non-membrane-bounded organelle; GO:0005737 cytoplasm; GO:0044446 intracellular organelle part; GO:0031981 nuclear lumen; GO:0044424 intracellular part; GO:0005730 nucleolus; GO:0005623 cell; GO:0044422 organelle part; GO:0043228 non-membrane-bounded organelle; GO:0000793 condensed chromosome; GO:0043226 organelle; GO:0043231 intracellul…	GO:0097159 organic cyclic compound binding; GO:1901363 heterocyclic compound binding; GO:0003723 RNA binding; GO:1901265 nucleoside phosphate binding; GO:0005488 binding; GO:0003676 nucleic acid binding; GO:0005515 protein binding; GO:0000166 nucleotide binding; GO:0036094 small molecule binding;	K14838	NOP15; nucleolar protein 15		IPR000504; IPR021043; IPR012677;	RNA recognition motif domain; MKI67 FHA domain-interacting nucleolar phosphoprotein, FHA Ki67 binding; Nucleotide-binding alpha-beta plait domain;
Q5T7M9	Divergent protein kinase domain 1A OS=Homo sapiens OX=9606 GN=DIPK1A PE=2 SV=1	2.002	Up	0.00042492	DIPK1A	49.024	11.2	plasma membrane		GO:0043229 intracellular organelle; GO:0016020 membrane; GO:0042175 nuclear outer membrane-endoplasmic reticulum membrane network; GO:0005783 endoplasmic reticulum; GO:0044446 intracellular organelle part; GO:0005737 cytoplasm; GO:0031224 intrinsic component of membrane; GO:0012505 endomembrane system; GO:0044424 intracellular part; GO:0005623 cell; GO:0016021 integral component of membrane; GO:0…					IPR029244; IPR022049;	FAM69, N-terminal; FAM69, protein-kinase domain;
Q86WG5	Myotubularin-related protein 13 OS=Homo sapiens OX=9606 GN=SBF2 PE=1 SV=1	1.973	Up	0.02266	SBF2	208.46	0.8	cytoplasm,nucleus	GO:0044085 cellular component biogenesis; GO:0016043 cellular component organization; GO:0044707 single-multicellular organism process; GO:0007272 ensheathment of neurons; GO:0008366 axon ensheathment; GO:0044699 single-organism process; GO:0051259 protein oligomerization; GO:0051262 protein tetramerization; GO:0022607 cellular component assembly; GO:0051345 positive regulation of hydrolase activ…	GO:0043229 intracellular organelle; GO:0016020 membrane; GO:0098588 bounding membrane of organelle; GO:0031090 organelle membrane; GO:0044446 intracellular organelle part; GO:0005737 cytoplasm; GO:0044424 intracellular part; GO:0005623 cell; GO:0005829 cytosol; GO:0044422 organelle part; GO:0043226 organelle; GO:0043231 intracellular membrane-bounded organelle; GO:0005622 intracellular; GO:004446…	GO:0005085 guanyl-nucleotide exchange factor activity; GO:0043167 ion binding; GO:0046983 protein dimerization activity; GO:0005515 protein binding; GO:0098772 molecular function regulator; GO:0042802 identical protein binding; GO:0030234 enzyme regulator activity; GO:0017112 Rab guanyl-nucleotide exchange factor activity; GO:0005488 binding; GO:0019208 phosphatase regulator activity; GO:0042803 …	K18061	SBF1_2, MTMR5_13; myotubularin-related protein 5/13		IPR022096; IPR005112; IPR010569; IPR001849; IPR005113; IPR029021; IPR001194; IPR011993; IPR004182;	SBF1/SBF2 domain; dDENN domain; Myotubularin-like phosphatase domain; Pleckstrin homology domain; uDENN domain; Protein-tyrosine phosphatase-like; DENN domain; PH domain-like; GRAM domain;
Q86UA1	Pre-mRNA-processing factor 39 OS=Homo sapiens OX=9606 GN=PRPF39 PE=1 SV=3	2.671	Up	0.0061211	PRPF39	78.429	2.1	cytoplasm	GO:0044085 cellular component biogenesis; GO:0016043 cellular component organization; GO:0006376 mRNA splice site selection; GO:0022613 ribonucleoprotein complex biogenesis; GO:0022618 ribonucleoprotein complex assembly; GO:0006725 cellular aromatic compound metabolic process; GO:0045292 mRNA cis splicing, via spliceosome; GO:0044237 cellular metabolic process; GO:0071704 organic substance metabo…	GO:0005685 U1 snRNP; GO:0043229 intracellular organelle; GO:0044446 intracellular organelle part; GO:0005684 U2-type spliceosomal complex; GO:0032991 macromolecular complex; GO:0044424 intracellular part; GO:0005681 spliceosomal complex; GO:0005623 cell; GO:0044422 organelle part; GO:0097525 spliceosomal snRNP complex; GO:0043231 intracellular membrane-bounded organelle; GO:0043226 organelle; GO:…	GO:0005515 protein binding; GO:0005488 binding;	K13217	PRPF39, PRP39; pre-mRNA-processing factor 39		IPR011990;	Tetratricopeptide-like helical domain;
Q7KZN9	Cytochrome c oxidase assembly protein COX15 homolog OS=Homo sapiens OX=9606 GN=COX15 PE=1 SV=1	3.491	Up	0.00035562	COX15	46.03	3.4	plasma membrane	GO:0044085 cellular component biogenesis; GO:0051188 cofactor biosynthetic process; GO:0046148 pigment biosynthetic process; GO:0009116 nucleoside metabolic process; GO:0042278 purine nucleoside metabolic process; GO:0006123 mitochondrial electron transport, cytochrome c to oxygen; GO:0006784 heme a biosynthetic process; GO:0009167 purine ribonucleoside monophosphate metabolic process; GO:0009117…	GO:0016020 membrane; GO:0031090 organelle membrane; GO:0005737 cytoplasm; GO:0032991 macromolecular complex; GO:0031224 intrinsic component of membrane; GO:0044424 intracellular part; GO:0044455 mitochondrial membrane part; GO:0005623 cell; GO:0044422 organelle part; GO:0005740 mitochondrial envelope; GO:0044425 membrane part; GO:0005622 intracellular; GO:0044464 cell part; GO:0019866 organelle i…	GO:0015075 ion transmembrane transporter activity; GO:0022892 substrate-specific transporter activity; GO:0015077 monovalent inorganic cation transmembrane transporter activity; GO:0016676 oxidoreductase activity, acting on a heme group of donors, oxygen as acceptor; GO:0016675 oxidoreductase activity, acting on a heme group of donors; GO:0015002 heme-copper terminal oxidase activity; GO:0015078 …	K02259	COX15; cytochrome c oxidase assembly protein subunit 15	hsa00190 Oxidative phosphorylation - Homo sapiens (human); hsa00860 Porphyrin and chlorophyll metabolism - Homo sapiens (human); hsa01100 Metabolic pathways - Homo sapiens (human); hsa04714 Thermogenesis - Homo sapiens (human);	IPR009003;	Peptidase S1, PA clan;
Q4G0F5	Vacuolar protein sorting-associated protein 26B OS=Homo sapiens OX=9606 GN=VPS26B PE=1 SV=2	0.579	Down	0.0089248	VPS26B	39.154	22.3	cytoplasm	GO:0050794 regulation of cellular process; GO:0046907 intracellular transport; GO:0031329 regulation of cellular catabolic process; GO:0016192 vesicle-mediated transport; GO:0009894 regulation of catabolic process; GO:0071702 organic substance transport; GO:0031323 regulation of cellular metabolic process; GO:0010506 regulation of autophagy; GO:0015031 protein transport; GO:0051641 cellular local…	GO:0097708 intracellular vesicle; GO:0043229 intracellular organelle; GO:0016020 membrane; GO:0030904 retromer complex; GO:0005770 late endosome; GO:0031410 cytoplasmic vesicle; GO:0030906 retromer, cargo-selective complex; GO:0098796 membrane protein complex; GO:0005737 cytoplasm; GO:0031982 vesicle; GO:0012505 endomembrane system; GO:0032991 macromolecular complex; GO:0044424 intracellular part…	GO:0022892 substrate-specific transporter activity; GO:0005515 protein binding; GO:0008565 protein transporter activity; GO:0005488 binding; GO:0005215 transporter activity;	K18466	VPS26; vacuolar protein sorting-associated protein 26	hsa04144 Endocytosis - Homo sapiens (human);
O60318	Germinal-center associated nuclear protein OS=Homo sapiens OX=9606 GN=MCM3AP PE=1 SV=2	0.556	Down	0.041497	MCM3AP	218.4	1.1	nucleus	GO:0050658 RNA transport; GO:0046907 intracellular transport; GO:0072594 establishment of protein localization to organelle; GO:0006260 DNA replication; GO:0006725 cellular aromatic compound metabolic process; GO:0017038 protein import; GO:0006259 DNA metabolic process; GO:1902593 single-organism nuclear import; GO:0051028 mRNA transport; GO:0044699 single-organism process; GO:0051169 nuclear tra…	GO:0016020 membrane; GO:0043229 intracellular organelle; GO:0005643 nuclear pore; GO:0031090 organelle membrane; GO:0005635 nuclear envelope; GO:0005737 cytoplasm; GO:0044446 intracellular organelle part; GO:0031967 organelle envelope; GO:0031981 nuclear lumen; GO:0012505 endomembrane system; GO:0032991 macromolecular complex; GO:0044424 intracellular part; GO:0005829 cytosol; GO:0005623 cell; GO…	GO:0097159 organic cyclic compound binding; GO:1901363 heterocyclic compound binding; GO:0003677 DNA binding; GO:0016746 transferase activity, transferring acyl groups; GO:0003824 catalytic activity; GO:0005488 binding; GO:0003676 nucleic acid binding; GO:0016740 transferase activity;				IPR031907; IPR031910; IPR000504; IPR034265; IPR031908;	Germinal-centre associated nuclear protein, MCM3AP domain; Germinal-centre associated nuclear protein, CID domain; RNA recognition motif domain; MCM3AP, RNA recognition motif; Germinal-centre associated nuclear protein, nucleoporin homology domain;
Q8TEA8	D-aminoacyl-tRNA deacylase 1 OS=Homo sapiens OX=9606 GN=DTD1 PE=1 SV=2	0.4	Down	0.00010159	DTD1	23.423	14.8	mitochondria	GO:1901606 alpha-amino acid catabolic process; GO:0065008 regulation of biological quality; GO:0046416 D-amino acid metabolic process; GO:0010608 posttranscriptional regulation of gene expression; GO:0044699 single-organism process; GO:0009058 biosynthetic process; GO:0044237 cellular metabolic process; GO:0008152 metabolic process; GO:0006520 cellular amino acid metabolic process; GO:0043170 mac…	GO:0043229 intracellular organelle; GO:0043232 intracellular non-membrane-bounded organelle; GO:0044446 intracellular organelle part; GO:0005737 cytoplasm; GO:0031981 nuclear lumen; GO:0044424 intracellular part; GO:0005730 nucleolus; GO:0005829 cytosol; GO:0005623 cell; GO:0044422 organelle part; GO:0043228 non-membrane-bounded organelle; GO:0043231 intracellular membrane-bounded organelle; GO:0…	GO:0003677 DNA binding; GO:0002161 aminoacyl-tRNA editing activity; GO:0052689 carboxylic ester hydrolase activity; GO:0043167 ion binding; GO:0016787 hydrolase activity; GO:0051500 D-tyrosyl-tRNA(Tyr) deacylase activity; GO:1901363 heterocyclic compound binding; GO:0097159 organic cyclic compound binding; GO:0003824 catalytic activity; GO:0005488 binding; GO:0003676 nucleic acid binding; GO:0016…	K07560	dtd, DTD1; D-tyrosyl-tRNA(Tyr) deacylase [EC:3.1.-.-]		IPR023509;	D-Tyr tRNAtyr deacylase-like domain;
Q9NX55	Huntingtin-interacting protein K OS=Homo sapiens OX=9606 GN=HYPK PE=1 SV=2	2.579	Up	2.5582e-06	HYPK	14.665	28.7	nucleus		GO:0043229 intracellular organelle; GO:0043232 intracellular non-membrane-bounded organelle; GO:0005737 cytoplasm; GO:0044446 intracellular organelle part; GO:0031981 nuclear lumen; GO:0044424 intracellular part; GO:0005623 cell; GO:0044422 organelle part; GO:0043228 non-membrane-bounded organelle; GO:0005856 cytoskeleton; GO:0043226 organelle; GO:0043231 intracellular membrane-bounded organelle;…	GO:0005515 protein binding; GO:0005488 binding;
O00231	26S proteasome non-ATPase regulatory subunit 11 OS=Homo sapiens OX=9606 GN=PSMD11 PE=1 SV=3	0.499	Down	0.00195772	PSMD11	47.463	34.6	cytoplasm	GO:0044700 single organism signaling; GO:0044085 cellular component biogenesis; GO:0010608 posttranscriptional regulation of gene expression; GO:0051443 positive regulation of ubiquitin-protein transferase activity; GO:0031347 regulation of defense response; GO:0010564 regulation of cell cycle process; GO:0044237 cellular metabolic process; GO:1903364 positive regulation of cellular protein catab…	GO:0016020 membrane; GO:0034774 secretory granule lumen; GO:0044421 extracellular region part; GO:0031410 cytoplasmic vesicle; GO:0005838 proteasome regulatory particle; GO:0031982 vesicle; GO:0005737 cytoplasm; GO:0044433 cytoplasmic vesicle part; GO:0032991 macromolecular complex; GO:0044424 intracellular part; GO:0005623 cell; GO:1904813 ficolin-1-rich granule lumen; GO:0044422 organelle part;…	GO:0005515 protein binding; GO:0005198 structural molecule activity; GO:0005488 binding;	K03036	PSMD11, RPN6; 26S proteasome regulatory subunit N6	hsa03050 Proteasome - Homo sapiens (human); hsa05169 Epstein-Barr virus infection - Homo sapiens (human);	IPR000717; IPR011991; IPR011990;	Proteasome component (PCI) domain; Winged helix-turn-helix DNA-binding domain; Tetratricopeptide-like helical domain;
Q13523	Serine/threonine-protein kinase PRP4 homolog OS=Homo sapiens OX=9606 GN=PRPF4B PE=1 SV=3	1.587	Up	0.00038352	PRPF4B	116.99	11.4	nucleus	GO:0016310 phosphorylation; GO:0006725 cellular aromatic compound metabolic process; GO:0044267 cellular protein metabolic process; GO:0044237 cellular metabolic process; GO:0006796 phosphate-containing compound metabolic process; GO:0071704 organic substance metabolic process; GO:0000398 mRNA splicing, via spliceosome; GO:0008152 metabolic process; GO:0000377 RNA splicing, via transesterificatio…	GO:0043229 intracellular organelle; GO:0043232 intracellular non-membrane-bounded organelle; GO:0044446 intracellular organelle part; GO:0031981 nuclear lumen; GO:0032991 macromolecular complex; GO:0044424 intracellular part; GO:0005681 spliceosomal complex; GO:0016604 nuclear body; GO:0005623 cell; GO:0044422 organelle part; GO:0043228 non-membrane-bounded organelle; GO:0031974 membrane-enclosed…	GO:0003723 RNA binding; GO:0005524 ATP binding; GO:1901265 nucleoside phosphate binding; GO:0016773 phosphotransferase activity, alcohol group as acceptor; GO:0001882 nucleoside binding; GO:0043167 ion binding; GO:0005515 protein binding; GO:0004672 protein kinase activity; GO:0000166 nucleotide binding; GO:1901363 heterocyclic compound binding; GO:0097159 organic cyclic compound binding; GO:0032…	K08827	PRPF4B; serine/threonine-protein kinase PRP4 [EC:2.7.11.1]		IPR000719; IPR011009;	Protein kinase domain; Protein kinase-like domain;
Q93045	Stathmin-2 OS=Homo sapiens OX=9606 GN=STMN2 PE=1 SV=3	0.439	Down	1.9001e-06	STMN2	20.828	15.1	cytoplasm	GO:0051093 negative regulation of developmental process; GO:0045666 positive regulation of neuron differentiation; GO:0031111 negative regulation of microtubule polymerization or depolymerization; GO:0043243 positive regulation of protein complex disassembly; GO:0048869 cellular developmental process; GO:0051129 negative regulation of cellular component organization; GO:0022008 neurogenesis; GO:0…	GO:0097708 intracellular vesicle; GO:0043229 intracellular organelle; GO:0031252 cell leading edge; GO:0016020 membrane; GO:0042995 cell projection; GO:0031410 cytoplasmic vesicle; GO:0005737 cytoplasm; GO:0031982 vesicle; GO:0043025 neuronal cell body; GO:0012505 endomembrane system; GO:0030426 growth cone; GO:0044424 intracellular part; GO:0044463 cell projection part; GO:0030427 site of polari…	GO:0015631 tubulin binding; GO:0005515 protein binding; GO:0008092 cytoskeletal protein binding; GO:0048306 calcium-dependent protein binding; GO:0005488 binding;
P49902	Cytosolic purine 5'-nucleotidase OS=Homo sapiens OX=9606 GN=NT5C2 PE=1 SV=1	0.57	Down	0.00193525	NT5C2	64.969	12.5	cytoplasm	GO:0016310 phosphorylation; GO:0009116 nucleoside metabolic process; GO:0042278 purine nucleoside metabolic process; GO:0009167 purine ribonucleoside monophosphate metabolic process; GO:0006725 cellular aromatic compound metabolic process; GO:0046434 organophosphate catabolic process; GO:0009259 ribonucleotide metabolic process; GO:0009117 nucleotide metabolic process; GO:0044699 single-organism …	GO:0044464 cell part; GO:0005622 intracellular; GO:0005737 cytoplasm; GO:0044424 intracellular part; GO:0005623 cell; GO:0005829 cytosol; GO:0044444 cytoplasmic part;	GO:1901265 nucleoside phosphate binding; GO:0016773 phosphotransferase activity, alcohol group as acceptor; GO:0016791 phosphatase activity; GO:0008252 nucleotidase activity; GO:0050146 nucleoside phosphotransferase activity; GO:0043167 ion binding; GO:0019205 nucleobase-containing compound kinase activity; GO:0005515 protein binding; GO:0016787 hydrolase activity; GO:0000166 nucleotide binding; …	K01081	E3.1.3.5; 5'-nucleotidase [EC:3.1.3.5]	hsa00230 Purine metabolism - Homo sapiens (human); hsa00240 Pyrimidine metabolism - Homo sapiens (human); hsa00760 Nicotinate and nicotinamide metabolism - Homo sapiens (human); hsa01100 Metabolic pathways - Homo sapiens (human);	IPR023214;	HAD-like domain;
P63167	Dynein light chain 1, cytoplasmic OS=Homo sapiens OX=9606 GN=DYNLL1 PE=1 SV=1	0.408	Down	0.037681	DYNLL1	10.366	62.9	cytoplasm	GO:0098840 protein transport along microtubule; GO:0044085 cellular component biogenesis; GO:0065008 regulation of biological quality; GO:0010941 regulation of cell death; GO:0045321 leukocyte activation; GO:0060491 regulation of cell projection assembly; GO:0097659 nucleic acid-templated transcription; GO:0007420 brain development; GO:0060271 cilium assembly; GO:0006914 autophagy; GO:0044237 cel…	GO:0016020 membrane; GO:0044421 extracellular region part; GO:0031090 organelle membrane; GO:0005737 cytoplasm; GO:0044433 cytoplasmic vesicle part; GO:0032991 macromolecular complex; GO:0005623 cell; GO:0099080 supramolecular complex; GO:0044422 organelle part; GO:0043228 non-membrane-bounded organelle; GO:0070062 extracellular exosome; GO:0005622 intracellular; GO:0099503 secretory vesicle; GO:…	GO:0045505 dynein intermediate chain binding; GO:0003774 motor activity; GO:0016462 pyrophosphatase activity; GO:0003824 catalytic activity; GO:0005488 binding; GO:0016817 hydrolase activity, acting on acid anhydrides; GO:0019904 protein domain specific binding; GO:0008022 protein C-terminus binding; GO:0005515 protein binding; GO:0016787 hydrolase activity; GO:0016818 hydrolase activity, acting …	K10418	DYNLL; dynein light chain LC8-type	hsa04962 Vasopressin-regulated water reabsorption - Homo sapiens (human);
P30038	Delta-1-pyrroline-5-carboxylate dehydrogenase, mitochondrial OS=Homo sapiens OX=9606 GN=ALDH4A1 PE=1 SV=3	1.667	Up	0.00121565	ALDH4A1	61.719	9.1	mitochondria	GO:0043648 dicarboxylic acid metabolic process; GO:1901606 alpha-amino acid catabolic process; GO:0019470 4-hydroxyproline catabolic process; GO:0016053 organic acid biosynthetic process; GO:0044699 single-organism process; GO:0009058 biosynthetic process; GO:1901566 organonitrogen compound biosynthetic process; GO:0044237 cellular metabolic process; GO:0009084 glutamine family amino acid biosynt…	GO:0005759 mitochondrial matrix; GO:0043229 intracellular organelle; GO:0044429 mitochondrial part; GO:0005737 cytoplasm; GO:0044446 intracellular organelle part; GO:0044424 intracellular part; GO:0005623 cell; GO:0005739 mitochondrion; GO:0044422 organelle part; GO:0031974 membrane-enclosed lumen; GO:0043226 organelle; GO:0043231 intracellular membrane-bounded organelle; GO:0070013 intracellular…	GO:0009055 electron carrier activity; GO:0016620 oxidoreductase activity, acting on the aldehyde or oxo group of donors, NAD or NADP as acceptor; GO:0016645 oxidoreductase activity, acting on the CH-NH group of donors; GO:0016646 oxidoreductase activity, acting on the CH-NH group of donors, NAD or NADP as acceptor; GO:0042802 identical protein binding; GO:0003824 catalytic activity; GO:0005488 bi…	K00294	E1.2.1.88; 1-pyrroline-5-carboxylate dehydrogenase [EC:1.2.1.88]	hsa00250 Alanine, aspartate and glutamate metabolism - Homo sapiens (human); hsa00330 Arginine and proline metabolism - Homo sapiens (human); hsa01100 Metabolic pathways - Homo sapiens (human);	IPR016161; IPR015590; IPR016162; IPR016163;	Aldehyde/histidinol dehydrogenase; Aldehyde dehydrogenase domain; Aldehyde dehydrogenase N-terminal domain; Aldehyde dehydrogenase, C-terminal;
Q9BXU0	Testis-expressed protein 12 OS=Homo sapiens OX=9606 GN=TEX12 PE=2 SV=1	10.042	Up	0.0059633	TEX12	14.107	5.7	nucleus	GO:0044085 cellular component biogenesis; GO:0000003 reproduction; GO:0016043 cellular component organization; GO:0007059 chromosome segregation; GO:1903046 meiotic cell cycle process; GO:0022414 reproductive process; GO:0048285 organelle fission; GO:0044763 single-organism cellular process; GO:0044699 single-organism process; GO:0051321 meiotic cell cycle; GO:0007129 synapsis; GO:0007127 meiosis…	GO:0043229 intracellular organelle; GO:0043232 intracellular non-membrane-bounded organelle; GO:0044446 intracellular organelle part; GO:0031981 nuclear lumen; GO:0044424 intracellular part; GO:0005623 cell; GO:0044422 organelle part; GO:0099086 synaptonemal structure; GO:0044427 chromosomal part; GO:0043228 non-membrane-bounded organelle; GO:0000793 condensed chromosome; GO:0031974 membrane-encl…		K19537	TEX12; testis-expressed sequence 12 protein
P40227	T-complex protein 1 subunit zeta OS=Homo sapiens OX=9606 GN=CCT6A PE=1 SV=3	0.519	Down	0.0110185	CCT6A	58.024	45.2	cytoplasm	GO:0065008 regulation of biological quality; GO:0061077 chaperone-mediated protein folding; GO:0009891 positive regulation of biosynthetic process; GO:1904816 positive regulation of protein localization to chromosome, telomeric region; GO:0032204 regulation of telomere maintenance; GO:1904851 positive regulation of establishment of protein localization to telomere; GO:0006457 protein folding; GO:…	GO:0044421 extracellular region part; GO:0005874 microtubule; GO:0031982 vesicle; GO:0005737 cytoplasm; GO:0032991 macromolecular complex; GO:0099512 supramolecular fiber; GO:0044424 intracellular part; GO:0005623 cell; GO:0099080 supramolecular complex; GO:0044422 organelle part; GO:0043228 non-membrane-bounded organelle; GO:0070062 extracellular exosome; GO:0005856 cytoskeleton; GO:0015630 micr…	GO:0003723 RNA binding; GO:0005524 ATP binding; GO:1901265 nucleoside phosphate binding; GO:0001882 nucleoside binding; GO:0043167 ion binding; GO:0005515 protein binding; GO:0000166 nucleotide binding; GO:0044183 protein binding involved in protein folding; GO:1901363 heterocyclic compound binding; GO:0097159 organic cyclic compound binding; GO:0032549 ribonucleoside binding; GO:0097367 carbohyd…	K09498	CCT6; T-complex protein 1 subunit zeta		IPR027410; IPR027409; IPR027413;	TCP-1-like chaperonin intermediate domain; GroEL-like apical domain; GroEL-like equatorial domain;
Q6UY14	ADAMTS-like protein 4 OS=Homo sapiens OX=9606 GN=ADAMTSL4 PE=1 SV=2	11.494	Up	3.389e-06	ADAMTSL4	116.54	3	extracellular	GO:0050794 regulation of cellular process; GO:0043413 macromolecule glycosylation; GO:0016043 cellular component organization; GO:0010941 regulation of cell death; GO:0036065 fucosylation; GO:0048869 cellular developmental process; GO:0044267 cellular protein metabolic process; GO:0043067 regulation of programmed cell death; GO:0043065 positive regulation of apoptotic process; GO:0044699 single-o…	GO:0005788 endoplasmic reticulum lumen; GO:0043229 intracellular organelle; GO:0005615 extracellular space; GO:0005783 endoplasmic reticulum; GO:0044421 extracellular region part; GO:0005737 cytoplasm; GO:0044446 intracellular organelle part; GO:0012505 endomembrane system; GO:0044424 intracellular part; GO:0005623 cell; GO:0005614 interstitial matrix; GO:0005576 extracellular region; GO:0044422 …	GO:0004175 endopeptidase activity; GO:0002020 protease binding; GO:0004222 metalloendopeptidase activity; GO:0008233 peptidase activity; GO:0003824 catalytic activity; GO:0005488 binding; GO:0070011 peptidase activity, acting on L-amino acid peptides; GO:0008237 metallopeptidase activity; GO:0005515 protein binding; GO:0016787 hydrolase activity; GO:0019899 enzyme binding;	K23369			IPR010294; IPR010909;	ADAM-TS Spacer 1; PLAC;
P12883	Myosin-7 OS=Homo sapiens OX=9606 GN=MYH7 PE=1 SV=5	5.338	Up	1.6402e-06	MYH7	223.09	1.5	cytoplasm	GO:0030048 actin filament-based movement; GO:0065008 regulation of biological quality; GO:0070252 actin-mediated cell contraction; GO:0003012 muscle system process; GO:0009116 nucleoside metabolic process; GO:0042278 purine nucleoside metabolic process; GO:0009167 purine ribonucleoside monophosphate metabolic process; GO:0060415 muscle tissue morphogenesis; GO:0009117 nucleotide metabolic process…	GO:0030016 myofibril; GO:0005737 cytoplasm; GO:0032991 macromolecular complex; GO:0099512 supramolecular fiber; GO:0044424 intracellular part; GO:0030018 Z disc; GO:0099080 supramolecular complex; GO:0005623 cell; GO:0031674 I band; GO:0032432 actin filament bundle; GO:0044422 organelle part; GO:0043228 non-membrane-bounded organelle; GO:0005856 cytoskeleton; GO:0044464 cell part; GO:0005622 intr…	GO:0003774 motor activity; GO:1901265 nucleoside phosphate binding; GO:0016817 hydrolase activity, acting on acid anhydrides; GO:0005515 protein binding; GO:0016787 hydrolase activity; GO:0016887 ATPase activity; GO:0097159 organic cyclic compound binding; GO:1901363 heterocyclic compound binding; GO:0008092 cytoskeletal protein binding; GO:0016462 pyrophosphatase activity; GO:0003824 catalytic a…	K17751	MYH6_7; myosin heavy chain 6/7	hsa04260 Cardiac muscle contraction - Homo sapiens (human); hsa04261 Adrenergic signaling in cardiomyocytes - Homo sapiens (human); hsa04919 Thyroid hormone signaling pathway - Homo sapiens (human); hsa05410 Hypertrophic cardiomyopathy (HCM) - Homo sapiens (human); hsa05414 Dilated cardiomyopathy (DCM) - Homo sapiens (human); hsa05416 Viral myocarditis - Homo sapiens (human);	IPR002928; IPR004009; IPR027417; IPR001609; IPR027401;	Myosin tail; Myosin, N-terminal, SH3-like; P-loop containing nucleoside triphosphate hydrolase; Myosin head, motor domain; Myosin-like IQ motif-containing domain;
O60504	Vinexin OS=Homo sapiens OX=9606 GN=SORBS3 PE=1 SV=2	0.546	Down	0.044998	SORBS3	75.34	9.8	nucleus	GO:0003012 muscle system process; GO:0032270 positive regulation of cellular protein metabolic process; GO:0023051 regulation of signaling; GO:1902533 positive regulation of intracellular signal transduction; GO:0044699 single-organism process; GO:0051253 negative regulation of RNA metabolic process; GO:0051130 positive regulation of cellular component organization; GO:0022610 biological adhesion…	GO:0043229 intracellular organelle; GO:0043232 intracellular non-membrane-bounded organelle; GO:0030054 cell junction; GO:0005737 cytoplasm; GO:0070161 anchoring junction; GO:0044424 intracellular part; GO:0005623 cell; GO:0005829 cytosol; GO:0043228 non-membrane-bounded organelle; GO:0043226 organelle; GO:0005856 cytoskeleton; GO:0043231 intracellular membrane-bounded organelle; GO:0005634 nucle…	GO:0008092 cytoskeletal protein binding; GO:0005200 structural constituent of cytoskeleton; GO:0017166 vinculin binding; GO:0005488 binding; GO:0005515 protein binding; GO:0005198 structural molecule activity; GO:0008134 transcription factor binding;				IPR001452; IPR003127;	SH3 domain; SoHo domain;
O95497	Pantetheinase OS=Homo sapiens OX=9606 GN=VNN1 PE=1 SV=2	30.962	Up	6.291e-07	VNN1	57.011	1.4	extracellular	GO:0002694 regulation of leukocyte activation; GO:0010941 regulation of cell death; GO:0045321 leukocyte activation; GO:0044237 cellular metabolic process; GO:0042157 lipoprotein metabolic process; GO:0022610 biological adhesion; GO:0008152 metabolic process; GO:0051240 positive regulation of multicellular organismal process; GO:0032787 monocarboxylic acid metabolic process; GO:0007155 cell adhes…	GO:0016020 membrane; GO:0044421 extracellular region part; GO:0031090 organelle membrane; GO:0031410 cytoplasmic vesicle; GO:0071944 cell periphery; GO:0005737 cytoplasm; GO:0031982 vesicle; GO:0044433 cytoplasmic vesicle part; GO:0031224 intrinsic component of membrane; GO:0044424 intracellular part; GO:0005623 cell; GO:0044422 organelle part; GO:0070062 extracellular exosome; GO:0005765 lysosom…	GO:0016787 hydrolase activity; GO:0016811 hydrolase activity, acting on carbon-nitrogen (but not peptide) bonds, in linear amides; GO:0003824 catalytic activity; GO:0017159 pantetheine hydrolase activity; GO:0016810 hydrolase activity, acting on carbon-nitrogen (but not peptide) bonds;	K08069	VNN; pantetheine hydrolase [EC:3.5.1.92]	hsa00770 Pantothenate and CoA biosynthesis - Homo sapiens (human);	IPR003010;	Carbon-nitrogen hydrolase;
O00116	Alkyldihydroxyacetonephosphate synthase, peroxisomal OS=Homo sapiens OX=9606 GN=AGPS PE=1 SV=1	1.511	Up	0.0023367	AGPS	72.911	27.1	cytoplasm	GO:0008611 ether lipid biosynthetic process; GO:0044711 single-organism biosynthetic process; GO:0055114 oxidation-reduction process; GO:0044281 small molecule metabolic process; GO:0046504 glycerol ether biosynthetic process; GO:0044763 single-organism cellular process; GO:0046485 ether lipid metabolic process; GO:0044699 single-organism process; GO:0018904 ether metabolic process; GO:0044255 ce…	GO:0016020 membrane; GO:0031090 organelle membrane; GO:0005737 cytoplasm; GO:0044438 microbody part; GO:0044424 intracellular part; GO:0005623 cell; GO:0044422 organelle part; GO:0005778 peroxisomal membrane; GO:0043228 non-membrane-bounded organelle; GO:0031974 membrane-enclosed lumen; GO:0070013 intracellular organelle lumen; GO:0005782 peroxisomal matrix; GO:0005622 intracellular; GO:0044464 c…	GO:1901265 nucleoside phosphate binding; GO:0050660 flavin adenine dinucleotide binding; GO:0043167 ion binding; GO:0005515 protein binding; GO:0000166 nucleotide binding; GO:0048037 cofactor binding; GO:0016491 oxidoreductase activity; GO:0071949 FAD binding; GO:0016614 oxidoreductase activity, acting on CH-OH group of donors; GO:1901363 heterocyclic compound binding; GO:0097159 organic cyclic c…	K00803	AGPS, agpS; alkyldihydroxyacetonephosphate synthase [EC:2.5.1.26]	hsa00565 Ether lipid metabolism - Homo sapiens (human); hsa01100 Metabolic pathways - Homo sapiens (human); hsa04146 Peroxisome - Homo sapiens (human);	IPR016166; IPR004113; IPR016169; IPR016164; IPR006094; IPR016167;	FAD-binding, type 2; FAD-linked oxidase, C-terminal; CO dehydrogenase flavoprotein-like, FAD-binding, subdomain 2; FAD-linked oxidase-like, C-terminal; FAD linked oxidase, N-terminal; FAD-binding, type 2, subdomain 1;
Q5VTU8	ATP synthase subunit epsilon-like protein, mitochondrial OS=Homo sapiens OX=9606 GN=ATP5F1EP2 PE=1 SV=1	0.612	Down	0.049983	ATP5F1EP2	5.8068	29.4	mitochondria	GO:0009116 nucleoside metabolic process; GO:0042278 purine nucleoside metabolic process; GO:0009167 purine ribonucleoside monophosphate metabolic process; GO:0090662 ATP hydrolysis coupled transmembrane transport; GO:0009117 nucleotide metabolic process; GO:0044699 single-organism process; GO:0009058 biosynthetic process; GO:0009163 nucleoside biosynthetic process; GO:0046129 purine ribonucleosid…	GO:0016020 membrane; GO:0098800 inner mitochondrial membrane protein complex; GO:0031090 organelle membrane; GO:0098796 membrane protein complex; GO:0005737 cytoplasm; GO:0032991 macromolecular complex; GO:0098798 mitochondrial protein complex; GO:0044424 intracellular part; GO:0044455 mitochondrial membrane part; GO:0005623 cell; GO:0044422 organelle part; GO:0005740 mitochondrial envelope; GO:0…	GO:0022804 active transmembrane transporter activity; GO:0042625 ATPase coupled ion transmembrane transporter activity; GO:0015075 ion transmembrane transporter activity; GO:0022853 active ion transmembrane transporter activity; GO:0015399 primary active transmembrane transporter activity; GO:0022892 substrate-specific transporter activity; GO:0016817 hydrolase activity, acting on acid anhydrides…	K02135	ATPeF1E, ATP5E, ATP15; F-type H+-transporting ATPase subunit epsilon	hsa00190 Oxidative phosphorylation - Homo sapiens (human); hsa01100 Metabolic pathways - Homo sapiens (human); hsa04714 Thermogenesis - Homo sapiens (human); hsa05010 Alzheimer disease - Homo sapiens (human); hsa05012 Parkinson disease - Homo sapiens (human); hsa05016 Huntington disease - Homo sapiens (human);
Q8TAF3	WD repeat-containing protein 48 OS=Homo sapiens OX=9606 GN=WDR48 PE=1 SV=1	3.977	Up	4.264e-05	WDR48	76.21	5	mitochondria	GO:0070646 protein modification by small protein removal; GO:0065008 regulation of biological quality; GO:0022414 reproductive process; GO:0008584 male gonad development; GO:0044699 single-organism process; GO:0044764 multi-organism cellular process; GO:0044237 cellular metabolic process; GO:0031396 regulation of protein ubiquitination; GO:0008152 metabolic process; GO:1902525 regulation of prote…	GO:0097708 intracellular vesicle; GO:0043229 intracellular organelle; GO:0005770 late endosome; GO:0031410 cytoplasmic vesicle; GO:0044446 intracellular organelle part; GO:0005737 cytoplasm; GO:0031982 vesicle; GO:0031981 nuclear lumen; GO:0012505 endomembrane system; GO:0044424 intracellular part; GO:0005623 cell; GO:0044422 organelle part; GO:0031974 membrane-enclosed lumen; GO:0043226 organell…	GO:0008233 peptidase activity; GO:0036459 thiol-dependent ubiquitinyl hydrolase activity; GO:0003824 catalytic activity; GO:0005488 binding; GO:0019783 ubiquitin-like protein-specific protease activity; GO:0101005 ubiquitinyl hydrolase activity; GO:0070011 peptidase activity, acting on L-amino acid peptides; GO:0008234 cysteine-type peptidase activity; GO:0016787 hydrolase activity; GO:0005515 pr…	K15361	WDR48, UAF1; WD repeat-containing protein 48	hsa03460 Fanconi anemia pathway - Homo sapiens (human);	IPR017986; IPR015943;	WD40-repeat-containing domain; WD40/YVTN repeat-like-containing domain;
Q15287	RNA-binding protein with serine-rich domain 1 OS=Homo sapiens OX=9606 GN=RNPS1 PE=1 SV=1	3.473	Up	0.000178403	RNPS1	34.208	8.9	nucleus	GO:0050658 RNA transport; GO:0010941 regulation of cell death; GO:0000381 regulation of alternative mRNA splicing, via spliceosome; GO:0097659 nucleic acid-templated transcription; GO:0050686 negative regulation of mRNA processing; GO:0009058 biosynthetic process; GO:0051168 nuclear export; GO:0051169 nuclear transport; GO:0051253 negative regulation of RNA metabolic process; GO:1903312 negative …	GO:0043229 intracellular organelle; GO:0044446 intracellular organelle part; GO:0005737 cytoplasm; GO:0032991 macromolecular complex; GO:0031981 nuclear lumen; GO:0044424 intracellular part; GO:0016604 nuclear body; GO:0005623 cell; GO:0005829 cytosol; GO:0044422 organelle part; GO:0043231 intracellular membrane-bounded organelle; GO:0043226 organelle; GO:0031974 membrane-enclosed lumen; GO:00056…	GO:0097159 organic cyclic compound binding; GO:1901363 heterocyclic compound binding; GO:0003729 mRNA binding; GO:0003723 RNA binding; GO:1901265 nucleoside phosphate binding; GO:0003730 mRNA 3'-UTR binding; GO:0005488 binding; GO:0003676 nucleic acid binding; GO:0005515 protein binding; GO:0000166 nucleotide binding; GO:0036094 small molecule binding;	K14325	RNPS1; RNA-binding protein with serine-rich domain 1	hsa03013 RNA transport - Homo sapiens (human); hsa03015 mRNA surveillance pathway - Homo sapiens (human);	IPR034201; IPR000504; IPR012677;	RNPS1, RNA recognition motif; RNA recognition motif domain; Nucleotide-binding alpha-beta plait domain;
Q14690	Protein RRP5 homolog OS=Homo sapiens OX=9606 GN=PDCD11 PE=1 SV=3	1.772	Up	0.00031889	PDCD11	208.7	4.9	cytoplasm,nucleus	GO:0016072 rRNA metabolic process; GO:0034470 ncRNA processing; GO:0044085 cellular component biogenesis; GO:0006396 RNA processing; GO:0022613 ribonucleoprotein complex biogenesis; GO:0006725 cellular aromatic compound metabolic process; GO:0042254 ribosome biogenesis; GO:1901360 organic cyclic compound metabolic process; GO:0006807 nitrogen compound metabolic process; GO:0044238 primary metabol…	GO:0043229 intracellular organelle; GO:0043232 intracellular non-membrane-bounded organelle; GO:0005737 cytoplasm; GO:0044446 intracellular organelle part; GO:0032991 macromolecular complex; GO:0031981 nuclear lumen; GO:0044424 intracellular part; GO:0005730 nucleolus; GO:0005829 cytosol; GO:0005623 cell; GO:0044422 organelle part; GO:0043228 non-membrane-bounded organelle; GO:0030684 preribosome…	GO:0097159 organic cyclic compound binding; GO:1901363 heterocyclic compound binding; GO:0003723 RNA binding; GO:0005488 binding; GO:0003676 nucleic acid binding; GO:0005515 protein binding; GO:0008134 transcription factor binding;	K14792	RRP5, PDCD11; rRNA biogenesis protein RRP5		IPR012340; IPR003029; IPR011990; IPR022967; IPR013026; IPR008847;	Nucleic acid-binding, OB-fold; S1 domain; Tetratricopeptide-like helical domain; RNA-binding domain, S1; Tetratricopeptide repeat-containing domain; Suppressor of forked;
P52888	Thimet oligopeptidase OS=Homo sapiens OX=9606 GN=THOP1 PE=1 SV=2	0.608	Down	0.0003795	THOP1	78.839	17.1	cytoplasm	GO:0008152 metabolic process; GO:0006518 peptide metabolic process; GO:0006807 nitrogen compound metabolic process; GO:0006508 proteolysis; GO:0034641 cellular nitrogen compound metabolic process; GO:0043170 macromolecule metabolic process; GO:0019538 protein metabolic process; GO:0043603 cellular amide metabolic process; GO:0044238 primary metabolic process; GO:0044237 cellular metabolic process…	GO:0043229 intracellular organelle; GO:0044429 mitochondrial part; GO:0044446 intracellular organelle part; GO:0031967 organelle envelope; GO:0005737 cytoplasm; GO:0044424 intracellular part; GO:0005623 cell; GO:0005739 mitochondrion; GO:0044422 organelle part; GO:0005740 mitochondrial envelope; GO:0043231 intracellular membrane-bounded organelle; GO:0043226 organelle; GO:0031974 membrane-enclose…	GO:0004175 endopeptidase activity; GO:0004222 metalloendopeptidase activity; GO:0008233 peptidase activity; GO:0042277 peptide binding; GO:0003824 catalytic activity; GO:0005488 binding; GO:0043167 ion binding; GO:0046872 metal ion binding; GO:0043169 cation binding; GO:0070011 peptidase activity, acting on L-amino acid peptides; GO:0005515 protein binding; GO:0016787 hydrolase activity; GO:00082…	K01392	THOP1; thimet oligopeptidase [EC:3.4.24.15]	hsa04614 Renin-angiotensin system - Homo sapiens (human); hsa05143 African trypanosomiasis - Homo sapiens (human);	IPR024077; IPR001567; IPR024080; IPR024079;	Neurolysin/Thimet oligopeptidase, domain 2; Peptidase M3A/M3B catalytic domain; Neurolysin/Thimet oligopeptidase, N-terminal; Metallopeptidase, catalytic domain;
Q96A26	Protein FAM162A OS=Homo sapiens OX=9606 GN=FAM162A PE=1 SV=2	0.404	Down	4.0755e-05	FAM162A	17.342	12.3	plasma membrane	GO:0010941 regulation of cell death; GO:0032270 positive regulation of cellular protein metabolic process; GO:0090199 regulation of release of cytochrome c from mitochondria; GO:0070997 neuron death; GO:0023051 regulation of signaling; GO:0044699 single-organism process; GO:0010821 regulation of mitochondrion organization; GO:0051130 positive regulation of cellular component organization; GO:2001…	GO:0043229 intracellular organelle; GO:0016020 membrane; GO:0044421 extracellular region part; GO:0005737 cytoplasm; GO:0031982 vesicle; GO:0031224 intrinsic component of membrane; GO:0044424 intracellular part; GO:0005623 cell; GO:0005829 cytosol; GO:0016021 integral component of membrane; GO:0005576 extracellular region; GO:0005739 mitochondrion; GO:0043231 intracellular membrane-bounded organe…	GO:0005515 protein binding; GO:0005488 binding;
P48634	Protein PRRC2A OS=Homo sapiens OX=9606 GN=PRRC2A PE=1 SV=3	1.628	Up	0.0029228	PRRC2A	228.86	5.1	nucleus	GO:0032502 developmental process; GO:0030154 cell differentiation; GO:0044767 single-organism developmental process; GO:0048869 cellular developmental process; GO:0044763 single-organism cellular process; GO:0044699 single-organism process; GO:0009987 cellular process;	GO:0043229 intracellular organelle; GO:0016020 membrane; GO:0044421 extracellular region part; GO:0005737 cytoplasm; GO:0031982 vesicle; GO:0044424 intracellular part; GO:0005623 cell; GO:0005576 extracellular region; GO:0043226 organelle; GO:0070062 extracellular exosome; GO:0043231 intracellular membrane-bounded organelle; GO:0005634 nucleus; GO:0005622 intracellular; GO:0044464 cell part; GO:1…	GO:0097159 organic cyclic compound binding; GO:1901363 heterocyclic compound binding; GO:0003723 RNA binding; GO:0005515 protein binding; GO:0005488 binding; GO:0003676 nucleic acid binding;				IPR009738;	BAT2, N-terminal;
P62851	40S ribosomal protein S25 OS=Homo sapiens OX=9606 GN=RPS25 PE=1 SV=1	0.518	Down	0.038381	RPS25	13.742	36	nucleus	GO:0044085 cellular component biogenesis; GO:0022613 ribonucleoprotein complex biogenesis; GO:0072594 establishment of protein localization to organelle; GO:0006518 peptide metabolic process; GO:0009058 biosynthetic process; GO:0044764 multi-organism cellular process; GO:0044237 cellular metabolic process; GO:0015031 protein transport; GO:0051234 establishment of localization; GO:0006605 protein …	GO:0044421 extracellular region part; GO:0031982 vesicle; GO:0015935 small ribosomal subunit; GO:0005737 cytoplasm; GO:0032991 macromolecular complex; GO:0044424 intracellular part; GO:0005623 cell; GO:0044422 organelle part; GO:0043228 non-membrane-bounded organelle; GO:0070062 extracellular exosome; GO:0031974 membrane-enclosed lumen; GO:0005654 nucleoplasm; GO:0070013 intracellular organelle l…	GO:0097159 organic cyclic compound binding; GO:1901363 heterocyclic compound binding; GO:0003723 RNA binding; GO:0005515 protein binding; GO:0005488 binding; GO:0003676 nucleic acid binding;	K02975	RP-S25e, RPS25; small subunit ribosomal protein S25e	hsa03010 Ribosome - Homo sapiens (human);
Q8IXH7	Negative elongation factor C/D OS=Homo sapiens OX=9606 GN=NELFCD PE=1 SV=2	1.94	Up	0.0038959	NELFCD	66.246	2.7	cytoplasm	GO:0097659 nucleic acid-templated transcription; GO:0009891 positive regulation of biosynthetic process; GO:0009058 biosynthetic process; GO:0006354 DNA-templated transcription, elongation; GO:0044237 cellular metabolic process; GO:0051253 negative regulation of RNA metabolic process; GO:2001141 regulation of RNA biosynthetic process; GO:0008152 metabolic process; GO:0009893 positive regulation o…	GO:0043229 intracellular organelle; GO:0016020 membrane; GO:0044446 intracellular organelle part; GO:0032991 macromolecular complex; GO:0031981 nuclear lumen; GO:0044424 intracellular part; GO:0005623 cell; GO:0044422 organelle part; GO:0043226 organelle; GO:0043231 intracellular membrane-bounded organelle; GO:0031974 membrane-enclosed lumen; GO:0005654 nucleoplasm; GO:0005634 nucleus; GO:0070013…	GO:0097159 organic cyclic compound binding; GO:1901363 heterocyclic compound binding; GO:0003723 RNA binding; GO:0005515 protein binding; GO:0005488 binding; GO:0003676 nucleic acid binding;	K15181	TH1L, NELFD; negative elongation factor C/D
Q07666	KH domain-containing, RNA-binding, signal transduction-associated protein 1 OS=Homo sapiens OX=9606 GN=KHDRBS1 PE=1 SV=1	0.407	Down	1.53702e-05	KHDRBS1	48.227	16.9	cytoplasm	GO:0044700 single organism signaling; GO:0032270 positive regulation of cellular protein metabolic process; GO:0007166 cell surface receptor signaling pathway; GO:0097659 nucleic acid-templated transcription; GO:0010608 posttranscriptional regulation of gene expression; GO:0009891 positive regulation of biosynthetic process; GO:0044237 cellular metabolic process; GO:0008152 metabolic process; GO:…	GO:0043229 intracellular organelle; GO:0016020 membrane; GO:0071944 cell periphery; GO:0098796 membrane protein complex; GO:0098797 plasma membrane protein complex; GO:0044446 intracellular organelle part; GO:0005737 cytoplasm; GO:0032991 macromolecular complex; GO:0031981 nuclear lumen; GO:0044424 intracellular part; GO:0005623 cell; GO:0005829 cytosol; GO:0044422 organelle part; GO:0005886 plas…	GO:0008143 poly(A) binding; GO:0003677 DNA binding; GO:0003723 RNA binding; GO:0030674 protein binding, bridging; GO:0044877 macromolecular complex binding; GO:0005515 protein binding; GO:0070717 poly-purine tract binding; GO:0017124 SH3 domain binding; GO:0003727 single-stranded RNA binding; GO:1901363 heterocyclic compound binding; GO:0097159 organic cyclic compound binding; GO:0005070 SH3/SH2 …	K13198	KHDRBS1; KH domain-containing, RNA-binding, signal transduction-associated protein 1		IPR004087; IPR032571; IPR004088; IPR032335;	K Homology domain; KHDRBS, Qua1 domain; K Homology domain, type 1; Sam68, tyrosine-rich domain;
Q8N4T0	Carboxypeptidase A6 OS=Homo sapiens OX=9606 GN=CPA6 PE=1 SV=2	15.162	Up	2.1341e-07	CPA6	51.007	1.6	mitochondria	GO:0006508 proteolysis; GO:0008152 metabolic process; GO:0043170 macromolecule metabolic process; GO:0019538 protein metabolic process; GO:0044238 primary metabolic process; GO:0071704 organic substance metabolic process;	GO:0031012 extracellular matrix; GO:0005615 extracellular space; GO:0044421 extracellular region part; GO:0005576 extracellular region; GO:0005578 proteinaceous extracellular matrix;	GO:0004180 carboxypeptidase activity; GO:0008233 peptidase activity; GO:0008238 exopeptidase activity; GO:0046914 transition metal ion binding; GO:0004181 metallocarboxypeptidase activity; GO:0003824 catalytic activity; GO:0005488 binding; GO:0043167 ion binding; GO:0008235 metalloexopeptidase activity; GO:0046872 metal ion binding; GO:0043169 cation binding; GO:0070011 peptidase activity, acting…	K08782	CPA6; carboxypeptidase A6 [EC:3.4.17.1]		IPR003146; IPR000834; IPR009020; IPR033843;	Carboxypeptidase, activation peptide; Peptidase M14, carboxypeptidase A; Proteinase propeptide inhibitor; Carboxypeptidase A6;
O76003	Glutaredoxin-3 OS=Homo sapiens OX=9606 GN=GLRX3 PE=1 SV=2	0.594	Down	0.027377	GLRX3	37.432	33.1	cytoplasm	GO:0050794 regulation of cellular process; GO:0044085 cellular component biogenesis; GO:0051188 cofactor biosynthetic process; GO:0016043 cellular component organization; GO:0065008 regulation of biological quality; GO:1903522 regulation of blood circulation; GO:0045454 cell redox homeostasis; GO:0051241 negative regulation of multicellular organismal process; GO:0044699 single-organism process; …	GO:0030425 dendrite; GO:0044421 extracellular region part; GO:0005938 cell cortex; GO:0071944 cell periphery; GO:0030016 myofibril; GO:0031982 vesicle; GO:0005737 cytoplasm; GO:0099568 cytoplasmic region; GO:0099512 supramolecular fiber; GO:0044424 intracellular part; GO:0030018 Z disc; GO:0099080 supramolecular complex; GO:0005623 cell; GO:0031674 I band; GO:0044422 organelle part; GO:0043228 no…	GO:0015035 protein disulfide oxidoreductase activity; GO:0003723 RNA binding; GO:0043167 ion binding; GO:0019901 protein kinase binding; GO:0005515 protein binding; GO:0019900 kinase binding; GO:0016491 oxidoreductase activity; GO:0015036 disulfide oxidoreductase activity; GO:1901363 heterocyclic compound binding; GO:0097159 organic cyclic compound binding; GO:0009055 electron carrier activity; G…				IPR002109; IPR033658; IPR012336; IPR013766;	Glutaredoxin; Glutaredoxin, PICOT-like; Thioredoxin-like fold; Thioredoxin domain;
P09429	High mobility group protein B1 OS=Homo sapiens OX=9606 GN=HMGB1 PE=1 SV=3	0.632	Down	0.029196	HMGB1	24.893	45.6	nucleus	GO:0044700 single organism signaling; GO:0002694 regulation of leukocyte activation; GO:0010941 regulation of cell death; GO:0032872 regulation of stress-activated MAPK cascade; GO:0006266 DNA ligation; GO:0002292 T cell differentiation involved in immune response; GO:0009891 positive regulation of biosynthetic process; GO:0031347 regulation of defense response; GO:0006914 autophagy; GO:0044237 c…	GO:0034774 secretory granule lumen; GO:0016020 membrane; GO:0005615 extracellular space; GO:0044421 extracellular region part; GO:0031410 cytoplasmic vesicle; GO:0071944 cell periphery; GO:0031982 vesicle; GO:0005737 cytoplasm; GO:0044433 cytoplasmic vesicle part; GO:0044424 intracellular part; GO:0005623 cell; GO:1904813 ficolin-1-rich granule lumen; GO:0044422 organelle part; GO:0043228 non-mem…	GO:0005102 receptor binding; GO:0070182 DNA polymerase binding; GO:0003690 double-stranded DNA binding; GO:0019958 C-X-C chemokine binding; GO:0003697 single-stranded DNA binding; GO:0005515 protein binding; GO:0019956 chemokine binding; GO:0000217 DNA secondary structure binding; GO:0003700 transcription factor activity, sequence-specific DNA binding; GO:0001786 phosphatidylserine binding; GO:19…	K10802	HMGB1; high mobility group protein B1	hsa03410 Base excision repair - Homo sapiens (human); hsa04140 Autophagy - animal - Homo sapiens (human); hsa04217 Necroptosis - Homo sapiens (human);	IPR009071;	High mobility group box domain;
P35914	Hydroxymethylglutaryl-CoA lyase, mitochondrial OS=Homo sapiens OX=9606 GN=HMGCL PE=1 SV=2	0.649	Down	0.00020072	HMGCL	34.36	27.7	mitochondria	GO:0044085 cellular component biogenesis; GO:1901606 alpha-amino acid catabolic process; GO:0001101 response to acid chemical; GO:0048732 gland development; GO:0044699 single-organism process; GO:0009058 biosynthetic process; GO:0044237 cellular metabolic process; GO:0009605 response to external stimulus; GO:0008152 metabolic process; GO:0006520 cellular amino acid metabolic process; GO:0051262 p…	GO:0016020 membrane; GO:0005759 mitochondrial matrix; GO:0043229 intracellular organelle; GO:0044429 mitochondrial part; GO:0031090 organelle membrane; GO:0005777 peroxisome; GO:0031967 organelle envelope; GO:0005737 cytoplasm; GO:0044446 intracellular organelle part; GO:0044424 intracellular part; GO:0005623 cell; GO:0005739 mitochondrion; GO:0044422 organelle part; GO:0005740 mitochondrial enve…	GO:0000287 magnesium ion binding; GO:0005102 receptor binding; GO:0046983 protein dimerization activity; GO:0043167 ion binding; GO:0043177 organic acid binding; GO:0016829 lyase activity; GO:0005515 protein binding; GO:1901681 sulfur compound binding; GO:0048037 cofactor binding; GO:0030145 manganese ion binding; GO:0042802 identical protein binding; GO:0031406 carboxylic acid binding; GO:004691…	K01640	E4.1.3.4, HMGCL, hmgL; hydroxymethylglutaryl-CoA lyase [EC:4.1.3.4]	hsa00072 Synthesis and degradation of ketone bodies - Homo sapiens (human); hsa00280 Valine, leucine and isoleucine degradation - Homo sapiens (human); hsa00650 Butanoate metabolism - Homo sapiens (human); hsa01100 Metabolic pathways - Homo sapiens (human); hsa04146 Peroxisome - Homo sapiens (human);	IPR013785; IPR000891;	Aldolase-type TIM barrel; Pyruvate carboxyltransferase;
Q9NTK5	Obg-like ATPase 1 OS=Homo sapiens OX=9606 GN=OLA1 PE=1 SV=2	0.541	Down	0.0075165	OLA1	44.743	34.8	cytoplasm	GO:0009116 nucleoside metabolic process; GO:0042278 purine nucleoside metabolic process; GO:0006725 cellular aromatic compound metabolic process; GO:0009167 purine ribonucleoside monophosphate metabolic process; GO:0009259 ribonucleotide metabolic process; GO:0009117 nucleotide metabolic process; GO:0002576 platelet degranulation; GO:0044699 single-organism process; GO:0044237 cellular metabolic …	GO:0034774 secretory granule lumen; GO:0016020 membrane; GO:0044421 extracellular region part; GO:0031410 cytoplasmic vesicle; GO:0031982 vesicle; GO:0005737 cytoplasm; GO:0044433 cytoplasmic vesicle part; GO:0044424 intracellular part; GO:0005623 cell; GO:0044422 organelle part; GO:0043228 non-membrane-bounded organelle; GO:0005856 cytoskeleton; GO:0070062 extracellular exosome; GO:0031974 membr…	GO:1901265 nucleoside phosphate binding; GO:0016817 hydrolase activity, acting on acid anhydrides; GO:0005515 protein binding; GO:0016787 hydrolase activity; GO:0016887 ATPase activity; GO:0097159 organic cyclic compound binding; GO:1901363 heterocyclic compound binding; GO:0016462 pyrophosphatase activity; GO:0003824 catalytic activity; GO:0032553 ribonucleotide binding; GO:0005488 binding; GO:0…	K19788	OLA1; obg-like ATPase 1		IPR012676; IPR013029; IPR006073; IPR031167; IPR027417; IPR023192; IPR012675;	TGS-like; Domain of unknown function DUF933; GTP binding domain; OBG-type guanine nucleotide-binding (G) domain; P-loop containing nucleoside triphosphate hydrolase; TGS-like domain; Beta-grasp domain;
Q7L775	EPM2A-interacting protein 1 OS=Homo sapiens OX=9606 GN=EPM2AIP1 PE=1 SV=1	1.99	Up	9.6284e-05	EPM2AIP1	70.369	3.3	cytoplasm	GO:0043467 regulation of generation of precursor metabolites and energy; GO:0045913 positive regulation of carbohydrate metabolic process; GO:0050794 regulation of cellular process; GO:0043255 regulation of carbohydrate biosynthetic process; GO:0032885 regulation of polysaccharide biosynthetic process; GO:0060255 regulation of macromolecule metabolic process; GO:0019219 regulation of nucleobase-c…	GO:0043229 intracellular organelle; GO:0005783 endoplasmic reticulum; GO:0044446 intracellular organelle part; GO:0005737 cytoplasm; GO:0031981 nuclear lumen; GO:0012505 endomembrane system; GO:0044424 intracellular part; GO:0005623 cell; GO:0044422 organelle part; GO:0043231 intracellular membrane-bounded organelle; GO:0043226 organelle; GO:0031974 membrane-enclosed lumen; GO:0005634 nucleus; GO…	GO:0097159 organic cyclic compound binding; GO:1901363 heterocyclic compound binding; GO:0000981 RNA polymerase II transcription factor activity, sequence-specific DNA binding; GO:0003677 DNA binding; GO:0042802 identical protein binding; GO:0005488 binding; GO:0001071 nucleic acid binding transcription factor activity; GO:0003676 nucleic acid binding; GO:0005515 protein binding; GO:0003700 trans…
P61604	10 kDa heat shock protein, mitochondrial OS=Homo sapiens OX=9606 GN=HSPE1 PE=1 SV=2	0.471	Down	0.00033554	HSPE1	10.932	81.4	mitochondria	GO:0050794 regulation of cellular process; GO:0001649 osteoblast differentiation; GO:0044707 single-multicellular organism process; GO:0010941 regulation of cell death; GO:0032270 positive regulation of cellular protein metabolic process; GO:2001056 positive regulation of cysteine-type endopeptidase activity; GO:0060255 regulation of macromolecule metabolic process; GO:0061077 chaperone-mediated …	GO:0005759 mitochondrial matrix; GO:0043229 intracellular organelle; GO:0016020 membrane; GO:0044421 extracellular region part; GO:0044429 mitochondrial part; GO:0031982 vesicle; GO:0005737 cytoplasm; GO:0044446 intracellular organelle part; GO:0044424 intracellular part; GO:0005623 cell; GO:0005576 extracellular region; GO:0005739 mitochondrion; GO:0044422 organelle part; GO:0070062 extracellula…	GO:0003723 RNA binding; GO:0005524 ATP binding; GO:1901265 nucleoside phosphate binding; GO:0051087 chaperone binding; GO:0001882 nucleoside binding; GO:0043167 ion binding; GO:0005515 protein binding; GO:0000166 nucleotide binding; GO:1901363 heterocyclic compound binding; GO:0097159 organic cyclic compound binding; GO:0032549 ribonucleoside binding; GO:0097367 carbohydrate derivative binding; G…	K04078	groES, HSPE1; chaperonin GroES		IPR011032;	GroES-like;
Q5BJH7	Protein YIF1B OS=Homo sapiens OX=9606 GN=YIF1B PE=1 SV=1	1.758	Up	0.00072128	YIF1B	34.435	12.1	plasma membrane	GO:0006810 transport; GO:0046907 intracellular transport; GO:0051649 establishment of localization in cell; GO:0016192 vesicle-mediated transport; GO:0048193 Golgi vesicle transport; GO:0051179 localization; GO:0006888 ER to Golgi vesicle-mediated transport; GO:0051641 cellular localization; GO:0051234 establishment of localization;	GO:0016020 membrane; GO:0005783 endoplasmic reticulum; GO:0042175 nuclear outer membrane-endoplasmic reticulum membrane network; GO:0031090 organelle membrane; GO:0031410 cytoplasmic vesicle; GO:0005737 cytoplasm; GO:0031982 vesicle; GO:0031224 intrinsic component of membrane; GO:0044424 intracellular part; GO:0030173 integral component of Golgi membrane; GO:0005623 cell; GO:0044422 organelle par…		K20362	YIF1; protein transport protein YIF1
Q6PI78	Transmembrane protein 65 OS=Homo sapiens OX=9606 GN=TMEM65 PE=1 SV=2	2.234	Up	0.0057827	TMEM65	25.498	8.8	plasma membrane	GO:0032502 developmental process; GO:0072359 circulatory system development; GO:0044707 single-multicellular organism process; GO:0048731 system development; GO:1903522 regulation of blood circulation; GO:0023051 regulation of signaling; GO:0044699 single-organism process; GO:0008016 regulation of heart contraction; GO:0032501 multicellular organismal process; GO:0051239 regulation of multicellul…	GO:0043229 intracellular organelle; GO:0016020 membrane; GO:0071944 cell periphery; GO:0030054 cell junction; GO:0044291 cell-cell contact zone; GO:0005737 cytoplasm; GO:0031224 intrinsic component of membrane; GO:0044424 intracellular part; GO:0005623 cell; GO:0005911 cell-cell junction; GO:0016021 integral component of membrane; GO:0005739 mitochondrion; GO:0014704 intercalated disc; GO:0005886…
Q9Y2S6	Translation machinery-associated protein 7 OS=Homo sapiens OX=9606 GN=TMA7 PE=1 SV=1	0.56	Down	0.0068965	TMA7	7.0662	29.7	nucleus
Q86TG7	Retrotransposon-derived protein PEG10 OS=Homo sapiens OX=9606 GN=PEG10 PE=1 SV=2	2.233	Up	2.4746e-05	PEG10	80.172	1.1	cytoplasm	GO:0050794 regulation of cellular process; GO:0032502 developmental process; GO:0009968 negative regulation of signal transduction; GO:0017015 regulation of transforming growth factor beta receptor signaling pathway; GO:0023051 regulation of signaling; GO:0048869 cellular developmental process; GO:0044763 single-organism cellular process; GO:0044699 single-organism process; GO:0090287 regulation …	GO:0043226 organelle; GO:0043231 intracellular membrane-bounded organelle; GO:0043229 intracellular organelle; GO:0005634 nucleus; GO:0044464 cell part; GO:0005622 intracellular; GO:0005737 cytoplasm; GO:0044424 intracellular part; GO:0005829 cytosol; GO:0043227 membrane-bounded organelle; GO:0005623 cell; GO:0044444 cytoplasmic part;	GO:0097159 organic cyclic compound binding; GO:1901363 heterocyclic compound binding; GO:0003677 DNA binding; GO:0003723 RNA binding; GO:0046914 transition metal ion binding; GO:0005488 binding; GO:0043167 ion binding; GO:0003676 nucleic acid binding; GO:0046872 metal ion binding; GO:0043169 cation binding; GO:0005515 protein binding; GO:0008270 zinc ion binding;				IPR021109; IPR001878; IPR032549;	Aspartic peptidase domain; Zinc finger, CCHC-type; Domain of unknown function DUF4939;
Q8TB05	UBA-like domain-containing protein 1 OS=Homo sapiens OX=9606 GN=UBALD1 PE=2 SV=1	3.41	Up	0.00146104	UBALD1	18.954	5.1	nucleus			GO:0005515 protein binding; GO:0005488 binding;				IPR009060;	UBA-like;
Q7Z422	SUZ domain-containing protein 1 OS=Homo sapiens OX=9606 GN=SZRD1 PE=1 SV=1	2.526	Up	0.0023385	SZRD1	16.997	19.1	cytoplasm							IPR024642; IPR024771;	SUZ-C domain; SUZ domain;
Q6UW68	Transmembrane protein 205 OS=Homo sapiens OX=9606 GN=TMEM205 PE=1 SV=1	1.974	Up	0.0081391	TMEM205	21.198	20.6	extracellular		GO:0016020 membrane; GO:0070062 extracellular exosome; GO:0043226 organelle; GO:0044421 extracellular region part; GO:0044425 membrane part; GO:0031982 vesicle; GO:1903561 extracellular vesicle; GO:0031224 intrinsic component of membrane; GO:0043227 membrane-bounded organelle; GO:0016021 integral component of membrane; GO:0005576 extracellular region; GO:0043230 extracellular organelle;					IPR025423;	Domain of unknown function DUF4149;
Q9Y2D4	Exocyst complex component 6B OS=Homo sapiens OX=9606 GN=EXOC6B PE=1 SV=3	1.585	Up	0.047477	EXOC6B	94.2	8.4	cytoplasm,nucleus	GO:0006904 vesicle docking involved in exocytosis; GO:0016192 vesicle-mediated transport; GO:0044763 single-organism cellular process; GO:0044699 single-organism process; GO:0071702 organic substance transport; GO:0048278 vesicle docking; GO:0022406 membrane docking; GO:0015031 protein transport; GO:0051234 establishment of localization; GO:0045184 establishment of protein localization; GO:000681…	GO:0005938 cell cortex; GO:0044464 cell part; GO:0044448 cell cortex part; GO:0005622 intracellular; GO:0071944 cell periphery; GO:0005737 cytoplasm; GO:0099568 cytoplasmic region; GO:0032991 macromolecular complex; GO:0044424 intracellular part; GO:0000145 exocyst; GO:0043234 protein complex; GO:0005623 cell; GO:0044444 cytoplasmic part; GO:0099023 tethering complex;	GO:0005515 protein binding; GO:0005488 binding;	K19985	EXOC6, SEC15; exocyst complex component 6
Q96S59	Ran-binding protein 9 OS=Homo sapiens OX=9606 GN=RANBP9 PE=1 SV=1	3.398	Up	0.00137646	RANBP9	77.846	3.7	cytoplasm,nucleus	GO:0044085 cellular component biogenesis; GO:0044700 single organism signaling; GO:0031109 microtubule polymerization or depolymerization; GO:0032989 cellular component morphogenesis; GO:0044237 cellular metabolic process; GO:0009605 response to external stimulus; GO:0008152 metabolic process; GO:0065003 macromolecular complex assembly; GO:0044093 positive regulation of molecular function; GO:004…	GO:0043229 intracellular organelle; GO:0016020 membrane; GO:0043232 intracellular non-membrane-bounded organelle; GO:0071944 cell periphery; GO:0044430 cytoskeletal part; GO:0044446 intracellular organelle part; GO:0005737 cytoplasm; GO:0032991 macromolecular complex; GO:0044424 intracellular part; GO:0005875 microtubule associated complex; GO:0005829 cytosol; GO:0005623 cell; GO:0044422 organell…	GO:0031267 small GTPase binding; GO:0005085 guanyl-nucleotide exchange factor activity; GO:0017016 Ras GTPase binding; GO:0005488 binding; GO:0005088 Ras guanyl-nucleotide exchange factor activity; GO:0005515 protein binding; GO:0008536 Ran GTPase binding; GO:0098772 molecular function regulator; GO:0051020 GTPase binding; GO:0019899 enzyme binding;	K23334			IPR024964; IPR001870; IPR006595; IPR006594; IPR013144; IPR013320; IPR003877;	CTLH/CRA C-terminal to LisH motif domain; B30.2/SPRY domain; CTLH, C-terminal LisH motif; LIS1 homology motif; CRA domain; Concanavalin A-like lectin/glucanase domain; SPRY domain;
Q9UBP4	Dickkopf-related protein 3 OS=Homo sapiens OX=9606 GN=DKK3 PE=1 SV=2	4.239	Up	0.000118342	DKK3	38.39	13.7	extracellular	GO:0044700 single organism signaling; GO:0065008 regulation of biological quality; GO:0032353 negative regulation of hormone biosynthetic process; GO:0048732 gland development; GO:0009968 negative regulation of signal transduction; GO:0007166 cell surface receptor signaling pathway; GO:0090030 regulation of steroid hormone biosynthetic process; GO:0023051 regulation of signaling; GO:0090090 negat…	GO:0005615 extracellular space; GO:0044421 extracellular region part; GO:0005576 extracellular region;					IPR006796;	Dickkopf, N-terminal cysteine-rich;
P06703	Protein S100-A6 OS=Homo sapiens OX=9606 GN=S100A6 PE=1 SV=1	0.414	Down	0.00169834	S100A6	10.18	41.1	cytoplasm	GO:0050794 regulation of cellular process; GO:0044700 single organism signaling; GO:0016043 cellular component organization; GO:0044707 single-multicellular organism process; GO:0034220 ion transmembrane transport; GO:0042127 regulation of cell proliferation; GO:0048869 cellular developmental process; GO:0048666 neuron development; GO:0032989 cellular component morphogenesis; GO:0022008 neurogene…	GO:0016020 membrane; GO:0044421 extracellular region part; GO:0019898 extrinsic component of membrane; GO:0071944 cell periphery; GO:0031982 vesicle; GO:0005737 cytoplasm; GO:0044424 intracellular part; GO:0031234 extrinsic component of cytoplasmic side of plasma membrane; GO:0005623 cell; GO:0009898 cytoplasmic side of plasma membrane; GO:0098562 cytoplasmic side of membrane; GO:0044422 organell…	GO:0015075 ion transmembrane transporter activity; GO:0046983 protein dimerization activity; GO:0043167 ion binding; GO:0022892 substrate-specific transporter activity; GO:0005515 protein binding; GO:0005523 tropomyosin binding; GO:0008270 zinc ion binding; GO:0048306 calcium-dependent protein binding; GO:0022891 substrate-specific transmembrane transporter activity; GO:0008092 cytoskeletal prote…				IPR011992; IPR002048; IPR013787;	EF-hand domain pair; EF-hand domain; S100/CaBP-9k-type, calcium binding, subdomain;
P48506	Glutamate--cysteine ligase catalytic subunit OS=Homo sapiens OX=9606 GN=GCLC PE=1 SV=2	2.517	Up	0.00164465	GCLC	72.765	8.2	cytoplasm	GO:0010941 regulation of cell death; GO:0065008 regulation of biological quality; GO:0006518 peptide metabolic process; GO:0032270 positive regulation of cellular protein metabolic process; GO:0032436 positive regulation of proteasomal ubiquitin-dependent protein catabolic process; GO:0042593 glucose homeostasis; GO:0043523 regulation of neuron apoptotic process; GO:0042398 cellular modified amin…	GO:1902494 catalytic complex; GO:0044464 cell part; GO:0005622 intracellular; GO:0017109 glutamate-cysteine ligase complex; GO:0005737 cytoplasm; GO:0032991 macromolecular complex; GO:0044424 intracellular part; GO:0005829 cytosol; GO:0005623 cell; GO:0044444 cytoplasmic part;	GO:0016597 amino acid binding; GO:1901265 nucleoside phosphate binding; GO:0046983 protein dimerization activity; GO:0016874 ligase activity; GO:0005515 protein binding; GO:0097159 organic cyclic compound binding; GO:1901363 heterocyclic compound binding; GO:0031406 carboxylic acid binding; GO:0003824 catalytic activity; GO:0032553 ribonucleotide binding; GO:0005488 binding; GO:0032550 purine rib…	K11204	GCLC; glutamate--cysteine ligase catalytic subunit [EC:6.3.2.2]	hsa00270 Cysteine and methionine metabolism - Homo sapiens (human); hsa00480 Glutathione metabolism - Homo sapiens (human); hsa01100 Metabolic pathways - Homo sapiens (human); hsa04216 Ferroptosis - Homo sapiens (human);
P46778	60S ribosomal protein L21 OS=Homo sapiens OX=9606 GN=RPL21 PE=1 SV=2	0.563	Down	0.02066	RPL21	18.565	38.1	nucleus	GO:0044085 cellular component biogenesis; GO:0022613 ribonucleoprotein complex biogenesis; GO:0006518 peptide metabolic process; GO:0072594 establishment of protein localization to organelle; GO:0009058 biosynthetic process; GO:0044764 multi-organism cellular process; GO:0044237 cellular metabolic process; GO:0015031 protein transport; GO:0051234 establishment of localization; GO:0006605 protein …	GO:0005840 ribosome; GO:0043229 intracellular organelle; GO:0016020 membrane; GO:0043232 intracellular non-membrane-bounded organelle; GO:0022625 cytosolic large ribosomal subunit; GO:0044446 intracellular organelle part; GO:0005737 cytoplasm; GO:0032991 macromolecular complex; GO:0044424 intracellular part; GO:0005829 cytosol; GO:0005623 cell; GO:0044422 organelle part; GO:0043228 non-membrane-b…	GO:0097159 organic cyclic compound binding; GO:1901363 heterocyclic compound binding; GO:0003723 RNA binding; GO:0005488 binding; GO:0003676 nucleic acid binding; GO:0005515 protein binding; GO:0005198 structural molecule activity; GO:0003735 structural constituent of ribosome;	K02889	RP-L21e, RPL21; large subunit ribosomal protein L21e	hsa03010 Ribosome - Homo sapiens (human);	IPR008991;	Translation protein SH3-like domain;
Q92769	Histone deacetylase 2 OS=Homo sapiens OX=9606 GN=HDAC2 PE=1 SV=2	1.615	Up	4.0862e-05	HDAC2	55.364	20.1	cytoplasm	GO:0035094 response to nicotine; GO:0010941 regulation of cell death; GO:2000171 negative regulation of dendrite development; GO:0014013 regulation of gliogenesis; GO:0032680 regulation of tumor necrosis factor production; GO:0009891 positive regulation of biosynthetic process; GO:0044237 cellular metabolic process; GO:0009607 response to biotic stimulus; GO:0009913 epidermal cell differentiation…	GO:0005737 cytoplasm; GO:0032991 macromolecular complex; GO:0017053 transcriptional repressor complex; GO:0044424 intracellular part; GO:0070603 SWI/SNF superfamily-type complex; GO:0005623 cell; GO:0000118 histone deacetylase complex; GO:0044422 organelle part; GO:0090568 nuclear transcriptional repressor complex; GO:0044427 chromosomal part; GO:0043228 non-membrane-bounded organelle; GO:0031974…	GO:0032041 NAD-dependent histone deacetylase activity (H3-K14 specific); GO:0016787 hydrolase activity; GO:0005515 protein binding; GO:0003682 chromatin binding; GO:0001047 core promoter binding; GO:0000975 regulatory region DNA binding; GO:1901363 heterocyclic compound binding; GO:0097159 organic cyclic compound binding; GO:0070491 repressing transcription factor binding; GO:0003824 catalytic ac…	K06067	HDAC1_2; histone deacetylase 1/2 [EC:3.5.1.98]	hsa04110 Cell cycle - Homo sapiens (human); hsa04213 Longevity regulating pathway - multiple species - Homo sapiens (human); hsa04330 Notch signaling pathway - Homo sapiens (human); hsa04919 Thyroid hormone signaling pathway - Homo sapiens (human); hsa05016 Huntington disease - Homo sapiens (human); hsa05034 Alcoholism - Homo sapiens (human); hsa05165 Human papillomavirus infection - Homo sapiens…	IPR023801;	Histone deacetylase domain;
Q9Y2W1	Thyroid hormone receptor-associated protein 3 OS=Homo sapiens OX=9606 GN=THRAP3 PE=1 SV=2	0.355	Down	0.020536	THRAP3	108.66	20.2	nucleus	GO:0044700 single organism signaling; GO:0065008 regulation of biological quality; GO:0000381 regulation of alternative mRNA splicing, via spliceosome; GO:0010608 posttranscriptional regulation of gene expression; GO:0043489 RNA stabilization; GO:0097659 nucleic acid-templated transcription; GO:0009891 positive regulation of biosynthetic process; GO:0044237 cellular metabolic process; GO:0008152 …	GO:0043229 intracellular organelle; GO:0044421 extracellular region part; GO:0044446 intracellular organelle part; GO:0031982 vesicle; GO:0032991 macromolecular complex; GO:0031981 nuclear lumen; GO:0044424 intracellular part; GO:0016604 nuclear body; GO:0005623 cell; GO:0005576 extracellular region; GO:0044422 organelle part; GO:0031974 membrane-enclosed lumen; GO:0043226 organelle; GO:0070062 e…	GO:0046966 thyroid hormone receptor binding; GO:1901265 nucleoside phosphate binding; GO:0005102 receptor binding; GO:0003690 double-stranded DNA binding; GO:0005515 protein binding; GO:0051427 hormone receptor binding; GO:0001047 core promoter binding; GO:1901363 heterocyclic compound binding; GO:0000975 regulatory region DNA binding; GO:0097159 organic cyclic compound binding; GO:0001046 core p…	K13112	THRAP3; thyroid hormone receptor-associated protein 3
Q9BX70	BTB/POZ domain-containing protein 2 OS=Homo sapiens OX=9606 GN=BTBD2 PE=1 SV=1	1.651	Up	0.036685	BTBD2	55.931	5	nucleus	GO:0044707 single-multicellular organism process; GO:0051603 proteolysis involved in cellular protein catabolic process; GO:0044257 cellular protein catabolic process; GO:0060255 regulation of macromolecule metabolic process; GO:0048869 cellular developmental process; GO:0044267 cellular protein metabolic process; GO:0044699 single-organism process; GO:0022008 neurogenesis; GO:0044237 cellular me…	GO:0043229 intracellular organelle; GO:0043232 intracellular non-membrane-bounded organelle; GO:0000932 P-body; GO:0005737 cytoplasm; GO:0019005 SCF ubiquitin ligase complex; GO:0031461 cullin-RING ubiquitin ligase complex; GO:0032991 macromolecular complex; GO:0044424 intracellular part; GO:1990234 transferase complex; GO:0005829 cytosol; GO:0005623 cell; GO:0036464 cytoplasmic ribonucleoprotein…	GO:0005515 protein binding; GO:0031625 ubiquitin protein ligase binding; GO:0044389 ubiquitin-like protein ligase binding; GO:0005488 binding; GO:0019899 enzyme binding;	K10477	BTBD1_2; BTB/POZ domain-containing protein 1/2		IPR011333; IPR011705; IPR000210; IPR012983;	SKP1/BTB/POZ domain; BTB/Kelch-associated; BTB/POZ domain; PHR;
P18858	DNA ligase 1 OS=Homo sapiens OX=9606 GN=LIG1 PE=1 SV=1	0.331	Down	0.00053642	LIG1	101.73	2.2	nucleus	GO:0033554 cellular response to stress; GO:0006260 DNA replication; GO:0006266 DNA ligation; GO:0006283 transcription-coupled nucleotide-excision repair; GO:0006725 cellular aromatic compound metabolic process; GO:0006259 DNA metabolic process; GO:0006289 nucleotide-excision repair; GO:0044699 single-organism process; GO:0009058 biosynthetic process; GO:0050896 response to stimulus; GO:1903047 mi…	GO:0043229 intracellular organelle; GO:0044446 intracellular organelle part; GO:0005737 cytoplasm; GO:0031981 nuclear lumen; GO:0044424 intracellular part; GO:0005623 cell; GO:0044422 organelle part; GO:0005739 mitochondrion; GO:0031974 membrane-enclosed lumen; GO:0043231 intracellular membrane-bounded organelle; GO:0043226 organelle; GO:0005654 nucleoplasm; GO:0005634 nucleus; GO:0070013 intrace…	GO:0003677 DNA binding; GO:0005524 ATP binding; GO:0003910 DNA ligase (ATP) activity; GO:1901265 nucleoside phosphate binding; GO:0016874 ligase activity; GO:0001882 nucleoside binding; GO:0043167 ion binding; GO:0016886 ligase activity, forming phosphoric ester bonds; GO:0003909 DNA ligase activity; GO:0000166 nucleotide binding; GO:1901363 heterocyclic compound binding; GO:0097159 organic cycli…	K10747	LIG1; DNA ligase 1 [EC:6.5.1.1 6.5.1.6 6.5.1.7]	hsa03030 DNA replication - Homo sapiens (human); hsa03410 Base excision repair - Homo sapiens (human); hsa03420 Nucleotide excision repair - Homo sapiens (human); hsa03430 Mismatch repair - Homo sapiens (human);	IPR012340; IPR012308; IPR012310; IPR012309;	Nucleic acid-binding, OB-fold; DNA ligase, ATP-dependent, N-terminal; DNA ligase, ATP-dependent, central; DNA ligase, ATP-dependent, C-terminal;
O75298	Reticulon-2 OS=Homo sapiens OX=9606 GN=RTN2 PE=1 SV=1	1.974	Up	0.0040222	RTN2	59.263	3.3	plasma membrane	GO:0046907 intracellular transport; GO:0051049 regulation of transport; GO:0071806 protein transmembrane transport; GO:0071702 organic substance transport; GO:0015031 protein transport; GO:0051641 cellular localization; GO:0051234 establishment of localization; GO:0045184 establishment of protein localization; GO:0006810 transport; GO:0055085 transmembrane transport; GO:0070727 cellular macromole…	GO:0016020 membrane; GO:0042175 nuclear outer membrane-endoplasmic reticulum membrane network; GO:0005783 endoplasmic reticulum; GO:0071944 cell periphery; GO:0005737 cytoplasm; GO:0031224 intrinsic component of membrane; GO:0044424 intracellular part; GO:0016528 sarcoplasm; GO:0005623 cell; GO:0044422 organelle part; GO:0030315 T-tubule; GO:0098827 endoplasmic reticulum subcompartment; GO:001480…	GO:0005515 protein binding; GO:0005488 binding;	K20722	RTN2; reticulon-2		IPR003388;	Reticulon;
Q3B726	DNA-directed RNA polymerase I subunit RPA43 OS=Homo sapiens OX=9606 GN=TWISTNB PE=1 SV=1	0.565	Down	0.00092201	TWISTNB	37.432	2.1	nucleus	GO:0006361 transcription initiation from RNA polymerase I promoter; GO:0006725 cellular aromatic compound metabolic process; GO:0006360 transcription from RNA polymerase I promoter; GO:0060255 regulation of macromolecule metabolic process; GO:0097659 nucleic acid-templated transcription; GO:0006352 DNA-templated transcription, initiation; GO:0006362 transcription elongation from RNA polymerase I …	GO:0043229 intracellular organelle; GO:0000428 DNA-directed RNA polymerase complex; GO:0055029 nuclear DNA-directed RNA polymerase complex; GO:0061695 transferase complex, transferring phosphorus-containing groups; GO:0043232 intracellular non-membrane-bounded organelle; GO:0044446 intracellular organelle part; GO:0030880 RNA polymerase complex; GO:0032991 macromolecular complex; GO:0031981 nucle…	GO:0003899 DNA-directed 5'-3' RNA polymerase activity; GO:0016779 nucleotidyltransferase activity; GO:0034062 5'-3' RNA polymerase activity; GO:0016740 transferase activity; GO:0003824 catalytic activity; GO:0097747 RNA polymerase activity; GO:0016772 transferase activity, transferring phosphorus-containing groups;	K03004	RPA43; DNA-directed RNA polymerase I subunit RPA43	hsa03020 RNA polymerase - Homo sapiens (human);	IPR005576;	RNA polymerase Rpb7, N-terminal;
Q9H1C3	Glycosyltransferase 8 domain-containing protein 2 OS=Homo sapiens OX=9606 GN=GLT8D2 PE=2 SV=1	2.217	Up	0.00100357	GLT8D2	40.026	2.9	endoplasmic reticulum	GO:0044723 single-organism carbohydrate metabolic process; GO:0008152 metabolic process; GO:0016051 carbohydrate biosynthetic process; GO:0044711 single-organism biosynthetic process; GO:0000271 polysaccharide biosynthetic process; GO:0044710 single-organism metabolic process; GO:0005976 polysaccharide metabolic process; GO:0044699 single-organism process; GO:0009058 biosynthetic process; GO:0043…	GO:0043229 intracellular organelle; GO:0016020 membrane; GO:0005737 cytoplasm; GO:0031224 intrinsic component of membrane; GO:0012505 endomembrane system; GO:0044424 intracellular part; GO:0005623 cell; GO:0016021 integral component of membrane; GO:0043231 intracellular membrane-bounded organelle; GO:0043226 organelle; GO:0005622 intracellular; GO:0044464 cell part; GO:0044425 membrane part; GO:0…	GO:0016757 transferase activity, transferring glycosyl groups; GO:0003824 catalytic activity; GO:0016740 transferase activity;				IPR029044;	Nucleotide-diphospho-sugar transferases;
Q9P287	BRCA2 and CDKN1A-interacting protein OS=Homo sapiens OX=9606 GN=BCCIP PE=1 SV=1	0.658	Down	0.0057554	BCCIP	35.979	18.8	nucleus	GO:0045859 regulation of protein kinase activity; GO:0050794 regulation of cellular process; GO:0033554 cellular response to stress; GO:0061101 neuroendocrine cell differentiation; GO:0006725 cellular aromatic compound metabolic process; GO:0060255 regulation of macromolecule metabolic process; GO:0006259 DNA metabolic process; GO:0031399 regulation of protein modification process; GO:0048869 cel…	GO:0043229 intracellular organelle; GO:0061695 transferase complex, transferring phosphorus-containing groups; GO:0005737 cytoplasm; GO:0044446 intracellular organelle part; GO:0031981 nuclear lumen; GO:0032991 macromolecular complex; GO:0000307 cyclin-dependent protein kinase holoenzyme complex; GO:0044424 intracellular part; GO:1902554 serine/threonine protein kinase complex; GO:1990234 transfe…	GO:0097159 organic cyclic compound binding; GO:1901363 heterocyclic compound binding; GO:0003723 RNA binding; GO:0030234 enzyme regulator activity; GO:0005488 binding; GO:0003676 nucleic acid binding; GO:0005515 protein binding; GO:0019207 kinase regulator activity; GO:0098772 molecular function regulator;	K15262	BCP1, BCCIP; protein BCP1
Q8IXM6	Nurim OS=Homo sapiens OX=9606 GN=NRM PE=1 SV=1	2.231	Up	0.00022188	NRM	29.379	7.6	plasma membrane		GO:0043229 intracellular organelle; GO:0016020 membrane; GO:0031090 organelle membrane; GO:0005635 nuclear envelope; GO:0044446 intracellular organelle part; GO:0031967 organelle envelope; GO:0031224 intrinsic component of membrane; GO:0012505 endomembrane system; GO:0044424 intracellular part; GO:0005623 cell; GO:0016021 integral component of membrane; GO:0044422 organelle part; GO:0043226 organ…	GO:0005515 protein binding; GO:0005488 binding;
O94829	Importin-13 OS=Homo sapiens OX=9606 GN=IPO13 PE=1 SV=3	2.578	Up	0.00053997	IPO13	108.19	6.7	plasma membrane	GO:0046907 intracellular transport; GO:0072594 establishment of protein localization to organelle; GO:0017038 protein import; GO:1902593 single-organism nuclear import; GO:0044699 single-organism process; GO:0051169 nuclear transport; GO:0071702 organic substance transport; GO:1902582 single-organism intracellular transport; GO:0015031 protein transport; GO:0051641 cellular localization; GO:00512…	GO:0016020 membrane; GO:0043229 intracellular organelle; GO:0031090 organelle membrane; GO:0005635 nuclear envelope; GO:0005737 cytoplasm; GO:0044446 intracellular organelle part; GO:0031967 organelle envelope; GO:0012505 endomembrane system; GO:0044424 intracellular part; GO:0005623 cell; GO:0044422 organelle part; GO:0043226 organelle; GO:0043231 intracellular membrane-bounded organelle; GO:003…	GO:0031267 small GTPase binding; GO:0005048 signal sequence binding; GO:0008565 protein transporter activity; GO:0017016 Ras GTPase binding; GO:0042277 peptide binding; GO:0005488 binding; GO:0008139 nuclear localization sequence binding; GO:0022892 substrate-specific transporter activity; GO:0008536 Ran GTPase binding; GO:0005515 protein binding; GO:0033218 amide binding; GO:0051020 GTPase bindi…				IPR001494; IPR011989; IPR013598; IPR016024;	Importin-beta, N-terminal domain; Armadillo-like helical; Exportin-1/Importin-beta-like; Armadillo-type fold;
Q96PU5	E3 ubiquitin-protein ligase NEDD4-like OS=Homo sapiens OX=9606 GN=NEDD4L PE=1 SV=2	1.795	Up	0.00135903	NEDD4L	111.93	4.9	cytoplasm,nucleus	GO:0060627 regulation of vesicle-mediated transport; GO:0065008 regulation of biological quality; GO:2001286 regulation of caveolin-mediated endocytosis; GO:1901017 negative regulation of potassium ion transmembrane transporter activity; GO:0030004 cellular monovalent inorganic cation homeostasis; GO:0010766 negative regulation of sodium ion transport; GO:1902306 negative regulation of sodium ion…	GO:0043229 intracellular organelle; GO:0044421 extracellular region part; GO:0044446 intracellular organelle part; GO:0031982 vesicle; GO:0005737 cytoplasm; GO:0031981 nuclear lumen; GO:0044424 intracellular part; GO:0005829 cytosol; GO:0005623 cell; GO:0005576 extracellular region; GO:0044422 organelle part; GO:0031974 membrane-enclosed lumen; GO:0043231 intracellular membrane-bounded organelle;…	GO:0008200 ion channel inhibitor activity; GO:0019787 ubiquitin-like protein transferase activity; GO:0019871 sodium channel inhibitor activity; GO:0099106 ion channel regulator activity; GO:0019870 potassium channel inhibitor activity; GO:0005515 protein binding; GO:0017080 sodium channel regulator activity; GO:0098772 molecular function regulator; GO:0016248 channel inhibitor activity; GO:00154…	K13305	NEDD4L; E3 ubiquitin-protein ligase NEDD4-like [EC:2.3.2.26]	hsa04120 Ubiquitin mediated proteolysis - Homo sapiens (human); hsa04144 Endocytosis - Homo sapiens (human); hsa04530 Tight junction - Homo sapiens (human); hsa04960 Aldosterone-regulated sodium reabsorption - Homo sapiens (human);	IPR001202; IPR000569; IPR000008;	WW domain; HECT domain; C2 domain;
Q08AF3	Schlafen family member 5 OS=Homo sapiens OX=9606 GN=SLFN5 PE=1 SV=1	1.809	Up	0.00033612	SLFN5	101.05	15.6	cytoplasm	GO:0032502 developmental process; GO:0030154 cell differentiation; GO:0044767 single-organism developmental process; GO:0048869 cellular developmental process; GO:0044763 single-organism cellular process; GO:0044699 single-organism process; GO:0009987 cellular process;	GO:0043226 organelle; GO:0043231 intracellular membrane-bounded organelle; GO:0043229 intracellular organelle; GO:0005634 nucleus; GO:0044464 cell part; GO:0005622 intracellular; GO:0044424 intracellular part; GO:0043227 membrane-bounded organelle; GO:0005623 cell;	GO:0005524 ATP binding; GO:1901265 nucleoside phosphate binding; GO:0001882 nucleoside binding; GO:0043167 ion binding; GO:0000166 nucleotide binding; GO:0097159 organic cyclic compound binding; GO:1901363 heterocyclic compound binding; GO:0032549 ribonucleoside binding; GO:0097367 carbohydrate derivative binding; GO:0032553 ribonucleotide binding; GO:0005488 binding; GO:0032550 purine ribonucleo…				IPR007421; IPR027417; IPR018647;	Schlafen, AAA domain; P-loop containing nucleoside triphosphate hydrolase; Domain of unknown function DUF2075;
Q53H96	Pyrroline-5-carboxylate reductase 3 OS=Homo sapiens OX=9606 GN=PYCR3 PE=1 SV=3	2.179	Up	6.2616e-05	PYCR3	28.663	18.2	extracellular	GO:0055129 L-proline biosynthetic process; GO:0016053 organic acid biosynthetic process; GO:0044699 single-organism process; GO:0009058 biosynthetic process; GO:1901566 organonitrogen compound biosynthetic process; GO:0044237 cellular metabolic process; GO:0009084 glutamine family amino acid biosynthetic process; GO:0071704 organic substance metabolic process; GO:0008152 metabolic process; GO:000…	GO:0044464 cell part; GO:0005622 intracellular; GO:0005737 cytoplasm; GO:0044424 intracellular part; GO:0005623 cell; GO:0005829 cytosol; GO:0044444 cytoplasmic part;	GO:0016645 oxidoreductase activity, acting on the CH-NH group of donors; GO:0016646 oxidoreductase activity, acting on the CH-NH group of donors, NAD or NADP as acceptor; GO:0003824 catalytic activity; GO:0005488 binding; GO:0004735 pyrroline-5-carboxylate reductase activity; GO:0005515 protein binding; GO:0016491 oxidoreductase activity;	K00286	proC; pyrroline-5-carboxylate reductase [EC:1.5.1.2]	hsa00330 Arginine and proline metabolism - Homo sapiens (human); hsa01100 Metabolic pathways - Homo sapiens (human); hsa01230 Biosynthesis of amino acids - Homo sapiens (human);	IPR028939; IPR008927; IPR016040; IPR029036;	Pyrroline-5-carboxylate reductase, catalytic, N-terminal; 6-phosphogluconate dehydrogenase C-terminal domain-like; NAD(P)-binding domain; Pyrroline-5-carboxylate reductase, dimerisation domain;
Q06481	Amyloid-like protein 2 OS=Homo sapiens OX=9606 GN=APLP2 PE=1 SV=2	5.163	Up	1.4875e-06	APLP2	86.955	1.3	peroxisome	GO:0044700 single organism signaling; GO:0050794 regulation of cellular process; GO:0010951 negative regulation of endopeptidase activity; GO:0060255 regulation of macromolecule metabolic process; GO:0002576 platelet degranulation; GO:0044699 single-organism process; GO:0031324 negative regulation of cellular metabolic process; GO:0048523 negative regulation of cellular process; GO:0048519 negati…	GO:0016020 membrane; GO:0044421 extracellular region part; GO:0031090 organelle membrane; GO:0031410 cytoplasmic vesicle; GO:0071944 cell periphery; GO:0005737 cytoplasm; GO:0031982 vesicle; GO:0044433 cytoplasmic vesicle part; GO:0031224 intrinsic component of membrane; GO:0044424 intracellular part; GO:0005623 cell; GO:0044422 organelle part; GO:0070062 extracellular exosome; GO:0005622 intrace…	GO:0003677 DNA binding; GO:0061134 peptidase regulator activity; GO:0043167 ion binding; GO:0005515 protein binding; GO:0004857 enzyme inhibitor activity; GO:0098772 molecular function regulator; GO:0008201 heparin binding; GO:0004866 endopeptidase inhibitor activity; GO:1901681 sulfur compound binding; GO:1901363 heterocyclic compound binding; GO:0097159 organic cyclic compound binding; GO:00973…	K08117	APLP2; amyloid-like protein 2		IPR024329; IPR008154; IPR019543; IPR011178; IPR002223; IPR015849;	Amyloidogenic glycoprotein, E2 domain; Amyloidogenic glycoprotein, extracellular; Beta-amyloid precursor protein C-terminal; Amyloidogenic glycoprotein, copper-binding; Pancreatic trypsin inhibitor Kunitz domain; Amyloidogenic glycoprotein, heparin-binding;
Q86WA6	Valacyclovir hydrolase OS=Homo sapiens OX=9606 GN=BPHL PE=1 SV=1	1.891	Up	0.00044013	BPHL	32.542	8.9	mitochondria	GO:0071466 cellular response to xenobiotic stimulus; GO:0051716 cellular response to stimulus; GO:0009636 response to toxic substance; GO:0044281 small molecule metabolic process; GO:0044763 single-organism cellular process; GO:0006807 nitrogen compound metabolic process; GO:0044699 single-organism process; GO:0050896 response to stimulus; GO:0044238 primary metabolic process; GO:0044237 cellular…	GO:0016020 membrane; GO:0043229 intracellular organelle; GO:0019867 outer membrane; GO:0044421 extracellular region part; GO:0044429 mitochondrial part; GO:0098588 bounding membrane of organelle; GO:0031090 organelle membrane; GO:0005741 mitochondrial outer membrane; GO:0005737 cytoplasm; GO:0044446 intracellular organelle part; GO:0031967 organelle envelope; GO:0031982 vesicle; GO:0044424 intrac…	GO:0016787 hydrolase activity; GO:0052689 carboxylic ester hydrolase activity; GO:0047658 alpha-amino-acid esterase activity; GO:0003824 catalytic activity; GO:0016788 hydrolase activity, acting on ester bonds;	K18399	BPHL; valacyclovir hydrolase [EC:3.1.-.-]		IPR029058; IPR000073;	Alpha/Beta hydrolase fold; Alpha/beta hydrolase fold-1;
P50454	Serpin H1 OS=Homo sapiens OX=9606 GN=SERPINH1 PE=1 SV=2	0.658	Down	0.0171752	SERPINH1	46.44	48.1	extracellular	GO:0030199 collagen fibril organization; GO:0051216 cartilage development; GO:0048869 cellular developmental process; GO:0032964 collagen biosynthetic process; GO:0044236 multicellular organism metabolic process; GO:0044699 single-organism process; GO:0009058 biosynthetic process; GO:0010466 negative regulation of peptidase activity; GO:0008152 metabolic process; GO:0035966 response to topologica…	GO:0016020 membrane; GO:0044421 extracellular region part; GO:0005783 endoplasmic reticulum; GO:0098857 membrane microdomain; GO:0031982 vesicle; GO:0005737 cytoplasm; GO:0044424 intracellular part; GO:0005623 cell; GO:0044422 organelle part; GO:0070062 extracellular exosome; GO:0031974 membrane-enclosed lumen; GO:0070013 intracellular organelle lumen; GO:0044425 membrane part; GO:0044464 cell pa…	GO:0003723 RNA binding; GO:0044877 macromolecular complex binding; GO:0061134 peptidase regulator activity; GO:0005515 protein binding; GO:0004857 enzyme inhibitor activity; GO:0098772 molecular function regulator; GO:0004866 endopeptidase inhibitor activity; GO:1901363 heterocyclic compound binding; GO:0097159 organic cyclic compound binding; GO:0004867 serine-type endopeptidase inhibitor activi…	K09501	SERPINH1, HSP47; serpin peptidase inhibitor, clade H, member 1		IPR033830; IPR023796;	Serpin H1 inhibitory domain; Serpin domain;
O60507	Protein-tyrosine sulfotransferase 1 OS=Homo sapiens OX=9606 GN=TPST1 PE=1 SV=1	2.113	Up	0.000123474	TPST1	42.188	7	extracellular	GO:0006478 peptidyl-tyrosine sulfation; GO:0006790 sulfur compound metabolic process; GO:0006950 response to stress; GO:0044267 cellular protein metabolic process; GO:0018212 peptidyl-tyrosine modification; GO:0051923 sulfation; GO:0050896 response to stimulus; GO:0044238 primary metabolic process; GO:0044237 cellular metabolic process; GO:0071704 organic substance metabolic process; GO:0018193 p…	GO:0043229 intracellular organelle; GO:0016020 membrane; GO:0098588 bounding membrane of organelle; GO:0031090 organelle membrane; GO:0044446 intracellular organelle part; GO:0005737 cytoplasm; GO:0000139 Golgi membrane; GO:0031224 intrinsic component of membrane; GO:0012505 endomembrane system; GO:0044424 intracellular part; GO:0005623 cell; GO:0016021 integral component of membrane; GO:0044422 …	GO:0008146 sulfotransferase activity; GO:0016782 transferase activity, transferring sulfur-containing groups; GO:0008476 protein-tyrosine sulfotransferase activity; GO:0003824 catalytic activity; GO:0016740 transferase activity;	K01021	TPST; protein-tyrosine sulfotransferase [EC:2.8.2.20]		IPR027417;	P-loop containing nucleoside triphosphate hydrolase;
Q9UH99	SUN domain-containing protein 2 OS=Homo sapiens OX=9606 GN=SUN2 PE=1 SV=3	1.732	Up	0.0039229	SUN2	80.31	16.9	nucleus	GO:0030048 actin filament-based movement; GO:0065008 regulation of biological quality; GO:0010256 endomembrane system organization; GO:0030335 positive regulation of cell migration; GO:0051674 localization of cell; GO:0022414 reproductive process; GO:0007420 brain development; GO:0040017 positive regulation of locomotion; GO:0007067 mitotic nuclear division; GO:0048869 cellular developmental proc…	GO:0016020 membrane; GO:0000784 nuclear chromosome, telomeric region; GO:0000781 chromosome, telomeric region; GO:0031410 cytoplasmic vesicle; GO:0031090 organelle membrane; GO:0005737 cytoplasm; GO:0031982 vesicle; GO:0044433 cytoplasmic vesicle part; GO:0031224 intrinsic component of membrane; GO:0032991 macromolecular complex; GO:0044424 intracellular part; GO:0005623 cell; GO:0044422 organell…	GO:0008092 cytoskeletal protein binding; GO:0042802 identical protein binding; GO:0008017 microtubule binding; GO:0005521 lamin binding; GO:0005488 binding; GO:0015631 tubulin binding; GO:0005515 protein binding;	K19347	SUN1_2; SUN domain-containing protein 1/2		IPR012919;	SUN domain;
Q4J6C6	Prolyl endopeptidase-like OS=Homo sapiens OX=9606 GN=PREPL PE=1 SV=1	0.629	Down	0.00044388	PREPL	83.926	13.1	cytoplasm	GO:0006508 proteolysis; GO:0008152 metabolic process; GO:0043170 macromolecule metabolic process; GO:0019538 protein metabolic process; GO:0044238 primary metabolic process; GO:0071704 organic substance metabolic process;	GO:0043229 intracellular organelle; GO:0043232 intracellular non-membrane-bounded organelle; GO:0005737 cytoplasm; GO:0012505 endomembrane system; GO:0044424 intracellular part; GO:0005829 cytosol; GO:0005623 cell; GO:0043228 non-membrane-bounded organelle; GO:0043226 organelle; GO:0005856 cytoskeleton; GO:0043231 intracellular membrane-bounded organelle; GO:0005622 intracellular; GO:0044464 cell…	GO:0004252 serine-type endopeptidase activity; GO:0004175 endopeptidase activity; GO:0008238 exopeptidase activity; GO:0008233 peptidase activity; GO:0003824 catalytic activity; GO:0017171 serine hydrolase activity; GO:0008236 serine-type peptidase activity; GO:0070011 peptidase activity, acting on L-amino acid peptides; GO:0016787 hydrolase activity; GO:0070008 serine-type exopeptidase activity;	K22582			IPR001375; IPR029058; IPR023302;	Peptidase S9, prolyl oligopeptidase, catalytic domain; Alpha/Beta hydrolase fold; Peptidase S9A, N-terminal domain;
Q13232	Nucleoside diphosphate kinase 3 OS=Homo sapiens OX=9606 GN=NME3 PE=1 SV=2	1.662	Up	0.0012617	NME3	19.015	5.9	extracellular	GO:0042278 purine nucleoside metabolic process; GO:0009116 nucleoside metabolic process; GO:0046132 pyrimidine ribonucleoside biosynthetic process; GO:0006165 nucleoside diphosphate phosphorylation; GO:0009147 pyrimidine nucleoside triphosphate metabolic process; GO:0009117 nucleotide metabolic process; GO:0044699 single-organism process; GO:0046129 purine ribonucleoside biosynthetic process; GO:…	GO:0043229 intracellular organelle; GO:0044421 extracellular region part; GO:0005737 cytoplasm; GO:0031982 vesicle; GO:0044424 intracellular part; GO:0005623 cell; GO:0005576 extracellular region; GO:0005739 mitochondrion; GO:0043226 organelle; GO:0070062 extracellular exosome; GO:0043231 intracellular membrane-bounded organelle; GO:0005622 intracellular; GO:0044464 cell part; GO:1903561 extracel…	GO:0005524 ATP binding; GO:1901265 nucleoside phosphate binding; GO:0004550 nucleoside diphosphate kinase activity; GO:0019205 nucleobase-containing compound kinase activity; GO:0001882 nucleoside binding; GO:0043167 ion binding; GO:0005515 protein binding; GO:0000166 nucleotide binding; GO:0016776 phosphotransferase activity, phosphate group as acceptor; GO:0097159 organic cyclic compound bindin…	K00940	ndk, NME; nucleoside-diphosphate kinase [EC:2.7.4.6]	hsa00230 Purine metabolism - Homo sapiens (human); hsa00240 Pyrimidine metabolism - Homo sapiens (human); hsa00983 Drug metabolism - other enzymes - Homo sapiens (human); hsa01100 Metabolic pathways - Homo sapiens (human);
Q9UKA4	A-kinase anchor protein 11 OS=Homo sapiens OX=9606 GN=AKAP11 PE=1 SV=1	2.274	Up	0.00142408	AKAP11	210.51	1	nucleus	GO:0044700 single organism signaling; GO:0050794 regulation of cellular process; GO:0051716 cellular response to stimulus; GO:1902531 regulation of intracellular signal transduction; GO:0035556 intracellular signal transduction; GO:0023051 regulation of signaling; GO:0044699 single-organism process; GO:0023052 signaling; GO:0050896 response to stimulus; GO:0010738 regulation of protein kinase A s…	GO:0016020 membrane; GO:0043229 intracellular organelle; GO:0043232 intracellular non-membrane-bounded organelle; GO:0071944 cell periphery; GO:0044430 cytoskeletal part; GO:0005777 peroxisome; GO:0005737 cytoplasm; GO:0044446 intracellular organelle part; GO:0031981 nuclear lumen; GO:0044424 intracellular part; GO:0005730 nucleolus; GO:0005829 cytosol; GO:0005623 cell; GO:0044422 organelle part;…	GO:0051018 protein kinase A binding; GO:0005515 protein binding; GO:0019902 phosphatase binding; GO:0019903 protein phosphatase binding; GO:0019899 enzyme binding; GO:0005488 binding; GO:0008157 protein phosphatase 1 binding;	K16527	AKAP11; A-kinase anchor protein 11
P30740	Leukocyte elastase inhibitor OS=Homo sapiens OX=9606 GN=SERPINB1 PE=1 SV=1	0.542	Down	0.025543	SERPINB1	42.741	31.4	cytoplasm	GO:0050794 regulation of cellular process; GO:0010951 negative regulation of endopeptidase activity; GO:0045321 leukocyte activation; GO:0002283 neutrophil activation involved in immune response; GO:0002252 immune effector process; GO:0060255 regulation of macromolecule metabolic process; GO:0044699 single-organism process; GO:0048523 negative regulation of cellular process; GO:0048519 negative r…	GO:0016020 membrane; GO:0034774 secretory granule lumen; GO:0005615 extracellular space; GO:0044421 extracellular region part; GO:0031410 cytoplasmic vesicle; GO:0005737 cytoplasm; GO:0031982 vesicle; GO:0044433 cytoplasmic vesicle part; GO:0044424 intracellular part; GO:0005623 cell; GO:0044422 organelle part; GO:0031974 membrane-enclosed lumen; GO:0070062 extracellular exosome; GO:0031983 vesic…	GO:0004867 serine-type endopeptidase inhibitor activity; GO:0030234 enzyme regulator activity; GO:0030414 peptidase inhibitor activity; GO:0061134 peptidase regulator activity; GO:0061135 endopeptidase regulator activity; GO:0098772 molecular function regulator; GO:0004857 enzyme inhibitor activity; GO:0004866 endopeptidase inhibitor activity;	K13963	SERPINB; serpin B	hsa05146 Amoebiasis - Homo sapiens (human);	IPR023796;	Serpin domain;
A6NIH7	Protein unc-119 homolog B OS=Homo sapiens OX=9606 GN=UNC119B PE=1 SV=1	2.799	Up	0.00067744	UNC119B	28.136	19.1	cytoplasm	GO:0044085 cellular component biogenesis; GO:0016043 cellular component organization; GO:0044707 single-multicellular organism process; GO:0048869 cellular developmental process; GO:0060271 cilium assembly; GO:0044699 single-organism process; GO:0022008 neurogenesis; GO:0015031 protein transport; GO:0044782 cilium organization; GO:0051234 establishment of localization; GO:0030154 cell differentia…	GO:0005929 cilium; GO:0043226 organelle; GO:0042995 cell projection; GO:0035869 ciliary transition zone; GO:0044441 ciliary part; GO:0005622 intracellular; GO:0044464 cell part; GO:0005737 cytoplasm; GO:0044424 intracellular part; GO:0005829 cytosol; GO:0044463 cell projection part; GO:0005623 cell; GO:0044422 organelle part; GO:0044444 cytoplasmic part;	GO:0008289 lipid binding; GO:0005515 protein binding; GO:0005488 binding;				IPR008015; IPR014756;	GMP phosphodiesterase, delta subunit; Immunoglobulin E-set;
O95163	Elongator complex protein 1 OS=Homo sapiens OX=9606 GN=ELP1 PE=1 SV=3	1.682	Up	0.00081868	ELP1	150.25	9.7	nucleus	GO:0044085 cellular component biogenesis; GO:0044700 single organism signaling; GO:0030335 positive regulation of cell migration; GO:0097659 nucleic acid-templated transcription; GO:0040017 positive regulation of locomotion; GO:0044699 single-organism process; GO:0009058 biosynthetic process; GO:0006354 DNA-templated transcription, elongation; GO:0009451 RNA modification; GO:0044237 cellular meta…	GO:0005737 cytoplasm; GO:0032991 macromolecular complex; GO:0044424 intracellular part; GO:0005623 cell; GO:0000123 histone acetyltransferase complex; GO:0044422 organelle part; GO:0043228 non-membrane-bounded organelle; GO:0031974 membrane-enclosed lumen; GO:1902494 catalytic complex; GO:0005654 nucleoplasm; GO:0031248 protein acetyltransferase complex; GO:0070013 intracellular organelle lumen; …	GO:0030234 enzyme regulator activity; GO:0005488 binding; GO:0005515 protein binding; GO:0019887 protein kinase regulator activity; GO:0019207 kinase regulator activity; GO:0098772 molecular function regulator; GO:0008607 phosphorylase kinase regulator activity; GO:0004871 signal transducer activity;	K11373	ELP1, IKI3, IKBKAP; elongator complex protein 1		IPR011042;	Six-bladed beta-propeller, TolB-like;
Q9NRY5	Protein FAM114A2 OS=Homo sapiens OX=9606 GN=FAM114A2 PE=1 SV=4	1.658	Up	0.039463	FAM114A2	55.468	20	nucleus			GO:0097159 organic cyclic compound binding; GO:1901363 heterocyclic compound binding; GO:1901265 nucleoside phosphate binding; GO:0005488 binding; GO:0000166 nucleotide binding; GO:0017076 purine nucleotide binding; GO:0036094 small molecule binding;
Q15637	Splicing factor 1 OS=Homo sapiens OX=9606 GN=SF1 PE=1 SV=4	0.498	Down	1.52426e-05	SF1	68.329	14.2	nucleus	GO:0044085 cellular component biogenesis; GO:0022613 ribonucleoprotein complex biogenesis; GO:0022618 ribonucleoprotein complex assembly; GO:0022414 reproductive process; GO:0097659 nucleic acid-templated transcription; GO:0048869 cellular developmental process; GO:0008584 male gonad development; GO:0044699 single-organism process; GO:0009058 biosynthetic process; GO:0019216 regulation of lipid m…	GO:0005840 ribosome; GO:0043229 intracellular organelle; GO:0043232 intracellular non-membrane-bounded organelle; GO:0044446 intracellular organelle part; GO:0005737 cytoplasm; GO:0031981 nuclear lumen; GO:0032991 macromolecular complex; GO:0044424 intracellular part; GO:0005681 spliceosomal complex; GO:0016604 nuclear body; GO:0005623 cell; GO:0044422 organelle part; GO:0043228 non-membrane-boun…	GO:0003723 RNA binding; GO:0003714 transcription corepressor activity; GO:0043167 ion binding; GO:0005515 protein binding; GO:0008270 zinc ion binding; GO:0003712 transcription cofactor activity; GO:1901363 heterocyclic compound binding; GO:0097159 organic cyclic compound binding; GO:0045131 pre-mRNA branch point binding; GO:0042802 identical protein binding; GO:0046914 transition metal ion bindi…	K13095	SF1; splicing factor 1		IPR004087; IPR032570; IPR004088; IPR001878;	K Homology domain; Splicing factor 1, helix-hairpin domain; K Homology domain, type 1; Zinc finger, CCHC-type;
P53367	Arfaptin-1 OS=Homo sapiens OX=9606 GN=ARFIP1 PE=1 SV=2	2.112	Up	1.95595e-05	ARFIP1	41.738	23.1	cytoplasm	GO:0030833 regulation of actin filament polymerization; GO:0050794 regulation of cellular process; GO:0016043 cellular component organization; GO:0046907 intracellular transport; GO:0065008 regulation of biological quality; GO:0032956 regulation of actin cytoskeleton organization; GO:0051046 regulation of secretion; GO:0034315 regulation of Arp2/3 complex-mediated actin nucleation; GO:0044699 sin…	GO:0043229 intracellular organelle; GO:0016020 membrane; GO:0098588 bounding membrane of organelle; GO:0031090 organelle membrane; GO:0005737 cytoplasm; GO:0044446 intracellular organelle part; GO:0000139 Golgi membrane; GO:0012505 endomembrane system; GO:0032588 trans-Golgi network membrane; GO:0044424 intracellular part; GO:0005829 cytosol; GO:0005623 cell; GO:0044422 organelle part; GO:0043226…	GO:1901981 phosphatidylinositol phosphate binding; GO:0050839 cell adhesion molecule binding; GO:0005488 binding; GO:0005543 phospholipid binding; GO:0035091 phosphatidylinositol binding; GO:0043167 ion binding; GO:0045296 cadherin binding; GO:0008289 lipid binding; GO:0043168 anion binding; GO:0005515 protein binding; GO:0019904 protein domain specific binding; GO:0070273 phosphatidylinositol-4-…	K20314	ARFIP; arfaptin		IPR010504; IPR027267;	Arfaptin homology (AH) domain; Arfaptin homology (AH) domain/BAR domain;
Q6NZI2	Caveolae-associated protein 1 OS=Homo sapiens OX=9606 GN=CAVIN1 PE=1 SV=1	0.642	Down	0.000141681	CAVIN1	43.476	38.2	nucleus	GO:0050794 regulation of cellular process; GO:0006361 transcription initiation from RNA polymerase I promoter; GO:0006725 cellular aromatic compound metabolic process; GO:0006360 transcription from RNA polymerase I promoter; GO:0060255 regulation of macromolecule metabolic process; GO:0097659 nucleic acid-templated transcription; GO:0019219 regulation of nucleobase-containing compound metabolic p…	GO:0016020 membrane; GO:0005783 endoplasmic reticulum; GO:0098857 membrane microdomain; GO:0071944 cell periphery; GO:0005737 cytoplasm; GO:0032991 macromolecular complex; GO:0044424 intracellular part; GO:0005623 cell; GO:0044422 organelle part; GO:0031974 membrane-enclosed lumen; GO:0005654 nucleoplasm; GO:0070013 intracellular organelle lumen; GO:0098590 plasma membrane region; GO:0044425 memb…	GO:0097159 organic cyclic compound binding; GO:1901363 heterocyclic compound binding; GO:0003723 RNA binding; GO:0042134 rRNA primary transcript binding; GO:0005488 binding; GO:0003676 nucleic acid binding; GO:0005515 protein binding; GO:0019843 rRNA binding;	K19387	PTRF; polymerase I and transcript release factor
Q9NVD7	Alpha-parvin OS=Homo sapiens OX=9606 GN=PARVA PE=1 SV=1	0.469	Down	0.00188295	PARVA	42.243	22.6	cytoplasm,nucleus	GO:0044085 cellular component biogenesis; GO:0030048 actin filament-based movement; GO:0003148 outflow tract septum morphogenesis; GO:0065008 regulation of biological quality; GO:0070252 actin-mediated cell contraction; GO:0051674 localization of cell; GO:0001568 blood vessel development; GO:0048869 cellular developmental process; GO:0032989 cellular component morphogenesis; GO:0060271 cilium ass…	GO:0043229 intracellular organelle; GO:0016020 membrane; GO:0043232 intracellular non-membrane-bounded organelle; GO:0071944 cell periphery; GO:0030054 cell junction; GO:0030016 myofibril; GO:0005737 cytoplasm; GO:0070161 anchoring junction; GO:0099512 supramolecular fiber; GO:0044424 intracellular part; GO:0030018 Z disc; GO:0005829 cytosol; GO:0099080 supramolecular complex; GO:0005623 cell; GO…	GO:0003779 actin binding; GO:0050839 cell adhesion molecule binding; GO:0005515 protein binding; GO:0008092 cytoskeletal protein binding; GO:0005488 binding; GO:0045296 cadherin binding;	K06275	PARV; parvin	hsa04510 Focal adhesion - Homo sapiens (human);	IPR001715;	Calponin homology domain;
P13611	Versican core protein OS=Homo sapiens OX=9606 GN=VCAN PE=1 SV=3	11.611	Up	2.2335e-05	VCAN	372.82	0.8	mitochondria	GO:0001649 osteoblast differentiation; GO:0016053 organic acid biosynthetic process; GO:0051674 localization of cell; GO:0030206 chondroitin sulfate biosynthetic process; GO:0006024 glycosaminoglycan biosynthetic process; GO:0006026 aminoglycan catabolic process; GO:0048869 cellular developmental process; GO:0022008 neurogenesis; GO:0044699 single-organism process; GO:0009058 biosynthetic process…	GO:0016020 membrane; GO:0005615 extracellular space; GO:0044421 extracellular region part; GO:0005737 cytoplasm; GO:0044424 intracellular part; GO:0005623 cell; GO:0044422 organelle part; GO:0005775 vacuolar lumen; GO:0031974 membrane-enclosed lumen; GO:0070013 intracellular organelle lumen; GO:0005622 intracellular; GO:0044464 cell part; GO:0005764 lysosome; GO:0044431 Golgi apparatus part; GO:0…	GO:0005201 extracellular matrix structural constituent; GO:0097367 carbohydrate derivative binding; GO:0005488 binding; GO:0043167 ion binding; GO:0005540 hyaluronic acid binding; GO:0043169 cation binding; GO:0046872 metal ion binding; GO:0030246 carbohydrate binding; GO:0005515 protein binding; GO:0005509 calcium ion binding; GO:0005539 glycosaminoglycan binding; GO:0005198 structural molecule …	K06793	VCAN, CSPG2; versican core protein	hsa04514 Cell adhesion molecules (CAMs) - Homo sapiens (human);	IPR007110; IPR016187; IPR001881; IPR003599; IPR000742; IPR016186; IPR001304; IPR033987; IPR000436; IPR013783; IPR013106; IPR000538;	Immunoglobulin-like domain; C-type lectin fold; EGF-like calcium-binding domain; Immunoglobulin subtype; EGF-like domain; C-type lectin-like/link domain; C-type lectin-like; Aggrecan/versican, C-type lectin-like domain; Sushi/SCR/CCP domain; Immunoglobulin-like fold; Immunoglobulin V-set domain; Link domain;
Q9BWT3	Poly(A) polymerase gamma OS=Homo sapiens OX=9606 GN=PAPOLG PE=1 SV=2	0.624	Down	0.00119654	PAPOLG	82.802	1.2	nucleus	GO:0031123 RNA 3'-end processing; GO:0006396 RNA processing; GO:0043631 RNA polyadenylation; GO:0006725 cellular aromatic compound metabolic process; GO:0031124 mRNA 3'-end processing; GO:0006378 mRNA polyadenylation; GO:1901360 organic cyclic compound metabolic process; GO:0006807 nitrogen compound metabolic process; GO:0044238 primary metabolic process; GO:0044237 cellular metabolic process; GO…	GO:0043229 intracellular organelle; GO:0016020 membrane; GO:0005737 cytoplasm; GO:0044446 intracellular organelle part; GO:0031981 nuclear lumen; GO:0044424 intracellular part; GO:0005829 cytosol; GO:0016604 nuclear body; GO:0005623 cell; GO:0044422 organelle part; GO:0043226 organelle; GO:0043231 intracellular membrane-bounded organelle; GO:0031974 membrane-enclosed lumen; GO:0005654 nucleoplasm…	GO:0003723 RNA binding; GO:0005524 ATP binding; GO:1901265 nucleoside phosphate binding; GO:0001882 nucleoside binding; GO:0043167 ion binding; GO:0000166 nucleotide binding; GO:0070566 adenylyltransferase activity; GO:1901363 heterocyclic compound binding; GO:0097159 organic cyclic compound binding; GO:0032549 ribonucleoside binding; GO:0004652 polynucleotide adenylyltransferase activity; GO:009…	K14376	PAP; poly(A) polymerase [EC:2.7.7.19]	hsa03015 mRNA surveillance pathway - Homo sapiens (human);	IPR011068; IPR007012; IPR002934; IPR007010;	Nucleotidyltransferase, class I, C-terminal-like; Poly(A) polymerase, central domain; Polymerase, nucleotidyl transferase domain; Poly(A) polymerase, RNA-binding domain;
P12111	Collagen alpha-3(VI) chain OS=Homo sapiens OX=9606 GN=COL6A3 PE=1 SV=5	2.564	Up	1.7783e-06	COL6A3	343.67	35.7	extracellular	GO:0050794 regulation of cellular process; GO:0016043 cellular component organization; GO:0044707 single-multicellular organism process; GO:0010951 negative regulation of endopeptidase activity; GO:0060255 regulation of macromolecule metabolic process; GO:0044236 multicellular organism metabolic process; GO:0044699 single-organism process; GO:0031324 negative regulation of cellular metabolic proc…	GO:0016020 membrane; GO:0005615 extracellular space; GO:0044421 extracellular region part; GO:0005783 endoplasmic reticulum; GO:0071944 cell periphery; GO:0031982 vesicle; GO:0005737 cytoplasm; GO:0032991 macromolecular complex; GO:0099512 supramolecular fiber; GO:0044424 intracellular part; GO:0099080 supramolecular complex; GO:0005623 cell; GO:0005581 collagen trimer; GO:0044422 organelle part;…	GO:0004867 serine-type endopeptidase inhibitor activity; GO:0030234 enzyme regulator activity; GO:0005488 binding; GO:0030414 peptidase inhibitor activity; GO:0061134 peptidase regulator activity; GO:0005515 protein binding; GO:0061135 endopeptidase regulator activity; GO:0004857 enzyme inhibitor activity; GO:0098772 molecular function regulator; GO:0004866 endopeptidase inhibitor activity;	K06238	COL6A; collagen, type VI, alpha	hsa04151 PI3K-Akt signaling pathway - Homo sapiens (human); hsa04510 Focal adhesion - Homo sapiens (human); hsa04512 ECM-receptor interaction - Homo sapiens (human); hsa04974 Protein digestion and absorption - Homo sapiens (human); hsa05165 Human papillomavirus infection - Homo sapiens (human);	IPR013783; IPR003961; IPR002223; IPR002035;	Immunoglobulin-like fold; Fibronectin type III; Pancreatic trypsin inhibitor Kunitz domain; von Willebrand factor, type A;
Q6FI81	Anamorsin OS=Homo sapiens OX=9606 GN=CIAPIN1 PE=1 SV=2	1.986	Up	0.0003209	CIAPIN1	33.582	21.8	nucleus	GO:0044085 cellular component biogenesis; GO:0051188 cofactor biosynthetic process; GO:0050794 regulation of cellular process; GO:0016043 cellular component organization; GO:0044707 single-multicellular organism process; GO:0010941 regulation of cell death; GO:0043069 negative regulation of programmed cell death; GO:0043067 regulation of programmed cell death; GO:0044699 single-organism process; …	GO:0043229 intracellular organelle; GO:0044429 mitochondrial part; GO:0043232 intracellular non-membrane-bounded organelle; GO:0031967 organelle envelope; GO:0044446 intracellular organelle part; GO:0005737 cytoplasm; GO:0031981 nuclear lumen; GO:0044424 intracellular part; GO:0005730 nucleolus; GO:0005623 cell; GO:0005739 mitochondrion; GO:0044422 organelle part; GO:0043228 non-membrane-bounded …	GO:0051537 2 iron, 2 sulfur cluster binding; GO:0008168 methyltransferase activity; GO:0003824 catalytic activity; GO:0005488 binding; GO:0051536 iron-sulfur cluster binding; GO:0043167 ion binding; GO:0046872 metal ion binding; GO:0043169 cation binding; GO:0016741 transferase activity, transferring one-carbon groups; GO:0005515 protein binding; GO:0016740 transferase activity; GO:0051540 metal …	K22746			IPR029063; IPR013216;	S-adenosyl-L-methionine-dependent methyltransferase; Methyltransferase type 11;
O00522	Krev interaction trapped protein 1 OS=Homo sapiens OX=9606 GN=KRIT1 PE=1 SV=2	8.892	Up	8.879e-07	KRIT1	84.347	3.5	cytoplasm,nucleus	GO:0044700 single organism signaling; GO:0051093 negative regulation of developmental process; GO:0010941 regulation of cell death; GO:0065008 regulation of biological quality; GO:2000351 regulation of endothelial cell apoptotic process; GO:0001568 blood vessel development; GO:0010633 negative regulation of epithelial cell migration; GO:0032092 positive regulation of protein binding; GO:0051241 n…	GO:0043229 intracellular organelle; GO:0016020 membrane; GO:0099513 polymeric cytoskeletal fiber; GO:0005615 extracellular space; GO:0044421 extracellular region part; GO:0005874 microtubule; GO:0043232 intracellular non-membrane-bounded organelle; GO:0071944 cell periphery; GO:0030054 cell junction; GO:0044430 cytoskeletal part; GO:0005737 cytoplasm; GO:0044446 intracellular organelle part; GO:0…	GO:1901981 phosphatidylinositol phosphate binding; GO:0060589 nucleoside-triphosphatase regulator activity; GO:0044877 macromolecular complex binding; GO:0043167 ion binding; GO:0030695 GTPase regulator activity; GO:0015631 tubulin binding; GO:0005515 protein binding; GO:0098772 molecular function regulator; GO:1902936 phosphatidylinositol bisphosphate binding; GO:0008092 cytoskeletal protein bin…	K17705	KRIT1; Krev interaction trapped protein 1	hsa04015 Rap1 signaling pathway - Homo sapiens (human);	IPR019749; IPR019748; IPR032022; IPR020683; IPR000299; IPR014352;	Band 4.1 domain; FERM central domain; KRIT, N-terminal NPxY motif-rich region; Ankyrin repeat-containing domain; FERM domain; FERM/acyl-CoA-binding protein, 3-helical bundle;
Q16610	Extracellular matrix protein 1 OS=Homo sapiens OX=9606 GN=ECM1 PE=1 SV=2	3.646	Up	2.4213e-05	ECM1	60.673	18.5	extracellular	GO:0044700 single organism signaling; GO:0030500 regulation of bone mineralization; GO:0070167 regulation of biomineral tissue development; GO:0010466 negative regulation of peptidase activity; GO:0001525 angiogenesis; GO:0051240 positive regulation of multicellular organismal process; GO:0032879 regulation of localization; GO:0050678 regulation of epithelial cell proliferation; GO:0043122 regula…	GO:0034774 secretory granule lumen; GO:0042827 platelet dense granule; GO:0005615 extracellular space; GO:0044421 extracellular region part; GO:0031410 cytoplasmic vesicle; GO:0005737 cytoplasm; GO:0031982 vesicle; GO:0044433 cytoplasmic vesicle part; GO:0044424 intracellular part; GO:0005623 cell; GO:0044422 organelle part; GO:0031974 membrane-enclosed lumen; GO:0070062 extracellular exosome; GO…	GO:0002020 protease binding; GO:0043236 laminin binding; GO:0005102 receptor binding; GO:0005488 binding; GO:0005126 cytokine receptor binding; GO:0070851 growth factor receptor binding; GO:0008022 protein C-terminus binding; GO:0005515 protein binding; GO:0005134 interleukin-2 receptor binding; GO:0004871 signal transducer activity; GO:0050840 extracellular matrix binding; GO:0019899 enzyme bind…				IPR020858;	Serum albumin-like;
Q9P2E5	Chondroitin sulfate glucuronyltransferase OS=Homo sapiens OX=9606 GN=CHPF2 PE=2 SV=2	2.024	Up	0.002404	CHPF2	85.947	2.8	endoplasmic reticulum	GO:0030206 chondroitin sulfate biosynthetic process; GO:0006024 glycosaminoglycan biosynthetic process; GO:0044699 single-organism process; GO:0009058 biosynthetic process; GO:1901566 organonitrogen compound biosynthetic process; GO:0044237 cellular metabolic process; GO:0044272 sulfur compound biosynthetic process; GO:0071704 organic substance metabolic process; GO:0030204 chondroitin sulfate me…	GO:0043229 intracellular organelle; GO:0016020 membrane; GO:0032580 Golgi cisterna membrane; GO:0098588 bounding membrane of organelle; GO:0031090 organelle membrane; GO:0005737 cytoplasm; GO:0044446 intracellular organelle part; GO:0000139 Golgi membrane; GO:0031224 intrinsic component of membrane; GO:0012505 endomembrane system; GO:0005795 Golgi stack; GO:0044424 intracellular part; GO:0005623 …	GO:0015020 glucuronosyltransferase activity; GO:0016758 transferase activity, transferring hexosyl groups; GO:0050510 N-acetylgalactosaminyl-proteoglycan 3-beta-glucuronosyltransferase activity; GO:0003824 catalytic activity; GO:0008194 UDP-glycosyltransferase activity; GO:0016757 transferase activity, transferring glycosyl groups; GO:0008376 acetylgalactosaminyltransferase activity; GO:0016740 t…	K03419	CHPF2; chondroitin polymerizing factor 2 [EC:2.4.1.226]	hsa00532 Glycosaminoglycan biosynthesis - chondroitin sulfate / dermatan sulfate - Homo sapiens (human); hsa01100 Metabolic pathways - Homo sapiens (human);
Q14202	Zinc finger MYM-type protein 3 OS=Homo sapiens OX=9606 GN=ZMYM3 PE=1 SV=2	2.385	Up	0.0038035	ZMYM3	152.38	1.2	cytoplasm	GO:0050794 regulation of cellular process; GO:0016043 cellular component organization; GO:0044707 single-multicellular organism process; GO:0060255 regulation of macromolecule metabolic process; GO:0019219 regulation of nucleobase-containing compound metabolic process; GO:0044699 single-organism process; GO:2001141 regulation of RNA biosynthetic process; GO:0009889 regulation of biosynthetic proc…	GO:0043229 intracellular organelle; GO:0005737 cytoplasm; GO:0044446 intracellular organelle part; GO:0031981 nuclear lumen; GO:0044424 intracellular part; GO:0005623 cell; GO:0044422 organelle part; GO:0043226 organelle; GO:0043231 intracellular membrane-bounded organelle; GO:0031974 membrane-enclosed lumen; GO:0005654 nucleoplasm; GO:0005634 nucleus; GO:0070013 intracellular organelle lumen; GO…	GO:0097159 organic cyclic compound binding; GO:1901363 heterocyclic compound binding; GO:0000981 RNA polymerase II transcription factor activity, sequence-specific DNA binding; GO:0003677 DNA binding; GO:0046914 transition metal ion binding; GO:0005488 binding; GO:0043167 ion binding; GO:0001071 nucleic acid binding transcription factor activity; GO:0003676 nucleic acid binding; GO:0046872 metal …				IPR021893; IPR010507; IPR011017;	Protein of unknown function DUF3504; Zinc finger, MYM-type; TRASH domain;
P12081	Histidine--tRNA ligase, cytoplasmic OS=Homo sapiens OX=9606 GN=HARS PE=1 SV=2	0.475	Down	0.0107408	HARS	57.41	39.9	cytoplasm	GO:0006518 peptide metabolic process; GO:0006725 cellular aromatic compound metabolic process; GO:0044267 cellular protein metabolic process; GO:0044699 single-organism process; GO:0009058 biosynthetic process; GO:0043039 tRNA aminoacylation; GO:1901566 organonitrogen compound biosynthetic process; GO:0044237 cellular metabolic process; GO:0071704 organic substance metabolic process; GO:0008152 m…	GO:0043226 organelle; GO:0043231 intracellular membrane-bounded organelle; GO:0043229 intracellular organelle; GO:0044464 cell part; GO:0005622 intracellular; GO:0005737 cytoplasm; GO:0044424 intracellular part; GO:0043227 membrane-bounded organelle; GO:0005623 cell; GO:0005829 cytosol; GO:0005739 mitochondrion; GO:0044444 cytoplasmic part;	GO:0016876 ligase activity, forming aminoacyl-tRNA and related compounds; GO:0005524 ATP binding; GO:1901265 nucleoside phosphate binding; GO:0016875 ligase activity, forming carbon-oxygen bonds; GO:0016874 ligase activity; GO:0001882 nucleoside binding; GO:0043167 ion binding; GO:0000166 nucleotide binding; GO:0097159 organic cyclic compound binding; GO:1901363 heterocyclic compound binding; GO:…	K01892	HARS, hisS; histidyl-tRNA synthetase [EC:6.1.1.21]	hsa00970 Aminoacyl-tRNA biosynthesis - Homo sapiens (human);	IPR004154; IPR009068; IPR033656; IPR000738; IPR006195;	Anticodon-binding; S15/NS1, RNA-binding; Histidyl-anticodon-binding; WHEP-TRS domain; Aminoacyl-tRNA synthetase, class II;
Q9BRP4	Proteasomal ATPase-associated factor 1 OS=Homo sapiens OX=9606 GN=PAAF1 PE=1 SV=2	3.461	Up	0.00032229	PAAF1	42.19	3.3	cytoplasm,nucleus	GO:0044403 symbiosis, encompassing mutualism through parasitism; GO:0044764 multi-organism cellular process; GO:0044419 interspecies interaction between organisms; GO:0009987 cellular process; GO:0016032 viral process; GO:0051704 multi-organism process;	GO:1902494 catalytic complex; GO:0000502 proteasome complex; GO:0044464 cell part; GO:0005622 intracellular; GO:0032991 macromolecular complex; GO:0044424 intracellular part; GO:1905368 peptidase complex; GO:0005623 cell; GO:0043234 protein complex; GO:1905369 endopeptidase complex;	GO:0005515 protein binding; GO:0005488 binding;	K11887	PAAF1, RPN14; proteasomal ATPase-associated factor 1		IPR017986; IPR015943;	WD40-repeat-containing domain; WD40/YVTN repeat-like-containing domain;
Q13029	PR domain zinc finger protein 2 OS=Homo sapiens OX=9606 GN=PRDM2 PE=1 SV=3	1.777	Up	0.00040121	PRDM2	188.91	0.5	nucleus	GO:0097659 nucleic acid-templated transcription; GO:0009891 positive regulation of biosynthetic process; GO:0044699 single-organism process; GO:0009058 biosynthetic process; GO:0044237 cellular metabolic process; GO:0032259 methylation; GO:2001141 regulation of RNA biosynthetic process; GO:0008213 protein alkylation; GO:0008152 metabolic process; GO:0009893 positive regulation of metabolic proces…	GO:0043226 organelle; GO:0043231 intracellular membrane-bounded organelle; GO:0043229 intracellular organelle; GO:0005634 nucleus; GO:0044464 cell part; GO:0005622 intracellular; GO:0005737 cytoplasm; GO:0012505 endomembrane system; GO:0044424 intracellular part; GO:0005794 Golgi apparatus; GO:0043227 membrane-bounded organelle; GO:0005623 cell; GO:0044444 cytoplasmic part;	GO:0008757 S-adenosylmethionine-dependent methyltransferase activity; GO:0000981 RNA polymerase II transcription factor activity, sequence-specific DNA binding; GO:0008168 methyltransferase activity; GO:0003690 double-stranded DNA binding; GO:0016279 protein-lysine N-methyltransferase activity; GO:0005515 protein binding; GO:0003700 transcription factor activity, sequence-specific DNA binding; GO…	K11432	PRDM2, RIZ; histone-lysine N-methyltransferase PRDM2 [EC:2.1.1.43]	hsa00310 Lysine degradation - Homo sapiens (human);	IPR015880; IPR001214; IPR007087; IPR013087;	Zinc finger, C2H2-like; SET domain; Zinc finger, C2H2; Zinc finger C2H2-type/integrase DNA-binding domain;
Q5H9R7	Serine/threonine-protein phosphatase 6 regulatory subunit 3 OS=Homo sapiens OX=9606 GN=PPP6R3 PE=1 SV=2	1.687	Up	0.034238	PPP6R3	97.668	5.6	nucleus	GO:0044085 cellular component biogenesis; GO:0051640 organelle localization; GO:0050794 regulation of cellular process; GO:0016043 cellular component organization; GO:0006901 vesicle coating; GO:0046907 intracellular transport; GO:0048207 vesicle targeting, rough ER to cis-Golgi; GO:0043666 regulation of phosphoprotein phosphatase activity; GO:0048208 COPII vesicle coating; GO:0060255 regulation …	GO:0016020 membrane; GO:0043229 intracellular organelle; GO:0098588 bounding membrane of organelle; GO:0031090 organelle membrane; GO:0071944 cell periphery; GO:0005737 cytoplasm; GO:0044446 intracellular organelle part; GO:0000139 Golgi membrane; GO:0012505 endomembrane system; GO:0031981 nuclear lumen; GO:0044424 intracellular part; GO:0005829 cytosol; GO:0005623 cell; GO:0044422 organelle part…	GO:0005515 protein binding; GO:0019902 phosphatase binding; GO:0019903 protein phosphatase binding; GO:0005488 binding; GO:0019899 enzyme binding;	K15501	PPP6R3, SAPS3; serine/threonine-protein phosphatase 6 regulatory subunit 3		IPR016024;	Armadillo-type fold;
O75147	Obscurin-like protein 1 OS=Homo sapiens OX=9606 GN=OBSL1 PE=1 SV=4	0.544	Down	0.035641	OBSL1	206.94	0.5	nucleus	GO:0044085 cellular component biogenesis; GO:0010256 endomembrane system organization; GO:0045666 positive regulation of neuron differentiation; GO:0003012 muscle system process; GO:0048869 cellular developmental process; GO:0032989 cellular component morphogenesis; GO:0022008 neurogenesis; GO:0044699 single-organism process; GO:0010564 regulation of cell cycle process; GO:0051130 positive regula…	GO:0030054 cell junction; GO:0044291 cell-cell contact zone; GO:0030016 myofibril; GO:0005737 cytoplasm; GO:0032991 macromolecular complex; GO:0099512 supramolecular fiber; GO:0044424 intracellular part; GO:0030018 Z disc; GO:0005911 cell-cell junction; GO:0099080 supramolecular complex; GO:0005623 cell; GO:0031674 I band; GO:0014704 intercalated disc; GO:0044422 organelle part; GO:0043228 non-me…	GO:0051015 actin filament binding; GO:0030674 protein binding, bridging; GO:0044877 macromolecular complex binding; GO:0005515 protein binding; GO:0008307 structural constituent of muscle; GO:0051371 muscle alpha-actinin binding; GO:0097493 structural molecule activity conferring elasticity; GO:0008092 cytoskeletal protein binding; GO:0008093 cytoskeletal adaptor activity; GO:0005488 binding; GO:…	K19574	OBSL1; obscurin-like protein 1		IPR003598; IPR007110; IPR013783; IPR003599; IPR003961; IPR013098;	Immunoglobulin subtype 2; Immunoglobulin-like domain; Immunoglobulin-like fold; Immunoglobulin subtype; Fibronectin type III; Immunoglobulin I-set;
Q969T3	Sorting nexin-21 OS=Homo sapiens OX=9606 GN=SNX21 PE=2 SV=1	5.538	Up	0.00024428	SNX21	41.365	4	nucleus	GO:0045184 establishment of protein localization; GO:0006810 transport; GO:0071702 organic substance transport; GO:0051179 localization; GO:0033036 macromolecule localization; GO:0008104 protein localization; GO:0015031 protein transport; GO:0051234 establishment of localization;	GO:0010008 endosome membrane; GO:0097708 intracellular vesicle; GO:0043229 intracellular organelle; GO:0016020 membrane; GO:0098588 bounding membrane of organelle; GO:0031090 organelle membrane; GO:0031410 cytoplasmic vesicle; GO:0044446 intracellular organelle part; GO:0005737 cytoplasm; GO:0031982 vesicle; GO:0044433 cytoplasmic vesicle part; GO:0012506 vesicle membrane; GO:0044440 endosomal pa…	GO:1901981 phosphatidylinositol phosphate binding; GO:0032266 phosphatidylinositol-3-phosphate binding; GO:0005546 phosphatidylinositol-4,5-bisphosphate binding; GO:0005488 binding; GO:0005543 phospholipid binding; GO:0035091 phosphatidylinositol binding; GO:0043167 ion binding; GO:0008289 lipid binding; GO:0005515 protein binding; GO:0043168 anion binding; GO:1902936 phosphatidylinositol bisphos…	K17932	SNX21; sorting nexin-21		IPR011990; IPR001683;	Tetratricopeptide-like helical domain; Phox homologous domain;
Q16540	39S ribosomal protein L23, mitochondrial OS=Homo sapiens OX=9606 GN=MRPL23 PE=1 SV=1	2.456	Up	1.88749e-05	MRPL23	17.781	9.8	mitochondria	GO:0016043 cellular component organization; GO:0006518 peptide metabolic process; GO:0044267 cellular protein metabolic process; GO:0044699 single-organism process; GO:0009058 biosynthetic process; GO:1901566 organonitrogen compound biosynthetic process; GO:0044237 cellular metabolic process; GO:0043241 protein complex disassembly; GO:0071704 organic substance metabolic process; GO:0008152 metabo…	GO:0016020 membrane; GO:0031090 organelle membrane; GO:0005737 cytoplasm; GO:0032991 macromolecular complex; GO:0044424 intracellular part; GO:0005762 mitochondrial large ribosomal subunit; GO:0005623 cell; GO:0000313 organellar ribosome; GO:0044422 organelle part; GO:0043228 non-membrane-bounded organelle; GO:0005740 mitochondrial envelope; GO:0031974 membrane-enclosed lumen; GO:0070013 intracel…	GO:0097159 organic cyclic compound binding; GO:1901363 heterocyclic compound binding; GO:0003723 RNA binding; GO:1901265 nucleoside phosphate binding; GO:0005488 binding; GO:0003676 nucleic acid binding; GO:0005515 protein binding; GO:0000166 nucleotide binding; GO:0003735 structural constituent of ribosome; GO:0005198 structural molecule activity; GO:0036094 small molecule binding;	K02892	RP-L23, MRPL23, rplW; large subunit ribosomal protein L23	hsa03010 Ribosome - Homo sapiens (human);	IPR012678; IPR012677;	Ribosomal protein L23/L15e core domain; Nucleotide-binding alpha-beta plait domain;
Q9HCE0	Ectopic P granules protein 5 homolog OS=Homo sapiens OX=9606 GN=EPG5 PE=1 SV=2	3.336	Up	8.0855e-05	EPG5	292.48	3.6	plasma membrane	GO:0016043 cellular component organization; GO:0016192 vesicle-mediated transport; GO:0044763 single-organism cellular process; GO:0044699 single-organism process; GO:0097352 autophagosome maturation; GO:0048284 organelle fusion; GO:0006914 autophagy; GO:0044237 cellular metabolic process; GO:0051234 establishment of localization; GO:0006810 transport; GO:0016197 endosomal transport; GO:1902589 s…	GO:0044424 intracellular part; GO:0005623 cell; GO:0044464 cell part; GO:0005622 intracellular; GO:0005737 cytoplasm;
Q96EK9	Protein KTI12 homolog OS=Homo sapiens OX=9606 GN=KTI12 PE=1 SV=1	2.474	Up	0.00112253	KTI12	38.615	5.1	extracellular			GO:0005524 ATP binding; GO:1901265 nucleoside phosphate binding; GO:0001882 nucleoside binding; GO:0043167 ion binding; GO:0005515 protein binding; GO:0000166 nucleotide binding; GO:0097159 organic cyclic compound binding; GO:1901363 heterocyclic compound binding; GO:0032549 ribonucleoside binding; GO:0097367 carbohydrate derivative binding; GO:0032553 ribonucleotide binding; GO:0005488 binding; …	K15456	KTI12; protein KTI12		IPR027417;	P-loop containing nucleoside triphosphate hydrolase;
Q02252	Methylmalonate-semialdehyde dehydrogenase [acylating], mitochondrial OS=Homo sapiens OX=9606 GN=ALDH6A1 PE=1 SV=2	1.715	Up	0.0086782	ALDH6A1	57.839	33.3	mitochondria	GO:1901606 alpha-amino acid catabolic process; GO:0006725 cellular aromatic compound metabolic process; GO:0048869 cellular developmental process; GO:0044699 single-organism process; GO:0006210 thymine catabolic process; GO:0044237 cellular metabolic process; GO:0006573 valine metabolic process; GO:0071704 organic substance metabolic process; GO:0044270 cellular nitrogen compound catabolic proces…	GO:0005759 mitochondrial matrix; GO:0043229 intracellular organelle; GO:0044421 extracellular region part; GO:0044429 mitochondrial part; GO:0031982 vesicle; GO:0005737 cytoplasm; GO:0044446 intracellular organelle part; GO:0031981 nuclear lumen; GO:0044424 intracellular part; GO:0005623 cell; GO:0005576 extracellular region; GO:0005739 mitochondrion; GO:0044422 organelle part; GO:0070062 extrace…	GO:0003723 RNA binding; GO:0043167 ion binding; GO:0016903 oxidoreductase activity, acting on the aldehyde or oxo group of donors; GO:0018478 malonate-semialdehyde dehydrogenase (acetylating) activity; GO:1901681 sulfur compound binding; GO:0048037 cofactor binding; GO:0016491 oxidoreductase activity; GO:1901363 heterocyclic compound binding; GO:0097159 organic cyclic compound binding; GO:0016620…	K00140	mmsA, iolA, ALDH6A1; malonate-semialdehyde dehydrogenase (acetylating) / methylmalonate-semialdehyde dehydrogenase [EC:1.2.1.18 1.2.1.27]	hsa00280 Valine, leucine and isoleucine degradation - Homo sapiens (human); hsa00410 beta-Alanine metabolism - Homo sapiens (human); hsa00562 Inositol phosphate metabolism - Homo sapiens (human); hsa00640 Propanoate metabolism - Homo sapiens (human); hsa01100 Metabolic pathways - Homo sapiens (human); hsa01200 Carbon metabolism - Homo sapiens (human);	IPR016161; IPR015590; IPR016162; IPR016163;	Aldehyde/histidinol dehydrogenase; Aldehyde dehydrogenase domain; Aldehyde dehydrogenase N-terminal domain; Aldehyde dehydrogenase, C-terminal;
Q5TB80	Centrosomal protein of 162 kDa OS=Homo sapiens OX=9606 GN=CEP162 PE=1 SV=2	12.569	Up	0.00026219	CEP162	161.94	1.6	nucleus	GO:0044085 cellular component biogenesis; GO:0016043 cellular component organization; GO:0044763 single-organism cellular process; GO:0060271 cilium assembly; GO:0044699 single-organism process; GO:0097711 ciliary basal body docking; GO:0022406 membrane docking; GO:0030031 cell projection assembly; GO:0044782 cilium organization; GO:1902589 single-organism organelle organization; GO:0030030 cell …	GO:0044450 microtubule organizing center part; GO:0005874 microtubule; GO:0005737 cytoplasm; GO:0099512 supramolecular fiber; GO:0044424 intracellular part; GO:0099080 supramolecular complex; GO:0005623 cell; GO:0044422 organelle part; GO:0043228 non-membrane-bounded organelle; GO:0005856 cytoskeleton; GO:0005815 microtubule organizing center; GO:0044441 ciliary part; GO:0015630 microtubule cytos…	GO:0005515 protein binding; GO:0005488 binding;	K16809	QN1; protein QN1
Q9BZK7	F-box-like/WD repeat-containing protein TBL1XR1 OS=Homo sapiens OX=9606 GN=TBL1XR1 PE=1 SV=1	1.674	Up	0.00197819	TBL1XR1	55.594	16.7	cytoskeleton	GO:0044700 single organism signaling; GO:0007166 cell surface receptor signaling pathway; GO:0097659 nucleic acid-templated transcription; GO:0009891 positive regulation of biosynthetic process; GO:0044255 cellular lipid metabolic process; GO:0019216 regulation of lipid metabolic process; GO:0044237 cellular metabolic process; GO:0060613 fat pad development; GO:0009605 response to external stimul…	GO:0043229 intracellular organelle; GO:0099513 polymeric cytoskeletal fiber; GO:0005874 microtubule; GO:0043232 intracellular non-membrane-bounded organelle; GO:0044430 cytoskeletal part; GO:0044446 intracellular organelle part; GO:0032991 macromolecular complex; GO:0031981 nuclear lumen; GO:0099512 supramolecular fiber; GO:0017053 transcriptional repressor complex; GO:0044424 intracellular part;…	GO:0042393 histone binding; GO:0003677 DNA binding; GO:0003714 transcription corepressor activity; GO:0047485 protein N-terminus binding; GO:0005515 protein binding; GO:0003712 transcription cofactor activity; GO:1901363 heterocyclic compound binding; GO:0097159 organic cyclic compound binding; GO:0000975 regulatory region DNA binding; GO:0001067 regulatory region nucleic acid binding; GO:0005488…	K04508	TBL1; transducin (beta)-like 1	hsa04310 Wnt signaling pathway - Homo sapiens (human);	IPR017986; IPR015943; IPR006594;	WD40-repeat-containing domain; WD40/YVTN repeat-like-containing domain; LIS1 homology motif;
Q9Y4C8	Probable RNA-binding protein 19 OS=Homo sapiens OX=9606 GN=RBM19 PE=1 SV=3	1.507	Up	0.0178359	RBM19	107.33	1	nucleus	GO:0032502 developmental process; GO:0040019 positive regulation of embryonic development; GO:0044707 single-multicellular organism process; GO:0044699 single-organism process; GO:0032501 multicellular organismal process; GO:0048518 positive regulation of biological process; GO:0051239 regulation of multicellular organismal process; GO:0050789 regulation of biological process; GO:0045995 regulati…	GO:0043229 intracellular organelle; GO:0016020 membrane; GO:0043232 intracellular non-membrane-bounded organelle; GO:0005737 cytoplasm; GO:0044446 intracellular organelle part; GO:0031981 nuclear lumen; GO:0044424 intracellular part; GO:0005730 nucleolus; GO:0005623 cell; GO:0044422 organelle part; GO:0043228 non-membrane-bounded organelle; GO:0043226 organelle; GO:0043231 intracellular membrane-…	GO:0097159 organic cyclic compound binding; GO:1901363 heterocyclic compound binding; GO:0003723 RNA binding; GO:1901265 nucleoside phosphate binding; GO:0005488 binding; GO:0003676 nucleic acid binding; GO:0000166 nucleotide binding; GO:0036094 small molecule binding;	K14787	MRD1, RBM19; multiple RNA-binding domain-containing protein 1		IPR000504; IPR012677; IPR003954;	RNA recognition motif domain; Nucleotide-binding alpha-beta plait domain; RNA recognition motif domain, eukaryote;
P84098	60S ribosomal protein L19 OS=Homo sapiens OX=9606 GN=RPL19 PE=1 SV=1	0.628	Down	0.0052624	RPL19	23.466	31.6	cytoplasm	GO:0044085 cellular component biogenesis; GO:0031100 animal organ regeneration; GO:0022613 ribonucleoprotein complex biogenesis; GO:0072594 establishment of protein localization to organelle; GO:0006518 peptide metabolic process; GO:0048732 gland development; GO:0044699 single-organism process; GO:0009058 biosynthetic process; GO:0044764 multi-organism cellular process; GO:0044237 cellular metabo…	GO:0005840 ribosome; GO:0043229 intracellular organelle; GO:0016020 membrane; GO:0043232 intracellular non-membrane-bounded organelle; GO:0030054 cell junction; GO:0022625 cytosolic large ribosomal subunit; GO:0044446 intracellular organelle part; GO:0005737 cytoplasm; GO:0070161 anchoring junction; GO:0032991 macromolecular complex; GO:0044424 intracellular part; GO:0005829 cytosol; GO:0005623 c…	GO:0097159 organic cyclic compound binding; GO:1901363 heterocyclic compound binding; GO:1990932 5.8S rRNA binding; GO:0003723 RNA binding; GO:0005488 binding; GO:0003676 nucleic acid binding; GO:0005515 protein binding; GO:0005198 structural molecule activity; GO:0003735 structural constituent of ribosome; GO:0070180 large ribosomal subunit rRNA binding; GO:0019843 rRNA binding;	K02885	RP-L19e, RPL19; large subunit ribosomal protein L19e	hsa03010 Ribosome - Homo sapiens (human);	IPR000196; IPR015974; IPR033935; IPR015972;	Ribosomal protein L19/L19e; Ribosomal protein L19/L19e, domain 3; Ribosomal protein L19, eukaryotic; Ribosomal protein L19/L19e, domain 1;
O75817	Ribonuclease P protein subunit p20 OS=Homo sapiens OX=9606 GN=POP7 PE=1 SV=2	2.146	Up	0.0184605	POP7	15.651	10.7	nucleus	GO:0006396 RNA processing; GO:0034470 ncRNA processing; GO:0006725 cellular aromatic compound metabolic process; GO:1901360 organic cyclic compound metabolic process; GO:0006807 nitrogen compound metabolic process; GO:0044238 primary metabolic process; GO:0044237 cellular metabolic process; GO:0071704 organic substance metabolic process; GO:0016070 RNA metabolic process; GO:0090501 RNA phosphodie…	GO:1905348 endonuclease complex; GO:0005655 nucleolar ribonuclease P complex; GO:0005737 cytoplasm; GO:0032991 macromolecular complex; GO:0044424 intracellular part; GO:0005623 cell; GO:0044422 organelle part; GO:0043228 non-membrane-bounded organelle; GO:0031974 membrane-enclosed lumen; GO:1902494 catalytic complex; GO:0005654 nucleoplasm; GO:0070013 intracellular organelle lumen; GO:0044464 cel…	GO:0003723 RNA binding; GO:0004526 ribonuclease P activity; GO:0004521 endoribonuclease activity; GO:0005515 protein binding; GO:0016787 hydrolase activity; GO:0016891 endoribonuclease activity, producing 5'-phosphomonoesters; GO:1901363 heterocyclic compound binding; GO:0097159 organic cyclic compound binding; GO:0004549 tRNA-specific ribonuclease activity; GO:0016893 endonuclease activity, acti…	K14527	RPP20, POP7; ribonuclease P/MRP protein subunit RPP20 [EC:3.1.26.5]	hsa03008 Ribosome biogenesis in eukaryotes - Homo sapiens (human); hsa03013 RNA transport - Homo sapiens (human);
Q9UHW5	GPN-loop GTPase 3 OS=Homo sapiens OX=9606 GN=GPN3 PE=1 SV=2	1.984	Up	0.00028098	GPN3	32.761	9.2	cytoplasm	GO:0046907 intracellular transport; GO:0072594 establishment of protein localization to organelle; GO:0017038 protein import; GO:1902593 single-organism nuclear import; GO:1990022 RNA polymerase III complex localization to nucleus; GO:0044699 single-organism process; GO:0051169 nuclear transport; GO:0044376 RNA polymerase II complex import to nucleus; GO:0015031 protein transport; GO:0051234 esta…	GO:0032991 macromolecular complex; GO:0043234 protein complex; GO:0005623 cell; GO:0005622 intracellular; GO:0044464 cell part;	GO:1901265 nucleoside phosphate binding; GO:0001882 nucleoside binding; GO:0043167 ion binding; GO:0016817 hydrolase activity, acting on acid anhydrides; GO:0005515 protein binding; GO:0016787 hydrolase activity; GO:0000166 nucleotide binding; GO:0017111 nucleoside-triphosphatase activity; GO:1901363 heterocyclic compound binding; GO:0097159 organic cyclic compound binding; GO:0032549 ribonucleos…	K06883	K06883; uncharacterized protein		IPR027417;	P-loop containing nucleoside triphosphate hydrolase;
P35270	Sepiapterin reductase OS=Homo sapiens OX=9606 GN=SPR PE=1 SV=1	2.608	Up	4.4849e-05	SPR	28.048	15.3	mitochondria	GO:0051188 cofactor biosynthetic process; GO:0042559 pteridine-containing compound biosynthetic process; GO:0006725 cellular aromatic compound metabolic process; GO:0044699 single-organism process; GO:0009058 biosynthetic process; GO:0046209 nitric oxide metabolic process; GO:1901566 organonitrogen compound biosynthetic process; GO:0044237 cellular metabolic process; GO:0071704 organic substance …	GO:0043229 intracellular organelle; GO:0044421 extracellular region part; GO:0005737 cytoplasm; GO:0044446 intracellular organelle part; GO:0031982 vesicle; GO:0031981 nuclear lumen; GO:0044424 intracellular part; GO:0005829 cytosol; GO:0005623 cell; GO:0005576 extracellular region; GO:0044422 organelle part; GO:0031974 membrane-enclosed lumen; GO:0043226 organelle; GO:0070062 extracellular exoso…	GO:1901265 nucleoside phosphate binding; GO:0000166 nucleotide binding; GO:0004757 sepiapterin reductase activity; GO:0048037 cofactor binding; GO:0016491 oxidoreductase activity; GO:1901363 heterocyclic compound binding; GO:0097159 organic cyclic compound binding; GO:0016614 oxidoreductase activity, acting on CH-OH group of donors; GO:0016616 oxidoreductase activity, acting on the CH-OH group of…	K00072	SPR; sepiapterin reductase [EC:1.1.1.153]	hsa00790 Folate biosynthesis - Homo sapiens (human); hsa01100 Metabolic pathways - Homo sapiens (human);	IPR016040;	NAD(P)-binding domain;
O00505	Importin subunit alpha-4 OS=Homo sapiens OX=9606 GN=KPNA3 PE=1 SV=2	0.579	Down	0.0050756	KPNA3	57.81	15.2	cytoplasm	GO:0044409 entry into host; GO:0044085 cellular component biogenesis; GO:0065008 regulation of biological quality; GO:0006607 NLS-bearing protein import into nucleus; GO:1902594 multi-organism nuclear import; GO:0072594 establishment of protein localization to organelle; GO:0017038 protein import; GO:0044699 single-organism process; GO:1902581 multi-organism cellular localization; GO:0051169 nucl…	GO:0043229 intracellular organelle; GO:0005643 nuclear pore; GO:0005635 nuclear envelope; GO:0005737 cytoplasm; GO:0044446 intracellular organelle part; GO:0031967 organelle envelope; GO:0031981 nuclear lumen; GO:0012505 endomembrane system; GO:0032991 macromolecular complex; GO:0044424 intracellular part; GO:0005829 cytosol; GO:0005623 cell; GO:0044422 organelle part; GO:0031974 membrane-enclose…	GO:0005048 signal sequence binding; GO:0008565 protein transporter activity; GO:0042277 peptide binding; GO:0005488 binding; GO:0008139 nuclear localization sequence binding; GO:0022892 substrate-specific transporter activity; GO:0008022 protein C-terminus binding; GO:0005515 protein binding; GO:0033218 amide binding; GO:0005215 transporter activity;				IPR002652; IPR011989; IPR016024;	Importin-alpha, importin-beta-binding domain; Armadillo-like helical; Armadillo-type fold;
Q6P6C2	RNA demethylase ALKBH5 OS=Homo sapiens OX=9606 GN=ALKBH5 PE=1 SV=2	0.633	Down	0.0069159	ALKBH5	44.255	9.9	plasma membrane	GO:0050658 RNA transport; GO:0070989 oxidative demethylation; GO:0022414 reproductive process; GO:0048869 cellular developmental process; GO:0044699 single-organism process; GO:0051168 nuclear export; GO:0051169 nuclear transport; GO:0009451 RNA modification; GO:0044237 cellular metabolic process; GO:0015031 protein transport; GO:0051234 establishment of localization; GO:0035510 DNA dealkylation;…	GO:0043229 intracellular organelle; GO:0044446 intracellular organelle part; GO:0005737 cytoplasm; GO:0012505 endomembrane system; GO:0031981 nuclear lumen; GO:0044424 intracellular part; GO:0016604 nuclear body; GO:0005829 cytosol; GO:0005623 cell; GO:0044422 organelle part; GO:0043231 intracellular membrane-bounded organelle; GO:0043226 organelle; GO:0031974 membrane-enclosed lumen; GO:0005654 …	GO:0003723 RNA binding; GO:0043167 ion binding; GO:0016705 oxidoreductase activity, acting on paired donors, with incorporation or reduction of molecular oxygen; GO:0016706 oxidoreductase activity, acting on paired donors, with incorporation or reduction of molecular oxygen, 2-oxoglutarate as one donor, and incorporation of one atom each of oxygen into both donors; GO:0032451 demethylase activity…	K10767	ALKBH5; mRNA N6-methyladenine demethylase [EC:1.14.11.53]		IPR027450;	Alpha-ketoglutarate-dependent dioxygenase AlkB-like;
P52565	Rho GDP-dissociation inhibitor 1 OS=Homo sapiens OX=9606 GN=ARHGDIA PE=1 SV=3	0.64	Down	0.0040229	ARHGDIA	23.207	29.4	cytoplasm	GO:0044700 single organism signaling; GO:0051093 negative regulation of developmental process; GO:0045666 positive regulation of neuron differentiation; GO:0010941 regulation of cell death; GO:0007166 cell surface receptor signaling pathway; GO:0023051 regulation of signaling; GO:0051129 negative regulation of cellular component organization; GO:0048869 cellular developmental process; GO:0051241 …	GO:0043229 intracellular organelle; GO:0044421 extracellular region part; GO:0043232 intracellular non-membrane-bounded organelle; GO:0031982 vesicle; GO:0005737 cytoplasm; GO:0044424 intracellular part; GO:0005623 cell; GO:0005829 cytosol; GO:0005576 extracellular region; GO:0043228 non-membrane-bounded organelle; GO:0043226 organelle; GO:0005856 cytoskeleton; GO:0070062 extracellular exosome; G…	GO:0005094 Rho GDP-dissociation inhibitor activity; GO:0030234 enzyme regulator activity; GO:0060589 nucleoside-triphosphatase regulator activity; GO:0005092 GDP-dissociation inhibitor activity; GO:0005488 binding; GO:0030695 GTPase regulator activity; GO:0005515 protein binding; GO:0098772 molecular function regulator; GO:0008047 enzyme activator activity; GO:0005096 GTPase activator activity;	K12462	ARHGDI, RHOGDI; Rho GDP-dissociation inhibitor	hsa04722 Neurotrophin signaling pathway - Homo sapiens (human); hsa04962 Vasopressin-regulated water reabsorption - Homo sapiens (human);	IPR014756; IPR024792;	Immunoglobulin E-set; Rho GDP-dissociation inhibitor domain;
Q9HBR0	Putative sodium-coupled neutral amino acid transporter 10 OS=Homo sapiens OX=9606 GN=SLC38A10 PE=1 SV=2	2.897	Up	4.476e-05	SLC38A10	119.76	3.1	plasma membrane	GO:0044707 single-multicellular organism process; GO:0034220 ion transmembrane transport; GO:0030001 metal ion transport; GO:0044699 single-organism process; GO:0098656 anion transmembrane transport; GO:0051234 establishment of localization; GO:1902578 single-organism localization; GO:0006812 cation transport; GO:1903825 organic acid transmembrane transport; GO:0006865 amino acid transport; GO:00…	GO:0043229 intracellular organelle; GO:0016020 membrane; GO:0005737 cytoplasm; GO:0031224 intrinsic component of membrane; GO:0012505 endomembrane system; GO:0044424 intracellular part; GO:0005623 cell; GO:0016021 integral component of membrane; GO:0043231 intracellular membrane-bounded organelle; GO:0043226 organelle; GO:0005622 intracellular; GO:0044464 cell part; GO:0044425 membrane part; GO:0…	GO:0005342 organic acid transmembrane transporter activity; GO:0015075 ion transmembrane transporter activity; GO:0022892 substrate-specific transporter activity; GO:0008514 organic anion transmembrane transporter activity; GO:0008509 anion transmembrane transporter activity; GO:0046943 carboxylic acid transmembrane transporter activity; GO:0022891 substrate-specific transmembrane transporter act…	K14996	SLC38A10; solute carrier family 38 (sodium-coupled neutral amino acid transporter), member 10		IPR013057;	Amino acid transporter, transmembrane domain;
Q96GD0	Pyridoxal phosphate phosphatase OS=Homo sapiens OX=9606 GN=PDXP PE=1 SV=2	2.908	Up	0.00128236	PDXP	31.698	13.5	cytoplasm	GO:0044085 cellular component biogenesis; GO:0065008 regulation of biological quality; GO:0043243 positive regulation of protein complex disassembly; GO:0032361 pyridoxal phosphate catabolic process; GO:0042822 pyridoxal phosphate metabolic process; GO:0046683 response to organophosphorus; GO:0044699 single-organism process; GO:0030832 regulation of actin filament length; GO:0044237 cellular meta…	GO:0016020 membrane; GO:0044421 extracellular region part; GO:0071944 cell periphery; GO:0032587 ruffle membrane; GO:0031982 vesicle; GO:0005737 cytoplasm; GO:0044424 intracellular part; GO:0005623 cell; GO:0043228 non-membrane-bounded organelle; GO:0005856 cytoskeleton; GO:0070062 extracellular exosome; GO:0098590 plasma membrane region; GO:0031256 leading edge membrane; GO:0005622 intracellular…	GO:0000287 magnesium ion binding; GO:0004647 phosphoserine phosphatase activity; GO:0031072 heat shock protein binding; GO:0016791 phosphatase activity; GO:0043167 ion binding; GO:0005515 protein binding; GO:0016787 hydrolase activity; GO:0004721 phosphoprotein phosphatase activity; GO:0042578 phosphoric ester hydrolase activity; GO:0003824 catalytic activity; GO:0005488 binding; GO:0098519 nucle…	K07758	PDXP; pyridoxal phosphatase [EC:3.1.3.74]	hsa00750 Vitamin B6 metabolism - Homo sapiens (human); hsa01100 Metabolic pathways - Homo sapiens (human);	IPR023215; IPR023214;	Nitrophenylphosphatase-like domain; HAD-like domain;
Q96A57	Transmembrane protein 230 OS=Homo sapiens OX=9606 GN=TMEM230 PE=1 SV=1	0.64	Down	0.0109802	TMEM230	13.188	9.2	plasma membrane	GO:0051640 organelle localization; GO:0051650 establishment of vesicle localization; GO:0046907 intracellular transport; GO:0048489 synaptic vesicle transport; GO:0016192 vesicle-mediated transport; GO:0044699 single-organism process; GO:0051656 establishment of organelle localization; GO:1902582 single-organism intracellular transport; GO:0097480 establishment of synaptic vesicle localization; G…	GO:0016020 membrane; GO:0005783 endoplasmic reticulum; GO:0031410 cytoplasmic vesicle; GO:0030054 cell junction; GO:0031982 vesicle; GO:0005737 cytoplasm; GO:0031224 intrinsic component of membrane; GO:0044424 intracellular part; GO:0005623 cell; GO:0044422 organelle part; GO:0005776 autophagosome; GO:0005769 early endosome; GO:0055037 recycling endosome; GO:0070382 exocytic vesicle; GO:0008021 s…
[truncated: 1,326 more rows]
